# Supplementary material for: Targeting a check point receptor of human primary natural killer cells via CRISPR/Cas9 potentiates anti-tumor activity in allogeneic glioblastoma
Source: Research Square preprint supplement (doi:10.21203/rs.3.rs-2518848/v1), 2023-01-30
Supplement: Supplementary file 1 [file a8b58f28a134cfa3241a4a79.docx]

**Additional Figures**

**Additional Figure S1.** *TIGIT*mRNA expression in non-tumor and GBM samples in TCGA.

**Additional Figure S2.** Kaplan-Meier curves based on TIGIT expression. HR, hazard ratio.

**Additional Figure S3.** Establishment of TIGIT KO primary human NKCs from the other donor. Graph depicts mock NKC and TIGIT KO NKC proliferation after electroporation. ns, not significant.

**Additional Figure S4.** Treatment of 2D adherent model with mock and negative control NKCs. The graph shows RTCA-based growth inhibition assays. The x- and y-axes depict co-culture duration and the relative normalized cell index, respectively. Data are the mean ± SD of six experiments. *****P* < 0.0001; ****P* < 0.001; ***P* < 0.01; **P* < 0.05; ns, not significant.

**Additional Figure S5.** Treatment of 2D adherent model with TIGIT KO NKCs. Graphs on the left depict representative growth curves of LN-18 cells co-cultured with mock and TIGIT target 1- and target 2-edited NKCs. Growth curve (light green) indicates GBM cells only. Graphs on the right depict RTCA-based growth inhibition assays. X- and Y-axes depict co-culture duration and relative normalized cell index, respectively. Data are the mean ± SD of six experiments. *****P* < 0.0001; ****P* < 0.001; ***P* < 0.01; **P* < 0.05; ns, not significant.

**Additional Figure S6 and S7.** Treatment of 2D adherent model with TIGIT KO NKCs derived from the PBMCs of another donor. Graphs on the left depict representative growth curves of T98G and U251MG cells co-cultured with mock and TIGIT target 2-edited NKCs. Growth curve (light green) indicates GBM cells only. Graphs on the right depict RTCA-based growth inhibition assays. X- and Y-axes depict co-culture duration and relative normalized cell index, respectively. Data are the mean ± SD of six experiments. *****P* < 0.0001; ****P* < 0.001; ***P* < 0.01; **P* < 0.05; ns: not significant.

**Additional Figure S8.** The sequences of the forward and reverse primers used in PCR for T7E1 assay cleavage assessment.

**Additional Tables**

**Additional Table S1. Microarray gene expression analysis**

**Additional Table S2. Enrichment analysis in GO using GSEA software in TIGIT KO NKCs**

**Additional Table S3. Enrichment analysis in GO using GSEA software in mock NKCs**
