# Supplementary material for: Targeting a check point receptor of human primary natural killer cells via CRISPR/Cas9 potentiates anti-tumor activity in allogeneic glioblastoma
Source: Research Square preprint supplement (doi:10.21203/rs.3.rs-2518848/v1), 2023-01-30
Supplement: Supplementary file 2 [file a02a1cde4f8d383c944edcc7.xlsx]

## Sheet: Fig. S1
Probe Set ID	AF_6026_001_(Clariom_S_Human).sst-rma-gene-full-Signal	AF_6026_002_(Clariom_S_Human).sst-rma-gene-full-Signal	Gene Symbol	Cytoband	mRNA Accession	mRNA Source	mRna - Description	mRNA - xhyb	UniGene ID	Chromosome	Strand	Start	Stop	SwissProt accession	GO Biological Process ID	GO Biological Process Term	GO Cellular Component ID	GO Cellular Component Term	GO Molecular Function ID	GO Molecular Function Term	Pathway Source	Pathway Name
TC0100006437.hg.1	28.7611	30.4607	OR4F5	1p36.33	NM_001005484	RefSeq	Homo sapiens olfactory receptor, family 4, subfamily F, member 5 (OR4F5), mRNA.	FALSE	Hs.554500	chr1	+	69091	70008	Q8NH21	GO:0007186 // GO:0050907 // GO:0050911 // GO:0007165 // GO:0007186 // GO:0007186 // GO:0007608 // GO:0050896 // GO:0050907	G-protein coupled receptor signaling pathway // detection of chemical stimulus involved in sensory perception // detection of chemical stimulus involved in sensory perception of smell // signal transduction // G-protein coupled receptor signaling pathway // G-protein coupled receptor signaling pathway // sensory perception of smell // response to stimulus // detection of chemical stimulus involve…	GO:0005886 // GO:0016021 // GO:0005886 // GO:0016020 // GO:0016021 // GO:0016021	plasma membrane // integral component of membrane // plasma membrane // membrane // integral component of membrane // integral component of membrane	GO:0004888 // GO:0004930 // GO:0004984 // GO:0004871 // GO:0004888	transmembrane signaling receptor activity // G-protein coupled receptor activity // olfactory receptor activity // signal transducer activity // transmembrane signaling receptor activity	---	---
TC0100006476.hg.1	92.19	97.5256	SAMD11	1p36.33	NM_152486	RefSeq	Homo sapiens sterile alpha motif domain containing 11 (SAMD11), mRNA.	FALSE	Hs.335293	chr1	+	924880	944581	Q96NU1	GO:0000122 // GO:1903506	negative regulation of transcription from RNA polymerase II promoter // regulation of nucleic acid-templated transcription	GO:0005634	nucleus	GO:0032093 // GO:0042731 // GO:0043621 // GO:0003713	SAM domain binding // PH domain binding // protein self-association // transcription coactivator activity	---	---
TC0100006479.hg.1	153.392	102.951	KLHL17	1p36.33	NM_198317	RefSeq	Homo sapiens kelch-like family member 17 (KLHL17), mRNA.	FALSE	Hs.109212	chr1	+	960587	965719	Q6TDP4	GO:0007420 // GO:0016567 // GO:0016567 // GO:0030036 // GO:0030036 // GO:0007420 // GO:0007420 // GO:0016567 // GO:0030036 // GO:0030036	brain development // protein ubiquitination // protein ubiquitination // actin cytoskeleton organization // actin cytoskeleton organization // brain development // brain development // protein ubiquitination // actin cytoskeleton organization // actin cytoskeleton organization	GO:0005615 // GO:0014069 // GO:0015629 // GO:0015629 // GO:0030054 // GO:0031463 // GO:0032839 // GO:0043025 // GO:0045211 // GO:0005886 // GO:0015629 // GO:0015629 // GO:0016020 // GO:0031463 // GO:0032839 // GO:0032839 // GO:0045202	extracellular space // postsynaptic density // actin cytoskeleton // actin cytoskeleton // cell junction // Cul3-RING ubiquitin ligase complex // dendrite cytoplasm // neuronal cell body // postsynaptic membrane // plasma membrane // actin cytoskeleton // actin cytoskeleton // membrane // Cul3-RING ubiquitin ligase complex // dendrite cytoplasm // dendrite cytoplasm // synapse	GO:0004842 // GO:0031208 // GO:0032947 // GO:0051015 // GO:0003779 // GO:0004842 // GO:0032947 // GO:0051015 // GO:0051015	ubiquitin-protein transferase activity // POZ domain binding // protein complex scaffold // actin filament binding // actin binding // ubiquitin-protein transferase activity // protein complex scaffold // actin filament binding // actin filament binding	---	---
TC0100006480.hg.1	29.2307	32.7258	PLEKHN1	1p36.33	NM_001160184	RefSeq	Homo sapiens pleckstrin homology domain containing, family N member 1 (PLEKHN1), transcript variant 2, mRNA.	FALSE	Hs.528691	chr1	+	966497	975865	Q494U1	---	---	GO:0005886 // GO:0016020	plasma membrane // membrane	GO:0005515	protein binding	---	---
TC0100006483.hg.1	137.863	124.758	ISG15	1p36.33	NM_005101	RefSeq	Homo sapiens ISG15 ubiquitin-like modifier (ISG15), mRNA.	FALSE	Hs.458485	chr1	+	1001138	1014541	P05161	GO:0006281 // GO:0016032 // GO:0019221 // GO:0019941 // GO:0019985 // GO:0031397 // GO:0032020 // GO:0032020 // GO:0032480 // GO:0032649 // GO:0034340 // GO:0042742 // GO:0045071 // GO:0045087 // GO:0045648 // GO:0051607 // GO:0060337 // GO:0002376 // GO:0045087 // GO:0051607	DNA repair // viral process // cytokine-mediated signaling pathway // modification-dependent protein catabolic process // translesion synthesis // negative regulation of protein ubiquitination // ISG15-protein conjugation // ISG15-protein conjugation // negative regulation of type I interferon production // regulation of interferon-gamma production // response to type I interferon // defense resp…	GO:0005576 // GO:0005654 // GO:0005829 // GO:0005576 // GO:0005737	extracellular region // nucleoplasm // cytosol // extracellular region // cytoplasm	GO:0005515 // GO:0031386	protein binding // protein tag	---	---
TC0100006486.hg.1	34.3376	38.5638	AGRN	1p36.33	NM_001305275	RefSeq	Homo sapiens agrin (AGRN), transcript variant 1, mRNA.	FALSE	Hs.273330	chr1	+	1020123	1056119	O00468	GO:0001523 // GO:0005975 // GO:0006024 // GO:0006027 // GO:0007009 // GO:0007165 // GO:0007213 // GO:0007268 // GO:0007411 // GO:0007528 // GO:0007603 // GO:0010469 // GO:0030198 // GO:0030203 // GO:0030204 // GO:0043113 // GO:0043113 // GO:0043525 // GO:0043547 // GO:0044281 // GO:0045162 // GO:0045213 // GO:0045887 // GO:0045944 // GO:0050808 // GO:0051491 // GO:0007213 // GO:0007275 // GO:0008…	retinoid metabolic process // carbohydrate metabolic process // glycosaminoglycan biosynthetic process // glycosaminoglycan catabolic process // plasma membrane organization // signal transduction // G-protein coupled acetylcholine receptor signaling pathway // synaptic transmission // axon guidance // neuromuscular junction development // phototransduction, visible light // regulation of recepto…	GO:0005576 // GO:0005605 // GO:0005615 // GO:0005737 // GO:0005796 // GO:0005886 // GO:0005886 // GO:0009986 // GO:0016021 // GO:0030054 // GO:0031012 // GO:0031012 // GO:0043202 // GO:0045202 // GO:0070062 // GO:0005576 // GO:0005578 // GO:0005604 // GO:0005886 // GO:0016020 // GO:0045202 // GO:0005605	extracellular region // basal lamina // extracellular space // cytoplasm // Golgi lumen // plasma membrane // plasma membrane // cell surface // integral component of membrane // cell junction // extracellular matrix // extracellular matrix // lysosomal lumen // synapse // extracellular exosome // extracellular region // proteinaceous extracellular matrix // basement membrane // plasma membrane /…	GO:0002162 // GO:0005200 // GO:0005509 // GO:0005515 // GO:0030548 // GO:0033691 // GO:0035374 // GO:0043236 // GO:0043395 // GO:0043236 // GO:0003674	dystroglycan binding // structural constituent of cytoskeleton // calcium ion binding // protein binding // acetylcholine receptor regulator activity // sialic acid binding // chondroitin sulfate binding // laminin binding // heparan sulfate proteoglycan binding // laminin binding // molecular_function	---	---
TC0100006490.hg.1	20.2821	27.5168	LINC01342	1p36.33	NR_038869	RefSeq	Homo sapiens long intergenic non-protein coding RNA 1342 (LINC01342), long non-coding RNA.	FALSE	Hs.680488	chr1	+	1137017	1144056	---	---	---	---	---	---	---	---	---
TC0100006492.hg.1	92.0212	116.709	TTLL10	1p36.33	NM_001130045	RefSeq	Homo sapiens tubulin tyrosine ligase-like family member 10 (TTLL10), transcript variant 1, mRNA.	FALSE	Hs.454835	chr1	+	1173884	1197935	Q6ZVT0	GO:0018094 // GO:0006464	protein polyglycylation // cellular protein modification process	---	---	GO:0005515 // GO:0005524 // GO:0070735 // GO:0000166	protein binding // ATP binding // protein-glycine ligase activity // nucleotide binding	---	---
TC0100006494.hg.1	307.239	269.87	B3GALT6	1p36.33	NM_080605	RefSeq	Homo sapiens UDP-Gal:betaGal beta 1,3-galactosyltransferase polypeptide 6 (B3GALT6), mRNA.	FALSE	Hs.284284	chr1	+	1232249	1235041	Q499Z2	GO:0005975 // GO:0006024 // GO:0006486 // GO:0015012 // GO:0030203 // GO:0030204 // GO:0030206 // GO:0044281	carbohydrate metabolic process // glycosaminoglycan biosynthetic process // protein glycosylation // heparan sulfate proteoglycan biosynthetic process // glycosaminoglycan metabolic process // chondroitin sulfate metabolic process // chondroitin sulfate biosynthetic process // small molecule metabolic process	GO:0000139 // GO:0005797 // GO:0016020 // GO:0016021 // GO:0032580 // GO:0005794 // GO:0016020	Golgi membrane // Golgi medial cisterna // membrane // integral component of membrane // Golgi cisterna membrane // Golgi apparatus // membrane	GO:0008499 // GO:0035250 // GO:0047220 // GO:0008378 // GO:0016740 // GO:0016757	UDP-galactose:beta-N-acetylglucosamine beta-1,3-galactosyltransferase activity // UDP-galactosyltransferase activity // galactosylxylosylprotein 3-beta-galactosyltransferase activity // galactosyltransferase activity // transferase activity // transferase activity, transferring glycosyl groups	MetaCyc	PWY-6557
TC0100006497.hg.1	19.7616	25.6927	SCNN1D	1p36.3-p36.2	NM_001130413	RefSeq	Homo sapiens sodium channel, non voltage gated 1 delta subunit (SCNN1D), transcript variant 1, mRNA.	FALSE	Hs.512681	chr1	+	1280436	1292029	P51172	GO:0006814 // GO:0034220 // GO:0035725 // GO:0035725 // GO:0050896 // GO:0050909 // GO:0055085 // GO:0006810 // GO:0006811 // GO:0006814	sodium ion transport // ion transmembrane transport // sodium ion transmembrane transport // sodium ion transmembrane transport // response to stimulus // sensory perception of taste // transmembrane transport // transport // ion transport // sodium ion transport	GO:0005886 // GO:0005886 // GO:0015629 // GO:0016020 // GO:0016021 // GO:0005886 // GO:0016020	plasma membrane // plasma membrane // actin cytoskeleton // membrane // integral component of membrane // plasma membrane // membrane	GO:0005515 // GO:0015280 // GO:0005272 // GO:0015280	protein binding // ligand-gated sodium channel activity // sodium channel activity // ligand-gated sodium channel activity	---	---
TC0100006499.hg.1	81.4227	90.5895	PUSL1	1p36.33	NM_153339	RefSeq	Homo sapiens pseudouridylate synthase-like 1 (PUSL1), mRNA.	FALSE	Hs.400659	chr1	+	1308567	1311677	Q8N0Z8	GO:0001522 // GO:0008033 // GO:0009451	pseudouridine synthesis // tRNA processing // RNA modification	GO:0043231	intracellular membrane-bounded organelle	GO:0003723 // GO:0009982 // GO:0016853	RNA binding // pseudouridine synthase activity // isomerase activity	---	---
TC0100006501.hg.1	323.356	346.029	CPTP	1p36.33	NM_001029885	RefSeq	Homo sapiens ceramide-1-phosphate transfer protein (CPTP), mRNA.	FALSE	Hs.515689	chr1	+	1324756	1328897	Q5TA50	GO:0006665 // GO:0006687 // GO:0044281 // GO:0046836 // GO:1902389 // GO:0006810 // GO:0006869 // GO:0046836	sphingolipid metabolic process // glycosphingolipid metabolic process // small molecule metabolic process // glycolipid transport // ceramide 1-phosphate transport // transport // lipid transport // glycolipid transport	GO:0005634 // GO:0005640 // GO:0005730 // GO:0005737 // GO:0005794 // GO:0005829 // GO:0005886 // GO:0010008 // GO:0005634 // GO:0005737 // GO:0005768 // GO:0005829 // GO:0016020	nucleus // nuclear outer membrane // nucleolus // cytoplasm // Golgi apparatus // cytosol // plasma membrane // endosome membrane // nucleus // cytoplasm // endosome // cytosol // membrane	GO:0005543 // GO:0005548 // GO:0051861 // GO:1902387 // GO:1902388 // GO:0008289 // GO:0017089	phospholipid binding // phospholipid transporter activity // glycolipid binding // ceramide 1-phosphate binding // ceramide 1-phosphate transporter activity // lipid binding // glycolipid transporter activity	---	---
TC0100006502.hg.1	21.8409	22.3326	TAS1R3	1p36.33	NM_152228	RefSeq	Homo sapiens taste receptor, type 1, member 3 (TAS1R3), mRNA.	FALSE	Hs.74375	chr1	+	1331314	1335306	Q7RTX0	GO:0001582 // GO:0007186 // GO:0050916 // GO:0050917 // GO:0007165 // GO:0007186 // GO:0050896 // GO:0050909 // GO:0050916 // GO:0050917	detection of chemical stimulus involved in sensory perception of sweet taste // G-protein coupled receptor signaling pathway // sensory perception of sweet taste // sensory perception of umami taste // signal transduction // G-protein coupled receptor signaling pathway // response to stimulus // sensory perception of taste // sensory perception of sweet taste // sensory perception of umami taste	GO:0005886 // GO:0016021 // GO:1903767 // GO:0005886 // GO:0016020 // GO:0016021	plasma membrane // integral component of membrane // sweet taste receptor complex // plasma membrane // membrane // integral component of membrane	GO:0008527 // GO:0033041 // GO:0046982 // GO:0004871 // GO:0004930 // GO:0008527	taste receptor activity // sweet taste receptor activity // protein heterodimerization activity // signal transducer activity // G-protein coupled receptor activity // taste receptor activity	---	---
TC0100006514.hg.1	15.9905	17.6876	TMEM88B	1p36.33	NM_001146685	RefSeq	Homo sapiens transmembrane protein 88B (TMEM88B), mRNA.	FALSE	Hs.729765	chr1	+	1426128	1427787	A6NKF7	---	---	GO:0016021 // GO:0016020	integral component of membrane // membrane	---	---	---	---
TC0100006516.hg.1	57.9694	62.6304	VWA1	1p36.33	NM_022834	RefSeq	Homo sapiens von Willebrand factor A domain containing 1 (VWA1), transcript variant 1, mRNA.	FALSE	Hs.449009	chr1	+	1434861	1442882	Q6PCB0	GO:0030198 // GO:0048266	extracellular matrix organization // behavioral response to pain	GO:0005604 // GO:0005614 // GO:0005615 // GO:0070062 // GO:0005576 // GO:0005578	basement membrane // interstitial matrix // extracellular space // extracellular exosome // extracellular region // proteinaceous extracellular matrix	GO:0042802	identical protein binding	---	---
TC0100006517.hg.1	11.1309	13.3325	ATAD3C	1p36.33	NM_001039211	RefSeq	Homo sapiens ATPase family, AAA domain containing 3C (ATAD3C), mRNA.	FALSE	Hs.724767	chr1	+	1449689	1470158	Q5T2N8	---	---	---	---	GO:0005524 // GO:0000166	ATP binding // nucleotide binding	---	---
TC0100006524.hg.1	27.684	42.7576	MIB2	1p36.33	NM_001170686	RefSeq	Homo sapiens mindbomb E3 ubiquitin protein ligase 2 (MIB2), transcript variant 2, mRNA.	FALSE	Hs.135805 // Hs.593430	chr1	+	1615415	1630610	Q96AX9	GO:0007219 // GO:0016567 // GO:0016567 // GO:0043123 // GO:0016567	Notch signaling pathway // protein ubiquitination // protein ubiquitination // positive regulation of I-kappaB kinase/NF-kappaB signaling // protein ubiquitination	GO:0000151 // GO:0005737 // GO:0005769 // GO:0005737 // GO:0005737 // GO:0005768	ubiquitin ligase complex // cytoplasm // early endosome // cytoplasm // cytoplasm // endosome	GO:0003779 // GO:0004842 // GO:0004871 // GO:0005515 // GO:0008270 // GO:0016874 // GO:0061630 // GO:0004842 // GO:0004842 // GO:0046872	actin binding // ubiquitin-protein transferase activity // signal transducer activity // protein binding // zinc ion binding // ligase activity // ubiquitin protein ligase activity // ubiquitin-protein transferase activity // ubiquitin-protein transferase activity // metal ion binding	---	---
TC0100006540.hg.1	31.2857	36.7802	CALML6	1p36.33	NM_138705	RefSeq	Homo sapiens calmodulin-like 6 (CALML6), mRNA.	FALSE	Hs.85902	chr1	+	1914827	1917296	Q8TD86	---	---	GO:0005634 // GO:0005737	nucleus // cytoplasm	GO:0005509 // GO:0046872	calcium ion binding // metal ion binding	---	---
TC0100006548.hg.1	10.4405	14.0627	GABRD	1p36.3	NM_000815	RefSeq	Homo sapiens gamma-aminobutyric acid (GABA) A receptor, delta (GABRD), mRNA.	FALSE	Hs.113882	chr1	+	2019324	2030753	O14764	GO:0006810 // GO:0007165 // GO:0007268 // GO:0042391 // GO:0050877 // GO:1902476 // GO:0006810 // GO:0006811 // GO:0006821 // GO:0007268 // GO:0007268 // GO:0042391 // GO:0050877 // GO:1902476 // GO:0007165 // GO:0034220	transport // signal transduction // synaptic transmission // regulation of membrane potential // neurological system process // chloride transmembrane transport // transport // ion transport // chloride transport // synaptic transmission // synaptic transmission // regulation of membrane potential // neurological system process // chloride transmembrane transport // signal transduction // ion tra…	GO:0005887 // GO:0030054 // GO:0034707 // GO:0043005 // GO:0045202 // GO:0045211 // GO:1902711 // GO:0005886 // GO:0016020 // GO:0016021 // GO:0043005 // GO:0045202 // GO:0045202 // GO:1902711	integral component of plasma membrane // cell junction // chloride channel complex // neuron projection // synapse // postsynaptic membrane // GABA-A receptor complex // plasma membrane // membrane // integral component of membrane // neuron projection // synapse // synapse // GABA-A receptor complex	GO:0004890 // GO:0005230 // GO:0005254 // GO:0005515 // GO:0004890 // GO:0005230 // GO:0005230 // GO:0005254 // GO:0005254	GABA-A receptor activity // extracellular ligand-gated ion channel activity // chloride channel activity // protein binding // GABA-A receptor activity // extracellular ligand-gated ion channel activity // extracellular ligand-gated ion channel activity // chloride channel activity // chloride channel activity	---	---
TC0100006550.hg.1	197.686	183.996	PRKCZ	1p36.33-p36.2	NM_001033581	RefSeq	Homo sapiens protein kinase C, zeta (PRKCZ), transcript variant 2, mRNA.	FALSE	Hs.496255	chr1	+	2050470	2185395	Q05513	GO:0000226 // GO:0001954 // GO:0006468 // GO:0006954 // GO:0007165 // GO:0007179 // GO:0007596 // GO:0007616 // GO:0008284 // GO:0008286 // GO:0016477 // GO:0018105 // GO:0030010 // GO:0030168 // GO:0031333 // GO:0031532 // GO:0031584 // GO:0032148 // GO:0032753 // GO:0043066 // GO:0045630 // GO:0046326 // GO:0046627 // GO:0046628 // GO:0047496 // GO:0048010 // GO:0050732 // GO:0051092 // GO:0051…	microtubule cytoskeleton organization // positive regulation of cell-matrix adhesion // protein phosphorylation // inflammatory response // signal transduction // transforming growth factor beta receptor signaling pathway // blood coagulation // long-term memory // positive regulation of cell proliferation // insulin receptor signaling pathway // cell migration // peptidyl-serine phosphorylation …	GO:0005635 // GO:0005737 // GO:0005768 // GO:0005815 // GO:0005829 // GO:0005886 // GO:0005911 // GO:0005923 // GO:0016020 // GO:0016324 // GO:0016363 // GO:0030054 // GO:0031252 // GO:0031941 // GO:0031982 // GO:0035748 // GO:0043203 // GO:0045121 // GO:0045179 // GO:0048471 // GO:0070062 // GO:0005634 // GO:0005737 // GO:0005829 // GO:0005886 // GO:0005938 // GO:0030054 // GO:0043231 // GO:0043…	nuclear envelope // cytoplasm // endosome // microtubule organizing center // cytosol // plasma membrane // cell-cell junction // bicellular tight junction // membrane // apical plasma membrane // nuclear matrix // cell junction // cell leading edge // filamentous actin // vesicle // myelin sheath abaxonal region // axon hillock // membrane raft // apical cortex // perinuclear region of cytoplasm…	GO:0004672 // GO:0004674 // GO:0004674 // GO:0004697 // GO:0005515 // GO:0005524 // GO:0015459 // GO:0019901 // GO:0019904 // GO:0043274 // GO:0043560 // GO:0046872 // GO:0071889 // GO:0000166 // GO:0004672 // GO:0004674 // GO:0004674 // GO:0016301 // GO:0016740	protein kinase activity // protein serine/threonine kinase activity // protein serine/threonine kinase activity // protein kinase C activity // protein binding // ATP binding // potassium channel regulator activity // protein kinase binding // protein domain specific binding // phospholipase binding // insulin receptor substrate binding // metal ion binding // 14-3-3 protein binding // nucleotide…	GenMAPP // GenMAPP // GenMAPP // GenMAPP	G_Protein_Signaling // Wnt_signaling // Calcium_regulation_in_cardiac_cells // Smooth_muscle_contraction
TC0100006565.hg.1	102.6	140.022	SKI	1p36.33	NM_003036	RefSeq	Homo sapiens v-ski avian sarcoma viral oncogene homolog (SKI), mRNA.	FALSE	Hs.656507	chr1	+	2228695	2310213	P12755	GO:0000122 // GO:0000122 // GO:0000122 // GO:0001843 // GO:0002089 // GO:0006351 // GO:0006367 // GO:0007179 // GO:0007179 // GO:0008283 // GO:0008285 // GO:0009948 // GO:0010467 // GO:0010626 // GO:0014902 // GO:0021772 // GO:0022011 // GO:0030177 // GO:0030326 // GO:0030509 // GO:0030512 // GO:0030512 // GO:0030512 // GO:0030514 // GO:0030514 // GO:0031064 // GO:0032926 // GO:0035019 // GO:0042…	negative regulation of transcription from RNA polymerase II promoter // negative regulation of transcription from RNA polymerase II promoter // negative regulation of transcription from RNA polymerase II promoter // neural tube closure // lens morphogenesis in camera-type eye // transcription, DNA-templated // transcription initiation from RNA polymerase II promoter // transforming growth factor …	GO:0005634 // GO:0005654 // GO:0005667 // GO:0005737 // GO:0005737 // GO:0005813 // GO:0016604 // GO:0016605 // GO:0017053 // GO:0043234 // GO:0005634 // GO:0005667 // GO:0005737 // GO:0005737 // GO:0017053	nucleus // nucleoplasm // transcription factor complex // cytoplasm // cytoplasm // centrosome // nuclear body // PML body // transcriptional repressor complex // protein complex // nucleus // transcription factor complex // cytoplasm // cytoplasm // transcriptional repressor complex	GO:0003682 // GO:0003714 // GO:0003714 // GO:0005515 // GO:0008270 // GO:0019901 // GO:0019904 // GO:0031625 // GO:0046332 // GO:0046811 // GO:0070491 // GO:0046332 // GO:0046811	chromatin binding // transcription corepressor activity // transcription corepressor activity // protein binding // zinc ion binding // protein kinase binding // protein domain specific binding // ubiquitin protein ligase binding // SMAD binding // histone deacetylase inhibitor activity // repressing transcription factor binding // SMAD binding // histone deacetylase inhibitor activity	GenMAPP	TGF_Beta_Signaling_Pathway
TC0100006571.hg.1	34.7518	39.5159	SKI	---	hsa_circ_0000009	circbase	Memczak2013 ALT_ACCEPTOR, ALT_DONOR, coding, INTERNAL, intronic best transcript NM_003036	FALSE	---	chr1	+	2293975	2295038	---	---	---	---	---	---	---	---	---
TC0100006577.hg.1	1778.87	2179.7	RER1	1p36	NM_007033	RefSeq	Homo sapiens retention in endoplasmic reticulum sorting receptor 1 (RER1), mRNA.	FALSE	Hs.525527	chr1	+	2391775	2405446	O15258	GO:0006890 // GO:0071340 // GO:0090004 // GO:0007528	retrograde vesicle-mediated transport, Golgi to ER // skeletal muscle acetylcholine-gated channel clustering // positive regulation of establishment of protein localization to plasma membrane // neuromuscular junction development	GO:0005793 // GO:0005794 // GO:0009986 // GO:0030173 // GO:0000139 // GO:0005794 // GO:0016020 // GO:0016021	endoplasmic reticulum-Golgi intermediate compartment // Golgi apparatus // cell surface // integral component of Golgi membrane // Golgi membrane // Golgi apparatus // membrane // integral component of membrane	GO:0033130 // GO:0003674	acetylcholine receptor binding // molecular_function	---	---
TC0100006587.hg.1	755.118	765.353	FAM213B	1p36.32	NM_001195736	RefSeq	Homo sapiens family with sequence similarity 213, member B (FAM213B), transcript variant 1, mRNA.	FALSE	Hs.462033	chr1	+	2586460	2591469	Q8TBF2	GO:0001516 // GO:0019369 // GO:0019371 // GO:0044281 // GO:0055114 // GO:0001516 // GO:0006629 // GO:0006631 // GO:0006633 // GO:0006693	prostaglandin biosynthetic process // arachidonic acid metabolic process // cyclooxygenase pathway // small molecule metabolic process // oxidation-reduction process // prostaglandin biosynthetic process // lipid metabolic process // fatty acid metabolic process // fatty acid biosynthetic process // prostaglandin metabolic process	GO:0005737 // GO:0005783 // GO:0005829 // GO:0043209 // GO:0070062 // GO:0005737 // GO:0005783 // GO:0043209	cytoplasm // endoplasmic reticulum // cytosol // myelin sheath // extracellular exosome // cytoplasm // endoplasmic reticulum // myelin sheath	GO:0016616 // GO:0047017 // GO:0016491 // GO:0016616 // GO:0047017	oxidoreductase activity, acting on the CH-OH group of donors, NAD or NADP as acceptor // prostaglandin-F synthase activity // oxidoreductase activity // oxidoreductase activity, acting on the CH-OH group of donors, NAD or NADP as acceptor // prostaglandin-F synthase activity	---	---
TC0100006602.hg.1	33.6603	36.8023	ACTRT2	1p36.32	NM_080431	RefSeq	Homo sapiens actin-related protein T2 (ACTRT2), mRNA.	FALSE	Hs.236635	chr1	+	3021482	3022903	Q8TDY3	---	---	GO:0005737 // GO:0005856	cytoplasm // cytoskeleton	---	---	---	---
TC0100006604.hg.1	19.0589	26.5282	PRDM16	1p36.23-p33	NM_022114	RefSeq	Homo sapiens PR domain containing 16 (PRDM16), transcript variant 1, mRNA.	FALSE	Hs.99500	chr1	+	3069168	3438621	Q9HAZ2	GO:0000122 // GO:0006325 // GO:0006351 // GO:0022008 // GO:0030512 // GO:0030512 // GO:0030853 // GO:0035019 // GO:0043457 // GO:0043586 // GO:0045892 // GO:0045892 // GO:0045893 // GO:0045893 // GO:0050872 // GO:0050873 // GO:0060021 // GO:0090336 // GO:0006355 // GO:0019827 // GO:0030154 // GO:0043457 // GO:0050873	negative regulation of transcription from RNA polymerase II promoter // chromatin organization // transcription, DNA-templated // neurogenesis // negative regulation of transforming growth factor beta receptor signaling pathway // negative regulation of transforming growth factor beta receptor signaling pathway // negative regulation of granulocyte differentiation // somatic stem cell population …	GO:0005634 // GO:0005829 // GO:0017053 // GO:0005634 // GO:0017053	nucleus // cytosol // transcriptional repressor complex // nucleus // transcriptional repressor complex	GO:0003713 // GO:0005515 // GO:0033613 // GO:0043565 // GO:0046332 // GO:0046872 // GO:0003676 // GO:0003677 // GO:0003713	transcription coactivator activity // protein binding // activating transcription factor binding // sequence-specific DNA binding // SMAD binding // metal ion binding // nucleic acid binding // DNA binding // transcription coactivator activity	---	---
TC0100006613.hg.1	24.5278	25.2432	ARHGEF16	1p36.3	NM_014448	RefSeq	Homo sapiens Rho guanine nucleotide exchange factor (GEF) 16 (ARHGEF16), mRNA.	FALSE	Hs.87435	chr1	+	3454426	3481113	Q5VV41	GO:0007264 // GO:0035023 // GO:0043065 // GO:0048011 // GO:0051056 // GO:0060326 // GO:0090004 // GO:0090630 // GO:0090630 // GO:0097190 // GO:0043547	small GTPase mediated signal transduction // regulation of Rho protein signal transduction // positive regulation of apoptotic process // neurotrophin TRK receptor signaling pathway // regulation of small GTPase mediated signal transduction // cell chemotaxis // positive regulation of establishment of protein localization to plasma membrane // activation of GTPase activity // activation of GTPase…	GO:0005829 // GO:0005737	cytosol // cytoplasm	GO:0005089 // GO:0005515 // GO:0017048 // GO:0030165 // GO:0030971 // GO:0005085 // GO:0005089	Rho guanyl-nucleotide exchange factor activity // protein binding // Rho GTPase binding // PDZ domain binding // receptor tyrosine kinase binding // guanyl-nucleotide exchange factor activity // Rho guanyl-nucleotide exchange factor activity	---	---
TC0100006619.hg.1	1035.65	1120.13	TPRG1L	1p36.32	NM_182752	RefSeq	Homo sapiens tumor protein p63 regulated 1-like (TPRG1L), mRNA.	FALSE	Hs.20529	chr1	+	3624992	3630130	Q5T0D9	GO:0008150	biological_process	GO:0008021 // GO:0030054 // GO:0070062 // GO:0008021 // GO:0031410 // GO:0045202	synaptic vesicle // cell junction // extracellular exosome // synaptic vesicle // cytoplasmic vesicle // synapse	GO:0042802 // GO:0003674	identical protein binding // molecular_function	---	---
TC0100006620.hg.1	41.3012	55.8287	TP73	1p36.3	NM_001126240	RefSeq	Homo sapiens tumor protein p73 (TP73), transcript variant 2, mRNA.	FALSE	Hs.192132	chr1	+	3652520	3736201	O15350	GO:0000122 // GO:0000187 // GO:0001822 // GO:0006298 // GO:0006366 // GO:0006954 // GO:0006974 // GO:0006978 // GO:0007050 // GO:0007346 // GO:0008285 // GO:0008630 // GO:0009791 // GO:0010165 // GO:0010243 // GO:0010332 // GO:0010468 // GO:0016032 // GO:0021766 // GO:0031571 // GO:0033326 // GO:0034644 // GO:0042493 // GO:0042771 // GO:0043508 // GO:0043524 // GO:0045665 // GO:0045793 // GO:0045…	negative regulation of transcription from RNA polymerase II promoter // activation of MAPK activity // kidney development // mismatch repair // transcription from RNA polymerase II promoter // inflammatory response // cellular response to DNA damage stimulus // DNA damage response, signal transduction by p53 class mediator resulting in transcription of p21 class mediator // cell cycle arrest // r…	GO:0000785 // GO:0005634 // GO:0005654 // GO:0005667 // GO:0005794 // GO:0005829 // GO:0030054 // GO:0043231 // GO:0000785 // GO:0000785 // GO:0005634 // GO:0005667 // GO:0005737 // GO:0005829	chromatin // nucleus // nucleoplasm // transcription factor complex // Golgi apparatus // cytosol // cell junction // intracellular membrane-bounded organelle // chromatin // chromatin // nucleus // transcription factor complex // cytoplasm // cytosol	GO:0000978 // GO:0000981 // GO:0001077 // GO:0002039 // GO:0003682 // GO:0003684 // GO:0003690 // GO:0003700 // GO:0005515 // GO:0008134 // GO:0019901 // GO:0042802 // GO:0044212 // GO:0046872 // GO:0002039 // GO:0003677 // GO:0003682 // GO:0003684 // GO:0003690 // GO:0003700 // GO:0003700 // GO:0043565 // GO:0044212	RNA polymerase II core promoter proximal region sequence-specific DNA binding // RNA polymerase II transcription factor activity, sequence-specific DNA binding // transcriptional activator activity, RNA polymerase II core promoter proximal region sequence-specific binding // p53 binding // chromatin binding // damaged DNA binding // double-stranded DNA binding // transcription factor activity, se…	GenMAPP	Apoptosis
TC0100006623.hg.1	17.3731	14.48	CCDC27	1p36.32	NM_152492	RefSeq	Homo sapiens coiled-coil domain containing 27 (CCDC27), mRNA.	FALSE	Hs.348700	chr1	+	3752398	3771645	Q2M243	---	---	---	---	---	---	---	---
TC0100006624.hg.1	56.8854	68.0079	SMIM1	1p36.32	NM_001163724	RefSeq	Homo sapiens small integral membrane protein 1 (Vel blood group) (SMIM1), transcript variant 1, mRNA.	FALSE	Hs.22047	chr1	+	3772761	3775982	B2RUZ4	---	---	GO:0016021 // GO:0070062 // GO:0016020	integral component of membrane // extracellular exosome // membrane	---	---	---	---
TC0100006627.hg.1	119.479	105.135	DFFB	1p36.3	NM_001282669	RefSeq	Homo sapiens DNA fragmentation factor, 40kDa, beta polypeptide (caspase-activated DNase) (DFFB), transcript variant 1, mRNA.	FALSE	Hs.133089	chr1	+	3857267	3885429	O76075	GO:0006309 // GO:0006309 // GO:0006915 // GO:0006921 // GO:0012501 // GO:0030263 // GO:0006309 // GO:0006915 // GO:0007420	apoptotic DNA fragmentation // apoptotic DNA fragmentation // apoptotic process // cellular component disassembly involved in execution phase of apoptosis // programmed cell death // apoptotic chromosome condensation // apoptotic DNA fragmentation // apoptotic process // brain development	GO:0000790 // GO:0005634 // GO:0005654 // GO:0005730 // GO:0005829 // GO:0005829 // GO:0005622 // GO:0005634 // GO:0005737	nuclear chromatin // nucleus // nucleoplasm // nucleolus // cytosol // cytosol // intracellular // nucleus // cytoplasm	GO:0004536 // GO:0019899 // GO:0004518 // GO:0016787 // GO:0003677 // GO:0004536	deoxyribonuclease activity // enzyme binding // nuclease activity // hydrolase activity // DNA binding // deoxyribonuclease activity	GenMAPP // GenMAPP	Apoptosis // Apoptosis_KEGG
TC0100006650.hg.1	9.28914	8.70845	AJAP1	1p36.32	NM_001042478	RefSeq	Homo sapiens adherens junctions associated protein 1 (AJAP1), transcript variant 2, mRNA.	FALSE	Hs.25924	chr1	+	4654732	4792536	Q9UKB5	GO:0007155	cell adhesion	GO:0005912 // GO:0016021 // GO:0016323 // GO:0016324 // GO:0005886 // GO:0016020 // GO:0030054	adherens junction // integral component of membrane // basolateral plasma membrane // apical plasma membrane // plasma membrane // membrane // cell junction	---	---	---	---
TC0100006675.hg.1	26027.3	26230	KCNAB2	1p36.3	NM_001199860	RefSeq	Homo sapiens potassium channel, voltage gated subfamily A regulatory beta subunit 2 (KCNAB2), transcript variant 3, mRNA.	FALSE	Hs.440497	chr1	+	5991466	6101193	Q13303	GO:0002244 // GO:0007268 // GO:0050905 // GO:0055114 // GO:0070995 // GO:0071805 // GO:1901379 // GO:2000008 // GO:0006810 // GO:0006811 // GO:0006813 // GO:0034765 // GO:0055114	hematopoietic progenitor cell differentiation // synaptic transmission // neuromuscular process // oxidation-reduction process // NADPH oxidation // potassium ion transmembrane transport // regulation of potassium ion transmembrane transport // regulation of protein localization to cell surface // transport // ion transport // potassium ion transport // regulation of ion transmembrane transport /…	GO:0005829 // GO:0005874 // GO:0005886 // GO:0008076 // GO:0014069 // GO:0016020 // GO:0030054 // GO:0031234 // GO:0043679 // GO:0044224 // GO:0044224 // GO:1990031 // GO:0005737 // GO:0005856 // GO:0005886 // GO:0016020 // GO:0016021 // GO:0030424 // GO:0042995 // GO:0043005 // GO:0045202	cytosol // microtubule // plasma membrane // voltage-gated potassium channel complex // postsynaptic density // membrane // cell junction // extrinsic component of cytoplasmic side of plasma membrane // axon terminus // juxtaparanode region of axon // juxtaparanode region of axon // pinceau fiber // cytoplasm // cytoskeleton // plasma membrane // membrane // integral component of membrane // axon…	GO:0004033 // GO:0005249 // GO:0015459 // GO:0005244 // GO:0016491	aldo-keto reductase (NADP) activity // voltage-gated potassium channel activity // potassium channel regulator activity // voltage-gated ion channel activity // oxidoreductase activity	---	---
TC0100006681.hg.1	79.373	120.409	RNF207	1p36.31	NM_207396	RefSeq	Homo sapiens ring finger protein 207 (RNF207), mRNA.	FALSE	Hs.716549	chr1	+	6205475	6221299	Q6ZRF8	GO:0010628 // GO:0055117 // GO:0086019 // GO:1901207 // GO:1902261 // GO:1903761 // GO:1903762 // GO:1903953	positive regulation of gene expression // regulation of cardiac muscle contraction // cell-cell signaling involved in cardiac conduction // regulation of heart looping // positive regulation of delayed rectifier potassium channel activity // negative regulation of voltage-gated potassium channel activity involved in ventricular cardiac muscle cell action potential repolarization // positive regul…	GO:0048471 // GO:0005622	perinuclear region of cytoplasm // intracellular	GO:0005515 // GO:0008270 // GO:0030544 // GO:0044325 // GO:0051087 // GO:0046872	protein binding // zinc ion binding // Hsp70 protein binding // ion channel binding // chaperone binding // metal ion binding	---	---
TC0100006682.hg.1	231.676	276.804	LINC00337	1p36.31	NR_103534	RefSeq	Homo sapiens long intergenic non-protein coding RNA 337 (LINC00337), long non-coding RNA.	FALSE	Hs.185688	chr1	+	6236240	6239451	Q8N6G1	---	---	---	---	---	---	---	---
TC0100006683.hg.1	34.4418	34.9501	HES3	1p36.31	NM_001024598	RefSeq	Homo sapiens hes family bHLH transcription factor 3 (HES3), mRNA.	FALSE	Hs.532677	chr1	+	6244192	6245578	Q5TGS1	GO:0000122 // GO:0001701 // GO:0006351 // GO:0021555 // GO:0021557 // GO:0021558 // GO:0021575 // GO:0030901 // GO:0045944 // GO:0060164 // GO:0006355 // GO:0021915 // GO:0045892 // GO:0050767	negative regulation of transcription from RNA polymerase II promoter // in utero embryonic development // transcription, DNA-templated // midbrain-hindbrain boundary morphogenesis // oculomotor nerve development // trochlear nerve development // hindbrain morphogenesis // midbrain development // positive regulation of transcription from RNA polymerase II promoter // regulation of timing of neuron…	GO:0005634	nucleus	GO:0003677 // GO:0008134 // GO:0046983	DNA binding // transcription factor binding // protein dimerization activity	---	---
TC0100006689.hg.1	292.924	288.456	ESPN	1p36.31	NM_031475	RefSeq	Homo sapiens espin (ESPN), mRNA.	FALSE	Hs.744222	chr1	+	6424788	6461370	B1AK53	GO:0007605 // GO:0007626 // GO:0030046 // GO:0051491 // GO:0051494 // GO:0051017	sensory perception of sound // locomotory behavior // parallel actin filament bundle assembly // positive regulation of filopodium assembly // negative regulation of cytoskeleton organization // actin filament bundle assembly	GO:0005737 // GO:0005902 // GO:0005903 // GO:0031941 // GO:0032426 // GO:0005856 // GO:0032420 // GO:0032421 // GO:0042995	cytoplasm // microvillus // brush border // filamentous actin // stereocilium tip // cytoskeleton // stereocilium // stereocilium bundle // cell projection	GO:0017124 // GO:0051015 // GO:0003779 // GO:0051015	SH3 domain binding // actin filament binding // actin binding // actin filament binding	---	---
TC0100006695.hg.1	16.6208	16.1591	TAS1R1	1p36.23	NM_138697	RefSeq	Homo sapiens taste receptor, type 1, member 1 (TAS1R1), transcript variant 2, mRNA.	FALSE	Hs.124574	chr1	+	6555181	6579757	Q7RTX1	GO:0007186 // GO:0050912 // GO:0050912 // GO:0050917 // GO:0007165 // GO:0050896 // GO:0050909 // GO:0050917	G-protein coupled receptor signaling pathway // detection of chemical stimulus involved in sensory perception of taste // detection of chemical stimulus involved in sensory perception of taste // sensory perception of umami taste // signal transduction // response to stimulus // sensory perception of taste // sensory perception of umami taste	GO:0005886 // GO:0016021 // GO:0005886 // GO:0016020 // GO:0016021	plasma membrane // integral component of membrane // plasma membrane // membrane // integral component of membrane	GO:0008527 // GO:0046982 // GO:0004871 // GO:0004930 // GO:0008527	taste receptor activity // protein heterodimerization activity // signal transducer activity // G-protein coupled receptor activity // taste receptor activity	---	---
TC0100006696.hg.1	27.1564	27.0893	ZBTB48	1p36.3	NM_001278647	RefSeq	Homo sapiens zinc finger and BTB domain containing 48 (ZBTB48), transcript variant 2, mRNA.	FALSE	Hs.502330	chr1	+	6579991	6589280	P10074	GO:0006351 // GO:0006355	transcription, DNA-templated // regulation of transcription, DNA-templated	GO:0005654 // GO:0005737 // GO:0005634	nucleoplasm // cytoplasm // nucleus	GO:0003677 // GO:0003700 // GO:0005515 // GO:0046872 // GO:0003676	DNA binding // transcription factor activity, sequence-specific DNA binding // protein binding // metal ion binding // nucleic acid binding	---	---
TC0100006698.hg.1	356.838	295.137	PHF13	1p36.31	NM_153812	RefSeq	Homo sapiens PHD finger protein 13 (PHF13), mRNA.	FALSE	Hs.516079	chr1	+	6613685	6624033	Q86YI8	GO:0000278 // GO:0007059 // GO:0007076 // GO:0016568 // GO:0051301 // GO:0007049 // GO:0007067 // GO:0030261	mitotic cell cycle // chromosome segregation // mitotic chromosome condensation // chromatin modification // cell division // cell cycle // mitotic nuclear division // chromosome condensation	GO:0005634 // GO:0005654 // GO:0005634	nucleus // nucleoplasm // nucleus	GO:0003682 // GO:0008270 // GO:0035064 // GO:0046872	chromatin binding // zinc ion binding // methylated histone binding // metal ion binding	---	---
TC0100006699.hg.1	46.5314	55.1305	THAP3	1p36.31	NM_001195752	RefSeq	Homo sapiens THAP domain containing, apoptosis associated protein 3 (THAP3), transcript variant 1, mRNA.	FALSE	Hs.689006	chr1	+	6624865	6635586	Q8WTV1	---	---	---	---	GO:0003677 // GO:0005515 // GO:0046872 // GO:0003676	DNA binding // protein binding // metal ion binding // nucleic acid binding	---	---
TC0100006707.hg.1	2697.31	3065.11	CAMTA1	1p36.31-p36.23	NM_001195563	RefSeq	Homo sapiens calmodulin binding transcription activator 1 (CAMTA1), transcript variant 2, mRNA.	FALSE	Hs.397705 // Hs.671020	chr1	+	6785324	7769706	Q9Y6Y1	GO:0006366 // GO:0045944 // GO:0050885 // GO:0006351 // GO:0006355 // GO:0006366 // GO:0045944	transcription from RNA polymerase II promoter // positive regulation of transcription from RNA polymerase II promoter // neuromuscular process controlling balance // transcription, DNA-templated // regulation of transcription, DNA-templated // transcription from RNA polymerase II promoter // positive regulation of transcription from RNA polymerase II promoter	GO:0005634 // GO:0005737 // GO:0005634 // GO:0005737	nucleus // cytoplasm // nucleus // cytoplasm	GO:0001077 // GO:0043565 // GO:0001077 // GO:0003677 // GO:0043565 // GO:0043565	transcriptional activator activity, RNA polymerase II core promoter proximal region sequence-specific binding // sequence-specific DNA binding // transcriptional activator activity, RNA polymerase II core promoter proximal region sequence-specific binding // DNA binding // sequence-specific DNA binding // sequence-specific DNA binding	---	---
TC0100006723.hg.1	714.335	821.155	VAMP3	1p36.23	NM_004781	RefSeq	Homo sapiens vesicle-associated membrane protein 3 (VAMP3), mRNA.	FALSE	Hs.66708	chr1	+	7771269	7781432	Q15836	GO:0001921 // GO:0006461 // GO:0006887 // GO:0006904 // GO:0006906 // GO:0016192 // GO:0017156 // GO:0034446 // GO:0035493 // GO:0042147 // GO:0043001 // GO:0051024 // GO:0061025 // GO:0070254 // GO:1903531 // GO:1903593 // GO:0001921 // GO:0006461 // GO:0006810 // GO:0006906 // GO:0015031 // GO:0016192 // GO:0034446	positive regulation of receptor recycling // protein complex assembly // exocytosis // vesicle docking involved in exocytosis // vesicle fusion // vesicle-mediated transport // calcium ion-dependent exocytosis // substrate adhesion-dependent cell spreading // SNARE complex assembly // retrograde transport, endosome to Golgi // Golgi to plasma membrane protein transport // positive regulation of i…	GO:0005622 // GO:0005829 // GO:0005886 // GO:0008021 // GO:0009986 // GO:0016021 // GO:0016324 // GO:0030054 // GO:0030136 // GO:0030141 // GO:0030665 // GO:0031201 // GO:0043005 // GO:0043231 // GO:0055037 // GO:0005886 // GO:0008021 // GO:0016020 // GO:0016021 // GO:0031201 // GO:0031410 // GO:0043229 // GO:0043231 // GO:0045202 // GO:0055037	intracellular // cytosol // plasma membrane // synaptic vesicle // cell surface // integral component of membrane // apical plasma membrane // cell junction // clathrin-coated vesicle // secretory granule // clathrin-coated vesicle membrane // SNARE complex // neuron projection // intracellular membrane-bounded organelle // recycling endosome // plasma membrane // synaptic vesicle // membrane // …	GO:0000149 // GO:0005484 // GO:0005515 // GO:0017075 // GO:0000149 // GO:0000149 // GO:0005484	SNARE binding // SNAP receptor activity // protein binding // syntaxin-1 binding // SNARE binding // SNARE binding // SNAP receptor activity	---	---
TC0100006725.hg.1	32.2177	24.8535	PER3	1p36.23	NM_001289861	RefSeq	Homo sapiens period circadian clock 3 (PER3), transcript variant 2, mRNA.	FALSE	Hs.162200	chr1	+	7784320	7845180	P56645	GO:0000122 // GO:0006351 // GO:0032922 // GO:0045187 // GO:0006355 // GO:0007623 // GO:0048511	negative regulation of transcription from RNA polymerase II promoter // transcription, DNA-templated // circadian regulation of gene expression // regulation of circadian sleep/wake cycle, sleep // regulation of transcription, DNA-templated // circadian rhythm // rhythmic process	GO:0005634 // GO:0005737	nucleus // cytoplasm	GO:0005515 // GO:0019900 // GO:0031625	protein binding // kinase binding // ubiquitin protein ligase binding	---	---
TC0100006729.hg.1	17799.6	19439.8	PARK7	1p36.23	NM_001123377	RefSeq	Homo sapiens parkinson protein 7 (PARK7), transcript variant 2, mRNA.	FALSE	Hs.419640	chr1	+	7954291	7985505	Q99497	GO:0001933 // GO:0006469 // GO:0006508 // GO:0006517 // GO:0006914 // GO:0006954 // GO:0007005 // GO:0007265 // GO:0007338 // GO:0008344 // GO:0010273 // GO:0010628 // GO:0010629 // GO:0018323 // GO:0019243 // GO:0019249 // GO:0031397 // GO:0032091 // GO:0032091 // GO:0032091 // GO:0032148 // GO:0032435 // GO:0032757 // GO:0033138 // GO:0033234 // GO:0034599 // GO:0034599 // GO:0036471 // GO:0042…	negative regulation of protein phosphorylation // negative regulation of protein kinase activity // proteolysis // protein deglycosylation // autophagy // inflammatory response // mitochondrion organization // Ras protein signal transduction // single fertilization // adult locomotory behavior // detoxification of copper ion // positive regulation of gene expression // negative regulation of gene…	GO:0000785 // GO:0005634 // GO:0005737 // GO:0005739 // GO:0005739 // GO:0005747 // GO:0005758 // GO:0005759 // GO:0005783 // GO:0005829 // GO:0005829 // GO:0005886 // GO:0016605 // GO:0030424 // GO:0044297 // GO:0045121 // GO:0070062 // GO:0005634 // GO:0005737 // GO:0005739 // GO:0016020 // GO:0043005	chromatin // nucleus // cytoplasm // mitochondrion // mitochondrion // mitochondrial respiratory chain complex I // mitochondrial intermembrane space // mitochondrial matrix // endoplasmic reticulum // cytosol // cytosol // plasma membrane // PML body // axon // cell body // membrane raft // extracellular exosome // nucleus // cytoplasm // mitochondrion // membrane // neuron projection	GO:0001047 // GO:0003690 // GO:0003697 // GO:0003713 // GO:0003713 // GO:0003729 // GO:0005102 // GO:0005507 // GO:0005515 // GO:0008134 // GO:0008233 // GO:0016532 // GO:0016684 // GO:0019172 // GO:0019899 // GO:0019900 // GO:0019955 // GO:0036470 // GO:0036478 // GO:0042802 // GO:0042803 // GO:0044388 // GO:0044390 // GO:0045340 // GO:0050681 // GO:0051920 // GO:0070491 // GO:0097110 // GO:1903…	core promoter binding // double-stranded DNA binding // single-stranded DNA binding // transcription coactivator activity // transcription coactivator activity // mRNA binding // receptor binding // copper ion binding // protein binding // transcription factor binding // peptidase activity // superoxide dismutase copper chaperone activity // oxidoreductase activity, acting on peroxide as acceptor…	---	---
TC0100006739.hg.1	12.7985	11.9816	SLC45A1	1p36.23	NM_001080397	RefSeq	Homo sapiens solute carrier family 45, member 1 (SLC45A1), mRNA.	FALSE	Hs.463036	chr1	+	8317826	8344167	Q9Y2W3	GO:0008643 // GO:0055085 // GO:0006810 // GO:0015758 // GO:1904659	carbohydrate transport // transmembrane transport // transport // glucose transport // glucose transmembrane transport	GO:0016021 // GO:0016020	integral component of membrane // membrane	GO:0015293 // GO:0005355	symporter activity // glucose transmembrane transporter activity	---	---
TC0100006755.hg.1	4201.25	4988.22	ENO1	---	hsa_circ_0000013	circbase	Memczak2013 ANTISENSE, coding, INTERNAL, UTR3 best transcript NM_001428	FALSE	---	chr1	+	8861178	8861331	---	---	---	---	---	---	---	---	---
TC0100006761.hg.1	98.6918	71.9799	CA6	1p36.2	NM_001215	RefSeq	Homo sapiens carbonic anhydrase VI (CA6), transcript variant 1, mRNA.	FALSE	Hs.100322	chr1	+	8945834	8975092	P23280	GO:0001580 // GO:0006730 // GO:0015701 // GO:0044281	detection of chemical stimulus involved in sensory perception of bitter taste // one-carbon metabolic process // bicarbonate transport // small molecule metabolic process	GO:0005576 // GO:0005615 // GO:0005829 // GO:0070062 // GO:0005576 // GO:0005737	extracellular region // extracellular space // cytosol // extracellular exosome // extracellular region // cytoplasm	GO:0004089 // GO:0008270 // GO:0004089 // GO:0016829 // GO:0046872 // GO:0005515	carbonate dehydratase activity // zinc ion binding // carbonate dehydratase activity // lyase activity // metal ion binding // protein binding	---	---
TC0100006771.hg.1	553.084	516.712	H6PD	1p36	NM_001282587	RefSeq	Homo sapiens hexose-6-phosphate dehydrogenase (glucose 1-dehydrogenase) (H6PD), transcript variant 1, mRNA.	FALSE	Hs.463511	chr1	+	9234775	9271337	O95479	GO:0006006 // GO:0006098 // GO:0055114 // GO:0005975 // GO:0008152 // GO:0006739 // GO:0097305	glucose metabolic process // pentose-phosphate shunt // oxidation-reduction process // carbohydrate metabolic process // metabolic process // NADP metabolic process // response to alcohol	GO:0005788 // GO:0005783 // GO:0005737 // GO:0005739 // GO:0043231	endoplasmic reticulum lumen // endoplasmic reticulum // cytoplasm // mitochondrion // intracellular membrane-bounded organelle	GO:0004345 // GO:0017057 // GO:0047936 // GO:0050661 // GO:0003824 // GO:0004345 // GO:0016491 // GO:0016787 // GO:0030246	glucose-6-phosphate dehydrogenase activity // 6-phosphogluconolactonase activity // glucose 1-dehydrogenase [NAD(P)] activity // NADP binding // catalytic activity // glucose-6-phosphate dehydrogenase activity // oxidoreductase activity // hydrolase activity // carbohydrate binding	---	---
TC0100006773.hg.1	353.931	346.611	SPSB1	1p36.22	NM_025106	RefSeq	Homo sapiens splA/ryanodine receptor domain and SOCS box containing 1 (SPSB1), mRNA.	FALSE	Hs.8261 // Hs.738680	chr1	+	9292880	9369532	Q96BD6	GO:0016567 // GO:0035556	protein ubiquitination // intracellular signal transduction	GO:0005737 // GO:0005622	cytoplasm // intracellular	GO:0005515	protein binding	---	---
TC0100006781.hg.1	306.852	284.86	SLC25A33	1p36.22	NM_032315	RefSeq	Homo sapiens solute carrier family 25 (pyrimidine nucleotide carrier), member 33 (SLC25A33), mRNA.	FALSE	Hs.568613	chr1	+	9539469	9585179	Q9BSK2	GO:0000002 // GO:0002082 // GO:0006264 // GO:0006390 // GO:0006864 // GO:0007005 // GO:0007005 // GO:0008284 // GO:0030307 // GO:0030307 // GO:0031930 // GO:0032869 // GO:0034551 // GO:0051881 // GO:0071156 // GO:1903426 // GO:1990314 // GO:1990519 // GO:1990519 // GO:0006810 // GO:0031930	mitochondrial genome maintenance // regulation of oxidative phosphorylation // mitochondrial DNA replication // transcription from mitochondrial promoter // pyrimidine nucleotide transport // mitochondrion organization // mitochondrion organization // positive regulation of cell proliferation // positive regulation of cell growth // positive regulation of cell growth // mitochondria-nucleus signa…	GO:0005743 // GO:0016021 // GO:0031966 // GO:0005739 // GO:0016020 // GO:0031966	mitochondrial inner membrane // integral component of membrane // mitochondrial membrane // mitochondrion // membrane // mitochondrial membrane	GO:0015218	pyrimidine nucleotide transmembrane transporter activity	---	---
TC0100006784.hg.1	602.684	465.207	TMEM201	1p36.22	NM_001010866	RefSeq	Homo sapiens transmembrane protein 201 (TMEM201), transcript variant 2, mRNA.	FALSE	Hs.632365	chr1	+	9588874	9614877	Q5SNT2	GO:0007097 // GO:0010761	nuclear migration // fibroblast migration	GO:0005637 // GO:0016021 // GO:0005634 // GO:0016020 // GO:0031965	nuclear inner membrane // integral component of membrane // nucleus // membrane // nuclear membrane	GO:0005521 // GO:0051015	lamin binding // actin filament binding	---	---
TC0100006787.hg.1	12732.7	14255	PIK3CD	1p36.2	NM_005026	RefSeq	Homo sapiens phosphatidylinositol-4,5-bisphosphate 3-kinase, catalytic subunit delta (PIK3CD), mRNA.	FALSE	Hs.518451	chr1	+	9651732	9729114	O00329	GO:0001779 // GO:0001782 // GO:0001816 // GO:0002250 // GO:0002551 // GO:0002679 // GO:0006468 // GO:0006644 // GO:0006661 // GO:0006954 // GO:0007165 // GO:0007173 // GO:0008543 // GO:0010628 // GO:0010818 // GO:0014065 // GO:0030101 // GO:0030217 // GO:0030335 // GO:0030593 // GO:0035747 // GO:0035754 // GO:0038095 // GO:0042110 // GO:0042113 // GO:0043303 // GO:0044281 // GO:0045087 // GO:0046…	natural killer cell differentiation // B cell homeostasis // cytokine production // adaptive immune response // mast cell chemotaxis // respiratory burst involved in defense response // protein phosphorylation // phospholipid metabolic process // phosphatidylinositol biosynthetic process // inflammatory response // signal transduction // epidermal growth factor receptor signaling pathway // fibro…	GO:0005829 // GO:0005886 // GO:0005942 // GO:0042629 // GO:0005737 // GO:0005622	cytosol // plasma membrane // phosphatidylinositol 3-kinase complex // mast cell granule // cytoplasm // intracellular	GO:0005515 // GO:0005524 // GO:0016303 // GO:0035004 // GO:0035005 // GO:0046934 // GO:0000166 // GO:0016301 // GO:0016740 // GO:0016773 // GO:0035005 // GO:0046934 // GO:0046934	protein binding // ATP binding // 1-phosphatidylinositol-3-kinase activity // phosphatidylinositol 3-kinase activity // 1-phosphatidylinositol-4-phosphate 3-kinase activity // phosphatidylinositol-4,5-bisphosphate 3-kinase activity // nucleotide binding // kinase activity // transferase activity // phosphotransferase activity, alcohol group as acceptor // 1-phosphatidylinositol-4-phosphate 3-kina…	GenMAPP	G13_Signaling_Pathway
TC0100006801.hg.1	90.034	76.6762	NMNAT1	1p36.22	NM_001297778	RefSeq	Homo sapiens nicotinamide nucleotide adenylyltransferase 1 (NMNAT1), transcript variant 2, mRNA.	FALSE	Hs.633762	chr1	+	9942923	9985501	Q9HAN9	GO:0006766 // GO:0006767 // GO:0009435 // GO:0019674 // GO:0034628 // GO:0044281 // GO:0009058 // GO:0009435 // GO:0019363 // GO:0034628	vitamin metabolic process // water-soluble vitamin metabolic process // NAD biosynthetic process // NAD metabolic process // 'de novo' NAD biosynthetic process from aspartate // small molecule metabolic process // biosynthetic process // NAD biosynthetic process // pyridine nucleotide biosynthetic process // 'de novo' NAD biosynthetic process from aspartate	GO:0005634 // GO:0005654 // GO:0005634	nucleus // nucleoplasm // nucleus	GO:0000309 // GO:0000309 // GO:0004515 // GO:0005515 // GO:0005524 // GO:0000166 // GO:0000309 // GO:0003824 // GO:0004515 // GO:0016740 // GO:0016779	nicotinamide-nucleotide adenylyltransferase activity // nicotinamide-nucleotide adenylyltransferase activity // nicotinate-nucleotide adenylyltransferase activity // protein binding // ATP binding // nucleotide binding // nicotinamide-nucleotide adenylyltransferase activity // catalytic activity // nicotinate-nucleotide adenylyltransferase activity // transferase activity // nucleotidyltransferas…	---	---
TC0100006805.hg.1	14.8735	12.6395	RBP7	1p36.22	NM_052960	RefSeq	Homo sapiens retinol binding protein 7, cellular (RBP7), mRNA.	FALSE	Hs.422688	chr1	+	9997197	10016020	Q96R05	GO:0006810	transport	GO:0005737	cytoplasm	GO:0005215 // GO:0005515 // GO:0016918 // GO:0019841 // GO:0005501 // GO:0008289	transporter activity // protein binding // retinal binding // retinol binding // retinoid binding // lipid binding	---	---
TC0100006806.hg.1	2102.66	1892.36	UBE4B	1p36.3	NM_001105562	RefSeq	Homo sapiens ubiquitination factor E4B (UBE4B), transcript variant 1, mRNA.	FALSE	Hs.593974	chr1	+	10032832	10181239	O95155	GO:0008626 // GO:0009411 // GO:0042787 // GO:0043161 // GO:0006511 // GO:0016567	granzyme-mediated apoptotic signaling pathway // response to UV // protein ubiquitination involved in ubiquitin-dependent protein catabolic process // proteasome-mediated ubiquitin-dependent protein catabolic process // ubiquitin-dependent protein catabolic process // protein ubiquitination	GO:0000151 // GO:0005634 // GO:0005737 // GO:0000151 // GO:0005737	ubiquitin ligase complex // nucleus // cytoplasm // ubiquitin ligase complex // cytoplasm	GO:0016874 // GO:0019899 // GO:0034450 // GO:0004842 // GO:0019899	ligase activity // enzyme binding // ubiquitin-ubiquitin ligase activity // ubiquitin-protein transferase activity // enzyme binding	---	---
TC0100006812.hg.1	160.284	177.564	KIF1B	1p36.2	NM_015074	RefSeq	Homo sapiens kinesin family member 1B (KIF1B), transcript variant 1, mRNA.	FALSE	Hs.97858	chr1	+	10210706	10381603	O60333	GO:0006915 // GO:0007018 // GO:0007018 // GO:0007270 // GO:0007274 // GO:0008089 // GO:0008152 // GO:0016192 // GO:0030705 // GO:0030705 // GO:0047497 // GO:0007018 // GO:0007018 // GO:0007270 // GO:0007274 // GO:0008089 // GO:0016192 // GO:0030705 // GO:0030705	apoptotic process // microtubule-based movement // microtubule-based movement // neuron-neuron synaptic transmission // neuromuscular synaptic transmission // anterograde axon cargo transport // metabolic process // vesicle-mediated transport // cytoskeleton-dependent intracellular transport // cytoskeleton-dependent intracellular transport // mitochondrion transport along microtubule // microtub…	GO:0005739 // GO:0005871 // GO:0005874 // GO:0005875 // GO:0030659 // GO:0031410 // GO:0043005 // GO:0005737 // GO:0005856 // GO:0005871 // GO:0005871 // GO:0005875 // GO:0016023 // GO:0030659 // GO:0031410 // GO:0043005	mitochondrion // kinesin complex // microtubule // microtubule associated complex // cytoplasmic vesicle membrane // cytoplasmic vesicle // neuron projection // cytoplasm // cytoskeleton // kinesin complex // kinesin complex // microtubule associated complex // cytoplasmic membrane-bounded vesicle // cytoplasmic vesicle membrane // cytoplasmic vesicle // neuron projection	GO:0003777 // GO:0005515 // GO:0005524 // GO:0008017 // GO:0008574 // GO:0016887 // GO:0019894 // GO:0000166 // GO:0003777 // GO:0008574 // GO:0016887	microtubule motor activity // protein binding // ATP binding // microtubule binding // ATP-dependent microtubule motor activity, plus-end-directed // ATPase activity // kinesin binding // nucleotide binding // microtubule motor activity // ATP-dependent microtubule motor activity, plus-end-directed // ATPase activity	---	---
TC0100006818.hg.1	2335.35	2564.29	PGD	1p36.22	NM_001304451	RefSeq	Homo sapiens phosphogluconate dehydrogenase (PGD), transcript variant 2, mRNA.	FALSE	Hs.464071	chr1	+	10398592	10420511	P52209	GO:0005975 // GO:0006098 // GO:0006098 // GO:0009051 // GO:0019322 // GO:0019521 // GO:0044281 // GO:0055114 // GO:0006098 // GO:0055114	carbohydrate metabolic process // pentose-phosphate shunt // pentose-phosphate shunt // pentose-phosphate shunt, oxidative branch // pentose biosynthetic process // D-gluconate metabolic process // small molecule metabolic process // oxidation-reduction process // pentose-phosphate shunt // oxidation-reduction process	GO:0005634 // GO:0005829 // GO:0070062 // GO:0005737	nucleus // cytosol // extracellular exosome // cytoplasm	GO:0004616 // GO:0004616 // GO:0050661 // GO:0004616 // GO:0004616 // GO:0016491	phosphogluconate dehydrogenase (decarboxylating) activity // phosphogluconate dehydrogenase (decarboxylating) activity // NADP binding // phosphogluconate dehydrogenase (decarboxylating) activity // phosphogluconate dehydrogenase (decarboxylating) activity // oxidoreductase activity	GenMAPP	Pentose_Phosphate_Pathway
TC0100006819.hg.1	169.289	194.151	APITD1-CORT	1p	NM_001243768	RefSeq	Homo sapiens APITD1-CORT readthrough (APITD1-CORT), transcript variant 3, mRNA.	FALSE	Hs.412311	chr1	+	10430102	10452153	Q8N2Z9	GO:0000278 // GO:0000712 // GO:0006281 // GO:0006281 // GO:0006281 // GO:0006334 // GO:0006974 // GO:0006974 // GO:0006974 // GO:0007049 // GO:0007067 // GO:0007264 // GO:0031297 // GO:0031398 // GO:0034080 // GO:0036297 // GO:0051301 // GO:0007193 // GO:0007268	mitotic cell cycle // resolution of meiotic recombination intermediates // DNA repair // DNA repair // DNA repair // nucleosome assembly // cellular response to DNA damage stimulus // cellular response to DNA damage stimulus // cellular response to DNA damage stimulus // cell cycle // mitotic nuclear division // small GTPase mediated signal transduction // replication fork processing // positive …	GO:0000775 // GO:0000776 // GO:0000777 // GO:0005634 // GO:0005654 // GO:0005694 // GO:0005829 // GO:0043240 // GO:0071821 // GO:0005576 // GO:0005615	chromosome, centromeric region // kinetochore // condensed chromosome kinetochore // nucleus // nucleoplasm // chromosome // cytosol // Fanconi anaemia nuclear complex // FANCM-MHF complex // extracellular region // extracellular space	GO:0003677 // GO:0003677 // GO:0003682 // GO:0003690 // GO:0005515 // GO:0046982 // GO:0001664 // GO:0005179 // GO:0005184	DNA binding // DNA binding // chromatin binding // double-stranded DNA binding // protein binding // protein heterodimerization activity // G-protein coupled receptor binding // hormone activity // neuropeptide hormone activity	---	---
TC0100006822.hg.1	673.128	469.966	PEX14	1p36.22	NM_004565	RefSeq	Homo sapiens peroxisomal biogenesis factor 14 (PEX14), mRNA.	FALSE	Hs.149983	chr1	+	10472288	10630761	O75381	GO:0006461 // GO:0007031 // GO:0007031 // GO:0016558 // GO:0016561 // GO:0032091 // GO:0034453 // GO:0036250 // GO:0043433 // GO:0044721 // GO:0045892 // GO:0051260 // GO:1901094 // GO:0006810 // GO:0015031 // GO:0016560	protein complex assembly // peroxisome organization // peroxisome organization // protein import into peroxisome matrix // protein import into peroxisome matrix, translocation // negative regulation of protein binding // microtubule anchoring // peroxisome transport along microtubule // negative regulation of sequence-specific DNA binding transcription factor activity // protein import into perox…	GO:0005622 // GO:0005634 // GO:0005730 // GO:0005777 // GO:0005778 // GO:0005778 // GO:0016020 // GO:0016021 // GO:0043231 // GO:0043234 // GO:0043234 // GO:0005777 // GO:0005778 // GO:0016020 // GO:0016021 // GO:0043234	intracellular // nucleus // nucleolus // peroxisome // peroxisomal membrane // peroxisomal membrane // membrane // integral component of membrane // intracellular membrane-bounded organelle // protein complex // protein complex // peroxisome // peroxisomal membrane // membrane // integral component of membrane // protein complex	GO:0003714 // GO:0005102 // GO:0005515 // GO:0008017 // GO:0047485 // GO:0048487	transcription corepressor activity // receptor binding // protein binding // microtubule binding // protein N-terminus binding // beta-tubulin binding	---	---
TC0100006840.hg.1	15268.6	11202.8	TARDBP	1p36.22	NM_007375	RefSeq	Homo sapiens TAR DNA binding protein (TARDBP), mRNA.	FALSE	Hs.300624	chr1	+	11012344	11030528	Q13148	GO:0001933 // GO:0006366 // GO:0006397 // GO:0008380 // GO:0010629 // GO:0030264 // GO:0032024 // GO:0034976 // GO:0043922 // GO:0045944 // GO:0051726 // GO:0070935 // GO:0071765 // GO:0006351 // GO:0006355 // GO:0006366 // GO:0008380	negative regulation of protein phosphorylation // transcription from RNA polymerase II promoter // mRNA processing // RNA splicing // negative regulation of gene expression // nuclear fragmentation involved in apoptotic nuclear change // positive regulation of insulin secretion // response to endoplasmic reticulum stress // negative regulation by host of viral transcription // positive regulation…	GO:0005634 // GO:0005654 // GO:0005726 // GO:0005737 // GO:0016607 // GO:0035061 // GO:0005634	nucleus // nucleoplasm // perichromatin fibrils // cytoplasm // nuclear speck // interchromatin granule // nucleus	GO:0000166 // GO:0001205 // GO:0003690 // GO:0003700 // GO:0003723 // GO:0003730 // GO:0005515 // GO:0042802 // GO:0044822 // GO:0003676 // GO:0003677 // GO:0003723	nucleotide binding // transcriptional activator activity, RNA polymerase II distal enhancer sequence-specific binding // double-stranded DNA binding // transcription factor activity, sequence-specific DNA binding // RNA binding // mRNA 3'-UTR binding // protein binding // identical protein binding // poly(A) RNA binding // nucleic acid binding // DNA binding // RNA binding	---	---
TC0100006849.hg.1	59.3962	56.6141	ANGPTL7	1p36	NM_021146	RefSeq	Homo sapiens angiopoietin-like 7 (ANGPTL7), mRNA.	FALSE	Hs.146559	chr1	+	11189289	11195981	O43827	GO:0006979	response to oxidative stress	GO:0005576	extracellular region	---	---	---	---
TC0100006852.hg.1	2956.54	3124.49	UBIAD1	1p36.22	NM_013319	RefSeq	Homo sapiens UbiA prenyltransferase domain containing 1 (UBIAD1), mRNA.	FALSE	Hs.522933	chr1	+	11273198	11296049	Q9Y5Z9	GO:0006744 // GO:0006744 // GO:0009234 // GO:0009234 // GO:0042371 // GO:0042371	ubiquinone biosynthetic process // ubiquinone biosynthetic process // menaquinone biosynthetic process // menaquinone biosynthetic process // vitamin K biosynthetic process // vitamin K biosynthetic process	GO:0005634 // GO:0005737 // GO:0005783 // GO:0005789 // GO:0016020 // GO:0030173 // GO:0031966 // GO:0000139 // GO:0005634 // GO:0005737 // GO:0005739 // GO:0005783 // GO:0005794 // GO:0016020 // GO:0016021	nucleus // cytoplasm // endoplasmic reticulum // endoplasmic reticulum membrane // membrane // integral component of Golgi membrane // mitochondrial membrane // Golgi membrane // nucleus // cytoplasm // mitochondrion // endoplasmic reticulum // Golgi apparatus // membrane // integral component of membrane	GO:0004659 // GO:0005515 // GO:0016209 // GO:0004659 // GO:0016740	prenyltransferase activity // protein binding // antioxidant activity // prenyltransferase activity // transferase activity	---	---
TC0100006857.hg.1	64.0218	57.5242	PTCHD2	1p36.22	NM_020780	RefSeq	Homo sapiens patched domain containing 2 (PTCHD2), mRNA.	FALSE	Hs.202355	chr1	+	11479166	11537584	Q9P2K9	GO:0007224 // GO:0032368 // GO:0042632 // GO:0007165	smoothened signaling pathway // regulation of lipid transport // cholesterol homeostasis // signal transduction	GO:0005783 // GO:0016021 // GO:0031965 // GO:0016020 // GO:0016021	endoplasmic reticulum // integral component of membrane // nuclear membrane // membrane // integral component of membrane	GO:0008158 // GO:0003674	hedgehog receptor activity // molecular_function	---	---
TC0100006861.hg.1	2761.68	3202.53	FBXO44	1p36.22	NM_001014765	RefSeq	Homo sapiens F-box protein 44 (FBXO44), transcript variant 4, mRNA.	FALSE	Hs.556006	chr1	+	11654375	11663327	Q9H4M3	---	---	GO:0019005	SCF ubiquitin ligase complex	GO:0005515	protein binding	---	---
TC0100006862.hg.1	4480.19	4678.45	FBXO6	1p36.22	NM_018438	RefSeq	Homo sapiens F-box protein 6 (FBXO6), mRNA.	FALSE	Hs.464419	chr1	+	11664093	11674354	Q9NRD1	GO:0000077 // GO:0006281 // GO:0006508 // GO:0006516 // GO:0006986 // GO:0016567 // GO:0030433 // GO:0031146 // GO:0006281 // GO:0006974 // GO:0030433	DNA damage checkpoint // DNA repair // proteolysis // glycoprotein catabolic process // response to unfolded protein // protein ubiquitination // ER-associated ubiquitin-dependent protein catabolic process // SCF-dependent proteasomal ubiquitin-dependent protein catabolic process // DNA repair // cellular response to DNA damage stimulus // ER-associated ubiquitin-dependent protein catabolic proce…	GO:0005737 // GO:0019005 // GO:0044322 // GO:0005737	cytoplasm // SCF ubiquitin ligase complex // endoplasmic reticulum quality control compartment // cytoplasm	GO:0001948 // GO:0005515 // GO:0030246 // GO:0061630 // GO:0001948	glycoprotein binding // protein binding // carbohydrate binding // ubiquitin protein ligase activity // glycoprotein binding	---	---
TC0100006864.hg.1	469.174	597.389	DRAXIN	1p36.22	NM_198545	RefSeq	Homo sapiens dorsal inhibitory axon guidance protein (DRAXIN), mRNA.	FALSE	Hs.632364 // Hs.733197	chr1	+	11691722	11725857	Q8NBI3	GO:0007411 // GO:0016055 // GO:0021516 // GO:0021528 // GO:0030517 // GO:0030900 // GO:0043524 // GO:0090090 // GO:0007275 // GO:0007411 // GO:0021516 // GO:0021528 // GO:0030900 // GO:0090090	axon guidance // Wnt signaling pathway // dorsal spinal cord development // commissural neuron differentiation in spinal cord // negative regulation of axon extension // forebrain development // negative regulation of neuron apoptotic process // negative regulation of canonical Wnt signaling pathway // multicellular organismal development // axon guidance // dorsal spinal cord development // comm…	GO:0005576 // GO:0005576	extracellular region // extracellular region	GO:0005515	protein binding	---	---
TC0100006865.hg.1	5452.71	6253.7	AGTRAP	1p36.22	NM_001040194	RefSeq	Homo sapiens angiotensin II receptor-associated protein (AGTRAP), transcript variant 2, mRNA.	FALSE	Hs.464438	chr1	+	11736084	11754802	Q6RW13	GO:0001666 // GO:0008217 // GO:0038166	response to hypoxia // regulation of blood pressure // angiotensin-activated signaling pathway	GO:0000139 // GO:0005654 // GO:0005737 // GO:0005789 // GO:0005886 // GO:0005938 // GO:0016021 // GO:0030659 // GO:0043231 // GO:0005783 // GO:0005794 // GO:0016020 // GO:0031410	Golgi membrane // nucleoplasm // cytoplasm // endoplasmic reticulum membrane // plasma membrane // cell cortex // integral component of membrane // cytoplasmic vesicle membrane // intracellular membrane-bounded organelle // endoplasmic reticulum // Golgi apparatus // membrane // cytoplasmic vesicle	GO:0004945 // GO:0005515	angiotensin type II receptor activity // protein binding	---	---
TC0100006866.hg.1	30.6242	33.4894	C1orf167	1p36.22	NM_001010881	RefSeq	Homo sapiens chromosome 1 open reading frame 167 (C1orf167), mRNA.	FALSE	Hs.585415 // Hs.730573	chr1	+	11761787	11789585	Q5SNV9	---	---	---	---	---	---	---	---
TC0100006874.hg.1	2704.95	2162.17	PLOD1	1p36.22	NM_000302	RefSeq	Homo sapiens procollagen-lysine, 2-oxoglutarate 5-dioxygenase 1 (PLOD1), transcript variant 2, mRNA.	FALSE	Hs.75093	chr1	+	11934205	11975542	Q02809	GO:0001666 // GO:0006464 // GO:0008544 // GO:0008544 // GO:0017185 // GO:0030198 // GO:0032870 // GO:0046947 // GO:0055114 // GO:0001666 // GO:0055114	response to hypoxia // cellular protein modification process // epidermis development // epidermis development // peptidyl-lysine hydroxylation // extracellular matrix organization // cellular response to hormone stimulus // hydroxylysine biosynthetic process // oxidation-reduction process // response to hypoxia // oxidation-reduction process	GO:0005789 // GO:0030867 // GO:0070062 // GO:0005783 // GO:0016020 // GO:0005581	endoplasmic reticulum membrane // rough endoplasmic reticulum membrane // extracellular exosome // endoplasmic reticulum // membrane // collagen trimer	GO:0008198 // GO:0008475 // GO:0031418 // GO:0042277 // GO:0042803 // GO:0005506 // GO:0016491 // GO:0016705 // GO:0046872 // GO:0051213	ferrous iron binding // procollagen-lysine 5-dioxygenase activity // L-ascorbic acid binding // peptide binding // protein homodimerization activity // iron ion binding // oxidoreductase activity // oxidoreductase activity, acting on paired donors, with incorporation or reduction of molecular oxygen // metal ion binding // dioxygenase activity	---	---
TC0100006875.hg.1	2004.93	1955.82	MFN2	1p36.22	NM_001127660	RefSeq	Homo sapiens mitofusin 2 (MFN2), transcript variant 2, mRNA.	FALSE	Hs.376681	chr1	+	11980181	12013515	O95140	GO:0000423 // GO:0001825 // GO:0006626 // GO:0006915 // GO:0006986 // GO:0007006 // GO:0007050 // GO:0007596 // GO:0008053 // GO:0008053 // GO:0008053 // GO:0016236 // GO:0034497 // GO:0046580 // GO:0048593 // GO:0048662 // GO:0051646 // GO:0006914 // GO:0008053 // GO:0048662 // GO:0008152	macromitophagy // blastocyst formation // protein targeting to mitochondrion // apoptotic process // response to unfolded protein // mitochondrial membrane organization // cell cycle arrest // blood coagulation // mitochondrial fusion // mitochondrial fusion // mitochondrial fusion // macroautophagy // protein localization to pre-autophagosomal structure // negative regulation of Ras protein sign…	GO:0005739 // GO:0005741 // GO:0005829 // GO:0015630 // GO:0016021 // GO:0031306 // GO:0005739 // GO:0005741 // GO:0016020	mitochondrion // mitochondrial outer membrane // cytosol // microtubule cytoskeleton // integral component of membrane // intrinsic component of mitochondrial outer membrane // mitochondrion // mitochondrial outer membrane // membrane	GO:0003924 // GO:0005515 // GO:0005525 // GO:0031625 // GO:0000166 // GO:0016787	GTPase activity // protein binding // GTP binding // ubiquitin protein ligase binding // nucleotide binding // hydrolase activity	---	---
TC0100006876.hg.1	222.399	232.725	MIIP	1p36.22	NM_021933	RefSeq	Homo sapiens migration and invasion inhibitory protein (MIIP), mRNA.	FALSE	Hs.8595	chr1	+	12019242	12032049	Q5JXC2	GO:0010972 // GO:0030336	negative regulation of G2/M transition of mitotic cell cycle // negative regulation of cell migration	---	---	GO:0005515	protein binding	---	---
TC0100006877.hg.1	71.425	45.4696	MIIP	---	MIIP.lAug10-unspliced	Ace View	Transcript Identified by AceView, Entrez Gene ID(s) 60672	FALSE	---	chr1	+	12023790	12024159	---	---	---	---	---	---	---	---	---
TC0100006880.hg.1	141.873	113.247	TNFRSF8	1p36	NM_001243	RefSeq	Homo sapiens tumor necrosis factor receptor superfamily, member 8 (TNFRSF8), transcript variant 1, mRNA.	FALSE	Hs.1314	chr1	+	12063377	12144207	P28908	GO:0006954 // GO:0006955 // GO:0007165 // GO:0007275 // GO:0008285 // GO:0032496 // GO:0033209 // GO:0042535 // GO:0043065 // GO:0045556 // GO:0071260 // GO:0097190 // GO:0006954 // GO:0006955 // GO:0007165 // GO:0007275 // GO:0032496 // GO:0033209 // GO:0097190	inflammatory response // immune response // signal transduction // multicellular organismal development // negative regulation of cell proliferation // response to lipopolysaccharide // tumor necrosis factor-mediated signaling pathway // positive regulation of tumor necrosis factor biosynthetic process // positive regulation of apoptotic process // positive regulation of TRAIL biosynthetic proces…	GO:0005737 // GO:0005887 // GO:0070062 // GO:0005886 // GO:0005887 // GO:0016020 // GO:0016021	cytoplasm // integral component of plasma membrane // extracellular exosome // plasma membrane // integral component of plasma membrane // membrane // integral component of membrane	GO:0004888 // GO:0005031 // GO:0004888 // GO:0005031	transmembrane signaling receptor activity // tumor necrosis factor-activated receptor activity // transmembrane signaling receptor activity // tumor necrosis factor-activated receptor activity	---	---
TC0100006881.hg.1	25834	26630.8	TNFRSF1B	1p36.22	NM_001066	RefSeq	Homo sapiens tumor necrosis factor receptor superfamily, member 1B (TNFRSF1B), mRNA.	FALSE	Hs.256278	chr1	+	12166943	12209228	P20333	GO:0006954 // GO:0006955 // GO:0007275 // GO:0007568 // GO:0008630 // GO:0033209 // GO:0042127 // GO:0042981 // GO:0043410 // GO:0050728 // GO:0050779 // GO:0051044 // GO:0071222 // GO:0071363 // GO:0097190 // GO:0097191 // GO:0006915 // GO:0006954 // GO:0006954 // GO:0006955 // GO:0006955 // GO:0007166 // GO:0007275 // GO:0032496 // GO:0042127 // GO:0042981 // GO:0043410 // GO:0097190 // GO:0033…	inflammatory response // immune response // multicellular organismal development // aging // intrinsic apoptotic signaling pathway in response to DNA damage // tumor necrosis factor-mediated signaling pathway // regulation of cell proliferation // regulation of apoptotic process // positive regulation of MAPK cascade // negative regulation of inflammatory response // RNA destabilization // positi…	GO:0005576 // GO:0005634 // GO:0005886 // GO:0005887 // GO:0043025 // GO:0043196 // GO:0045121 // GO:0048471 // GO:0005886 // GO:0005887 // GO:0016020 // GO:0016021 // GO:0030424	extracellular region // nucleus // plasma membrane // integral component of plasma membrane // neuronal cell body // varicosity // membrane raft // perinuclear region of cytoplasm // plasma membrane // integral component of plasma membrane // membrane // integral component of membrane // axon	GO:0005031 // GO:0005515 // GO:0031625 // GO:0005031	tumor necrosis factor-activated receptor activity // protein binding // ubiquitin protein ligase binding // tumor necrosis factor-activated receptor activity	GenMAPP // GenMAPP // GenMAPP // GenMAPP	Apoptosis // Apoptosis_GenMAPP // Apoptosis_KEGG // Inflammatory_Response_Pathway
TC0100006884.hg.1	224.766	243.7	VPS13D	1p36.22	NM_015378	RefSeq	Homo sapiens vacuolar protein sorting 13 homolog D (S. cerevisiae) (VPS13D), transcript variant 1, mRNA.	FALSE	Hs.439381	chr1	+	12230039	12512047	Q5THJ4	GO:0006623 // GO:0045053 // GO:0006623 // GO:0045053	protein targeting to vacuole // protein retention in Golgi apparatus // protein targeting to vacuole // protein retention in Golgi apparatus	GO:0005622 // GO:0005623 // GO:0019898 // GO:0070062 // GO:0005622 // GO:0005623 // GO:0019898	intracellular // cell // extrinsic component of membrane // extracellular exosome // intracellular // cell // extrinsic component of membrane	---	---	---	---
TC0100006900.hg.1	11.0795	7.88391	AADACL4	1p36.21	NM_001013630	RefSeq	Homo sapiens arylacetamide deacetylase-like 4 (AADACL4), mRNA.	FALSE	Hs.209954	chr1	+	12644547	12667086	Q5VUY2	GO:0008152	metabolic process	GO:0016021 // GO:0016020	integral component of membrane // membrane	GO:0052689 // GO:0016787	carboxylic ester hydrolase activity // hydrolase activity	---	---
TC0100006903.hg.1	55.8073	52.1708	AADACL3	1p36.21	NM_001103170	RefSeq	Homo sapiens arylacetamide deacetylase-like 3 (AADACL3), transcript variant 1, mRNA.	FALSE	Hs.464705	chr1	+	12716115	12728759	Q5VUY0	GO:0008152	metabolic process	---	---	GO:0016787	hydrolase activity	---	---
TC0100006905.hg.1	8.74005	8.17909	C1orf158	1p36.21	NM_152290	RefSeq	Homo sapiens chromosome 1 open reading frame 158 (C1orf158), mRNA.	FALSE	Hs.98095	chr1	+	12746186	12763699	Q8N1D5	---	---	---	---	---	---	---	---
TC0100006906.hg.1	9.70627	9.08836	C1orf158	---	C1orf158.eAug10-unspliced	Ace View	Transcript Identified by AceView, Entrez Gene ID(s) 93190	FALSE	---	chr1	+	12756790	12757297	---	---	---	---	---	---	---	---	---
TC0100006907.hg.1	60.6242	62.1242	PRAMEF12	1p36.21	NM_001080830	RefSeq	Homo sapiens PRAME family member 12 (PRAMEF12), mRNA.	FALSE	Hs.156406	chr1	+	12774841	12777906	O95522	GO:0008284 // GO:0043066 // GO:0045596 // GO:0045892 // GO:0048387	positive regulation of cell proliferation // negative regulation of apoptotic process // negative regulation of cell differentiation // negative regulation of transcription, DNA-templated // negative regulation of retinoic acid receptor signaling pathway	---	---	GO:0042974	retinoic acid receptor binding	---	---
TC0100006908.hg.1	9.72203	12.0275	PRAMEF1	1p36.21	NM_001294139	RefSeq	Homo sapiens PRAME family member 1 (PRAMEF1), transcript variant 2, mRNA.	FALSE	Hs.454859	chr1	+	12791397	12796628	O95521	GO:0008284 // GO:0043066 // GO:0045596 // GO:0045892 // GO:0048387	positive regulation of cell proliferation // negative regulation of apoptotic process // negative regulation of cell differentiation // negative regulation of transcription, DNA-templated // negative regulation of retinoic acid receptor signaling pathway	---	---	GO:0042974	retinoic acid receptor binding	---	---
TC0100006910.hg.1	22.2546	11.0362	PRAMEF2	1p36.21	NM_023014	RefSeq	Homo sapiens PRAME family member 2 (PRAMEF2), mRNA.	FALSE	Hs.104991	chr1	+	12857086	12861909	O60811	GO:0008284 // GO:0043066 // GO:0045596 // GO:0045892 // GO:0048387	positive regulation of cell proliferation // negative regulation of apoptotic process // negative regulation of cell differentiation // negative regulation of transcription, DNA-templated // negative regulation of retinoic acid receptor signaling pathway	---	---	GO:0042974	retinoic acid receptor binding	---	---
TC0100006912.hg.1	12.2065	11.1164	PRAMEF7	1p36.21	NM_001012277	RefSeq	Homo sapiens PRAME family member 7 (PRAMEF7), mRNA.	FALSE	Hs.553832	chr1	+	12916610	12920482	Q5VXH5	GO:0008284 // GO:0043066 // GO:0045596 // GO:0045892 // GO:0048387	positive regulation of cell proliferation // negative regulation of apoptotic process // negative regulation of cell differentiation // negative regulation of transcription, DNA-templated // negative regulation of retinoic acid receptor signaling pathway	---	---	GO:0042974	retinoic acid receptor binding	---	---
TC0100006920.hg.1	39.1649	41.6917	PRAMEF9	1p36.21	ENST00000415919	ENSEMBL	PRAME family member 25 [gene_biotype:protein_coding transcript_biotype:protein_coding]	FALSE	---	chr1	+	13172455	13179464	A0A096LNW4	GO:0008284 // GO:0043066 // GO:0045596 // GO:0045892 // GO:0048387	positive regulation of cell proliferation // negative regulation of apoptotic process // negative regulation of cell differentiation // negative regulation of transcription, DNA-templated // negative regulation of retinoic acid receptor signaling pathway	---	---	GO:0042974	retinoic acid receptor binding	---	---
TC0100006922.hg.1	57.2375	46.1624	PRAMEF5	1p36.21	ENST00000622421	ENSEMBL	PRAME family member 5 [gene_biotype:protein_coding transcript_biotype:protein_coding]	FALSE	Hs.567864	chr1	+	13254198	13263435	Q5TYX0	GO:0008284 // GO:0043066 // GO:0045596 // GO:0045892 // GO:0048387	positive regulation of cell proliferation // negative regulation of apoptotic process // negative regulation of cell differentiation // negative regulation of transcription, DNA-templated // negative regulation of retinoic acid receptor signaling pathway	---	---	GO:0042974	retinoic acid receptor binding	---	---
TC0100006925.hg.1	12.4213	10.3408	PRAMEF16	1p36.21	NM_001045480	RefSeq	Homo sapiens PRAME family member 16 (PRAMEF16), mRNA.	FALSE	Hs.684629	chr1	+	13389628	13392631	O60809	GO:0008284 // GO:0043066 // GO:0045596 // GO:0045892 // GO:0048387	positive regulation of cell proliferation // negative regulation of apoptotic process // negative regulation of cell differentiation // negative regulation of transcription, DNA-templated // negative regulation of retinoic acid receptor signaling pathway	---	---	GO:0042974	retinoic acid receptor binding	---	---
TC0100006926.hg.1	10.5509	17.7768	PRAMEF20	1p36.21	NM_001099852	RefSeq	Homo sapiens PRAME family member 20 (PRAMEF20), mRNA.	FALSE	Hs.700561	chr1	+	13410450	13421328	Q5VT98	GO:0008284 // GO:0043066 // GO:0045596 // GO:0045892 // GO:0048387	positive regulation of cell proliferation // negative regulation of apoptotic process // negative regulation of cell differentiation // negative regulation of transcription, DNA-templated // negative regulation of retinoic acid receptor signaling pathway	---	---	GO:0042974	retinoic acid receptor binding	---	---
TC0100006931.hg.1	15.0764	15.6176	PDPN	1p36.21	NM_001006624	RefSeq	Homo sapiens podoplanin (PDPN), transcript variant 3, mRNA.	FALSE	Hs.468675	chr1	+	13583465	13617957	Q86YL7	GO:0000902 // GO:0001946 // GO:0006693 // GO:0006833 // GO:0006865 // GO:0007165 // GO:0008283 // GO:0008360 // GO:0015884 // GO:0016337 // GO:0030324 // GO:0048286 // GO:0048870 // GO:0051272 // GO:2000045 // GO:0000902 // GO:0001946 // GO:0007275 // GO:0030324 // GO:0048870 // GO:0051272	cell morphogenesis // lymphangiogenesis // prostaglandin metabolic process // water transport // amino acid transport // signal transduction // cell proliferation // regulation of cell shape // folic acid transport // single organismal cell-cell adhesion // lung development // lung alveolus development // cell motility // positive regulation of cellular component movement // regulation of G1/S tr…	GO:0001726 // GO:0005886 // GO:0005887 // GO:0009897 // GO:0030027 // GO:0030175 // GO:0031258 // GO:0031527 // GO:0031528 // GO:0032587 // GO:0001726 // GO:0005886 // GO:0016020 // GO:0016021 // GO:0030027 // GO:0030175 // GO:0042995	ruffle // plasma membrane // integral component of plasma membrane // external side of plasma membrane // lamellipodium // filopodium // lamellipodium membrane // filopodium membrane // microvillus membrane // ruffle membrane // ruffle // plasma membrane // membrane // integral component of membrane // lamellipodium // filopodium // cell projection	GO:0005372 // GO:0008517 // GO:0015171 // GO:0015250	water transmembrane transporter activity // folic acid transporter activity // amino acid transmembrane transporter activity // water channel activity	---	---
TC0100006937.hg.1	4476.49	4332.3	PRDM2	1p36.21	NM_001007257	RefSeq	Homo sapiens PR domain containing 2, with ZNF domain (PRDM2), transcript variant 3, mRNA.	FALSE	Hs.371823	chr1	+	13700198	13825079	Q13029	GO:0006351 // GO:0006355 // GO:0008340 // GO:0032355 // GO:0034968 // GO:0006355 // GO:0032259	transcription, DNA-templated // regulation of transcription, DNA-templated // determination of adult lifespan // response to estradiol // histone lysine methylation // regulation of transcription, DNA-templated // methylation	GO:0005634 // GO:0005634 // GO:0005634	nucleus // nucleus // nucleus	GO:0003677 // GO:0003700 // GO:0008270 // GO:0018024 // GO:0003676 // GO:0008168 // GO:0016740 // GO:0046872	DNA binding // transcription factor activity, sequence-specific DNA binding // zinc ion binding // histone-lysine N-methyltransferase activity // nucleic acid binding // methyltransferase activity // transferase activity // metal ion binding	---	---
TC0100006954.hg.1	23.3625	28.8694	KAZN	1p36.21	NM_001017999	RefSeq	Homo sapiens kazrin, periplakin interacting protein (KAZN), transcript variant D, mRNA.	FALSE	Hs.368823	chr1	+	14598704	15118048	Q674X7	GO:0031424	keratinization	GO:0001533 // GO:0005634 // GO:0005737 // GO:0005856 // GO:0030057 // GO:0030054 // GO:0030057	cornified envelope // nucleus // cytoplasm // cytoskeleton // desmosome // cell junction // desmosome	GO:0005515	protein binding	---	---
TC0100006977.hg.1	28.4933	21.7101	TMEM51	1p36.21	NM_001136216	RefSeq	Homo sapiens transmembrane protein 51 (TMEM51), transcript variant 1, mRNA.	FALSE	Hs.465305	chr1	+	15152532	15220480	Q9NW97	GO:0008150	biological_process	GO:0016021 // GO:0005575 // GO:0016020	integral component of membrane // cellular_component // membrane	GO:0005515 // GO:0003674	protein binding // molecular_function	---	---
TC0100006982.hg.1	14427.5	14623.8	EFHD2	1p36.21	NM_024329	RefSeq	Homo sapiens EF-hand domain family, member D2 (EFHD2), mRNA.	FALSE	Hs.465374	chr1	+	15409895	15430343	Q96C19	---	---	GO:0045121 // GO:0016020	membrane raft // membrane	GO:0005509 // GO:0046872	calcium ion binding // metal ion binding	---	---
TC0100006983.hg.1	17.345	15.8155	CTRC	1p36.21	NM_007272	RefSeq	Homo sapiens chymotrypsin C (caldecrin) (CTRC), mRNA.	FALSE	Hs.631869	chr1	+	15438439	15449242	Q99895	GO:0006508 // GO:0006766 // GO:0006767 // GO:0009235 // GO:0044281 // GO:0006508	proteolysis // vitamin metabolic process // water-soluble vitamin metabolic process // cobalamin metabolic process // small molecule metabolic process // proteolysis	GO:0005576	extracellular region	GO:0004252 // GO:0005515 // GO:0008233 // GO:0008233 // GO:0008236 // GO:0016787	serine-type endopeptidase activity // protein binding // peptidase activity // peptidase activity // serine-type peptidase activity // hydrolase activity	---	---
TC0100006989.hg.1	657.869	694.085	DNAJC16	1p36.1	NM_001287811	RefSeq	Homo sapiens DnaJ (Hsp40) homolog, subfamily C, member 16 (DNAJC16), transcript variant 2, mRNA.	FALSE	Hs.655410	chr1	+	15526813	15592379	Q9Y2G8	GO:0045454	cell redox homeostasis	GO:0005623 // GO:0016021 // GO:0016020	cell // integral component of membrane // membrane	---	---	---	---
TC0100006991.hg.1	1825.57	1731.2	RSC1A1	1p36.1	NM_006511	RefSeq	Homo sapiens regulatory solute carrier protein, family 1, member 1 (RSC1A1), mRNA.	FALSE	Hs.239459	chr1	+	15617458	15669044	Q92681	GO:0006351 // GO:0006355 // GO:0006810 // GO:0051051	transcription, DNA-templated // regulation of transcription, DNA-templated // transport // negative regulation of transport	GO:0005634 // GO:0005654 // GO:0005794 // GO:0005886 // GO:0030054 // GO:0043231 // GO:0005634 // GO:0005794 // GO:0005886 // GO:0016020	nucleus // nucleoplasm // Golgi apparatus // plasma membrane // cell junction // intracellular membrane-bounded organelle // nucleus // Golgi apparatus // plasma membrane // membrane	GO:0008200	ion channel inhibitor activity	---	---
TC0100006994.hg.1	994.781	1080.26	PLEKHM2	1p36.21	NM_015164	RefSeq	Homo sapiens pleckstrin homology domain containing, family M (with RUN domain) member 2 (PLEKHM2), mRNA.	FALSE	Hs.646775	chr1	+	15684332	15734769	Q8IWE5	GO:0007030 // GO:0032880	Golgi organization // regulation of protein localization	GO:0005737	cytoplasm	GO:0005515 // GO:0019894	protein binding // kinesin binding	---	---
TC0100006997.hg.1	403.613	337.34	SLC25A34	1p36.21	NM_207348	RefSeq	Homo sapiens solute carrier family 25, member 34 (SLC25A34), mRNA.	FALSE	Hs.631867	chr1	+	15736314	15741396	Q6PIV7	GO:0006810	transport	GO:0005743 // GO:0016021 // GO:0005739 // GO:0016020	mitochondrial inner membrane // integral component of membrane // mitochondrion // membrane	---	---	---	---
TC0100006998.hg.1	24.4812	17.8873	TMEM82	1p36.21	NM_001013641	RefSeq	Homo sapiens transmembrane protein 82 (TMEM82), mRNA.	FALSE	Hs.454828	chr1	+	15742422	15747982	A0PJX8	---	---	GO:0016021 // GO:0016020	integral component of membrane // membrane	---	---	---	---
TC0100006999.hg.1	54.6345	45.4909	FBLIM1	1p36.21	NM_001024215	RefSeq	Homo sapiens filamin binding LIM protein 1 (FBLIM1), transcript variant 2, mRNA.	FALSE	Hs.530101	chr1	+	15756607	15786594	Q8WUP2	GO:0008360 // GO:0016337 // GO:0033623 // GO:0034329 // GO:0007155	regulation of cell shape // single organismal cell-cell adhesion // regulation of integrin activation // cell junction assembly // cell adhesion	GO:0001725 // GO:0005829 // GO:0005925 // GO:0005938 // GO:0005737 // GO:0005856 // GO:0005925 // GO:0030054	stress fiber // cytosol // focal adhesion // cell cortex // cytoplasm // cytoskeleton // focal adhesion // cell junction	GO:0005515 // GO:0008270 // GO:0031005 // GO:0046872	protein binding // zinc ion binding // filamin binding // metal ion binding	---	---
TC0100007006.hg.1	4691.05	4384.86	SPEN	1p36	NM_015001	RefSeq	Homo sapiens spen family transcriptional repressor (SPEN), mRNA.	FALSE	Hs.744843	chr1	+	15847864	15940460	Q96T58	GO:0000122 // GO:0000398 // GO:0006351 // GO:0007219 // GO:0016032 // GO:0045892 // GO:0045893 // GO:0050769 // GO:0000398 // GO:0006355	negative regulation of transcription from RNA polymerase II promoter // mRNA splicing, via spliceosome // transcription, DNA-templated // Notch signaling pathway // viral process // negative regulation of transcription, DNA-templated // positive regulation of transcription, DNA-templated // positive regulation of neurogenesis // mRNA splicing, via spliceosome // regulation of transcription, DNA-t…	GO:0005654 // GO:0017053 // GO:0070062 // GO:0005634	nucleoplasm // transcriptional repressor complex // extracellular exosome // nucleus	GO:0000166 // GO:0001085 // GO:0001191 // GO:0003697 // GO:0003700 // GO:0003714 // GO:0005515 // GO:0044822 // GO:0003676 // GO:0003677 // GO:0003723	nucleotide binding // RNA polymerase II transcription factor binding // transcriptional repressor activity, RNA polymerase II transcription factor binding // single-stranded DNA binding // transcription factor activity, sequence-specific DNA binding // transcription corepressor activity // protein binding // poly(A) RNA binding // nucleic acid binding // DNA binding // RNA binding	---	---
TC0100007017.hg.1	21.6621	27.4145	C1orf64	1p36.13	NM_178840	RefSeq	Homo sapiens chromosome 1 open reading frame 64 (C1orf64), mRNA.	FALSE	Hs.29190	chr1	+	16004236	16008807	Q8NEQ6	---	---	---	---	---	---	---	---
TC0100007020.hg.1	10.2759	13.3214	CLCNKB	1p36	NM_000085	RefSeq	Homo sapiens chloride channel, voltage-sensitive Kb (CLCNKB), transcript variant 1, mRNA.	FALSE	Hs.352243	chr1	+	16043736	16057326	P51801	GO:0006810 // GO:0007588 // GO:0034220 // GO:0055085 // GO:1902476 // GO:1903959 // GO:1903959 // GO:0006810 // GO:0006811 // GO:0006821 // GO:0034765 // GO:0055085 // GO:0034220	transport // excretion // ion transmembrane transport // transmembrane transport // chloride transmembrane transport // regulation of anion transmembrane transport // regulation of anion transmembrane transport // transport // ion transport // chloride transport // regulation of ion transmembrane transport // transmembrane transport // ion transmembrane transport	GO:0005886 // GO:0005887 // GO:0034707 // GO:0005886 // GO:0016020 // GO:0016021	plasma membrane // integral component of plasma membrane // chloride channel complex // plasma membrane // membrane // integral component of membrane	GO:0005247 // GO:0046872 // GO:0005216 // GO:0005244 // GO:0005247 // GO:0005254	voltage-gated chloride channel activity // metal ion binding // ion channel activity // voltage-gated ion channel activity // voltage-gated chloride channel activity // chloride channel activity	---	---
TC0100007038.hg.1	2090.91	2187.86	NECAP2	1p36.13	NM_001145277	RefSeq	Homo sapiens NECAP endocytosis associated 2 (NECAP2), transcript variant 2, mRNA.	FALSE	Hs.437385	chr1	+	16440672	16460089	Q9NVZ3	GO:0006897 // GO:0015031 // GO:0006810 // GO:0006897	endocytosis // protein transport // transport // endocytosis	GO:0005622 // GO:0005886 // GO:0005905 // GO:0030125 // GO:0016020 // GO:0030125 // GO:0030665 // GO:0031410	intracellular // plasma membrane // coated pit // clathrin vesicle coat // membrane // clathrin vesicle coat // clathrin-coated vesicle membrane // cytoplasmic vesicle	---	---	---	---
TC0100007050.hg.1	22.9409	28.8264	FAM231B	1p36.13	NM_001310155	RefSeq	Homo sapiens family with sequence similarity 231, member B (FAM231B), mRNA.	FALSE	---	chr1	+	16538724	16540035	A6NCW3	---	---	---	---	---	---	---	---
TC0100007063.hg.1	257.974	165.168	FAM231C	1p36.13	NM_001310138	RefSeq	Homo sapiens family with sequence similarity 231, member C (FAM231C), mRNA.	FALSE	---	chr1	+	16673003	16673657	P0DMU4	---	---	---	---	---	---	---	---
TC0100007091.hg.1	581.235	596.786	CROCC	---	hsa_circ_0092359	circbase	Zhang2013 ALT_ACCEPTOR, ALT_DONOR, coding, INTERNAL, intronic best transcript NM_014675	FALSE	---	chr1	+	16944903	16945102	---	---	---	---	---	---	---	---	---
TC0100007102.hg.1	57.1499	31.8294	PADI1	1p36.13	NM_013358	RefSeq	Homo sapiens peptidyl arginine deiminase, type I (PADI1), mRNA.	FALSE	Hs.412941	chr1	+	17205126	17246006	Q9ULC6	GO:0018101	protein citrullination	GO:0005737 // GO:0070062	cytoplasm // extracellular exosome	GO:0004668 // GO:0005509 // GO:0016787	protein-arginine deiminase activity // calcium ion binding // hydrolase activity	HumanCyc	PWY-4921
TC0100007103.hg.1	17.8226	17.0381	PADI3	1p36.13	NM_016233	RefSeq	Homo sapiens peptidyl arginine deiminase, type III (PADI3), mRNA.	FALSE	Hs.149195	chr1	+	17249098	17284233	Q9ULW8	GO:0018101	protein citrullination	GO:0005737	cytoplasm	GO:0004668 // GO:0005509 // GO:0004668 // GO:0016787	protein-arginine deiminase activity // calcium ion binding // protein-arginine deiminase activity // hydrolase activity	HumanCyc	PWY-4921
TC0100007105.hg.1	13.1901	14.864	PADI4	1p36.13	NM_012387	RefSeq	Homo sapiens peptidyl arginine deiminase, type IV (PADI4), mRNA.	FALSE	Hs.522969	chr1	+	17308195	17364004	Q9UM07	GO:0006325 // GO:0006334 // GO:0006338 // GO:0006351 // GO:0006355 // GO:0006464 // GO:0016568 // GO:0018101 // GO:0019827 // GO:0036413 // GO:0036414 // GO:0045087 // GO:0002376 // GO:0006334 // GO:0006338 // GO:0016568 // GO:0018101 // GO:0019827	chromatin organization // nucleosome assembly // chromatin remodeling // transcription, DNA-templated // regulation of transcription, DNA-templated // cellular protein modification process // chromatin modification // protein citrullination // stem cell population maintenance // histone H3-R26 citrullination // histone citrullination // innate immune response // immune system process // nucleosom…	GO:0005634 // GO:0005654 // GO:0005737 // GO:0005634	nucleus // nucleoplasm // cytoplasm // nucleus	GO:0004668 // GO:0005509 // GO:0005515 // GO:0016990 // GO:0004668 // GO:0004668 // GO:0005509 // GO:0016787 // GO:0046872	protein-arginine deiminase activity // calcium ion binding // protein binding // arginine deiminase activity // protein-arginine deiminase activity // protein-arginine deiminase activity // calcium ion binding // hydrolase activity // metal ion binding	HumanCyc	PWY-4921
TC0100007108.hg.1	18.8162	16.309	PADI6	1p36.13	NM_207421	RefSeq	Homo sapiens peptidyl arginine deiminase, type VI (PADI6), mRNA.	FALSE	Hs.531598	chr1	+	17372196	17401699	Q6TGC4	GO:0007010 // GO:0007028 // GO:0018101 // GO:0043143 // GO:0034613	cytoskeleton organization // cytoplasm organization // protein citrullination // regulation of translation by machinery localization // cellular protein localization	GO:0005634 // GO:0005737 // GO:0045111	nucleus // cytoplasm // intermediate filament cytoskeleton	GO:0004668 // GO:0005509 // GO:0016787	protein-arginine deiminase activity // calcium ion binding // hydrolase activity	---	---
TC0100007117.hg.1	26.0833	34.412	ARHGEF10L	1p36.13	NM_001011722	RefSeq	Homo sapiens Rho guanine nucleotide exchange factor (GEF) 10-like (ARHGEF10L), transcript variant 2, mRNA.	FALSE	Hs.443460	chr1	+	17539835	17697875	Q9HCE6	GO:0035023 // GO:0043547	regulation of Rho protein signal transduction // positive regulation of GTPase activity	GO:0005737	cytoplasm	GO:0005089 // GO:0005085	Rho guanyl-nucleotide exchange factor activity // guanyl-nucleotide exchange factor activity	---	---
TC0100007127.hg.1	26.6707	26.8878	ACTL8	1p36.13	NM_030812	RefSeq	Homo sapiens actin-like 8 (ACTL8), mRNA.	FALSE	Hs.2149	chr1	+	17755313	17827063	Q9H568	GO:0030855	epithelial cell differentiation	GO:0005737 // GO:0005856	cytoplasm // cytoskeleton	GO:0005515	protein binding	---	---
TC0100007136.hg.1	61.4211	55.6125	IGSF21	1p36.13	NM_032880	RefSeq	Homo sapiens immunoglobin superfamily, member 21 (IGSF21), mRNA.	FALSE	Hs.212511	chr1	+	18107746	18378483	Q96ID5	---	---	GO:0005576	extracellular region	---	---	---	---
TC0100007144.hg.1	8.90763	10.3472	KLHDC7A	1p36.13	NM_152375	RefSeq	Homo sapiens kelch domain containing 7A (KLHDC7A), mRNA.	FALSE	Hs.406913 // Hs.710799	chr1	+	18480930	18486126	Q5VTJ3	GO:0016567 // GO:0016567	protein ubiquitination // protein ubiquitination	GO:0016021 // GO:0031463 // GO:0016020 // GO:0031463	integral component of membrane // Cul3-RING ubiquitin ligase complex // membrane // Cul3-RING ubiquitin ligase complex	GO:0004842 // GO:0004842	ubiquitin-protein transferase activity // ubiquitin-protein transferase activity	---	---
TC0100007147.hg.1	16.5688	21.9103	PAX7	1p36.13	NM_001135254	RefSeq	Homo sapiens paired box 7 (PAX7), transcript variant 3, mRNA.	FALSE	Hs.113253	chr1	+	18631006	18748875	P23759	GO:0006338 // GO:0006351 // GO:0009653 // GO:0010453 // GO:0014813 // GO:0021527 // GO:0021904 // GO:0031062 // GO:0043066 // GO:0043393 // GO:0043403 // GO:0045944 // GO:0048663 // GO:0048706 // GO:0051216 // GO:0060415 // GO:2000288 // GO:0006355 // GO:0007275 // GO:0007517 // GO:0007519 // GO:0010468	chromatin remodeling // transcription, DNA-templated // anatomical structure morphogenesis // regulation of cell fate commitment // skeletal muscle satellite cell commitment // spinal cord association neuron differentiation // dorsal/ventral neural tube patterning // positive regulation of histone methylation // negative regulation of apoptotic process // regulation of protein binding // skeletal…	GO:0005634	nucleus	GO:0000983 // GO:0003700 // GO:0043565 // GO:0003677	transcription factor activity, RNA polymerase II core promoter sequence-specific // transcription factor activity, sequence-specific DNA binding // sequence-specific DNA binding // DNA binding	---	---
TC0100007160.hg.1	275.519	323.142	MRTO4	1p36.13	NM_016183	RefSeq	Homo sapiens MRT4 homolog, ribosome maturation factor (MRTO4), mRNA.	FALSE	Hs.463797	chr1	+	19251539	19260128	Q9UKD2	GO:0042254	ribosome biogenesis	GO:0005634 // GO:0005654 // GO:0005730 // GO:0005737 // GO:0031965 // GO:0005622 // GO:0005634 // GO:0005730 // GO:0005840 // GO:0030529	nucleus // nucleoplasm // nucleolus // cytoplasm // nuclear membrane // intracellular // nucleus // nucleolus // ribosome // ribonucleoprotein complex	GO:0005515 // GO:0044822	protein binding // poly(A) RNA binding	---	---
TC0100007162.hg.1	818.1	760.535	PQLC2	1p36.13	NM_001040125	RefSeq	Homo sapiens PQ loop repeat containing 2 (PQLC2), transcript variant 1, mRNA.	FALSE	Hs.647620	chr1	+	19312246	19334437	Q6ZP29	GO:0015809 // GO:0015819 // GO:0080144 // GO:1903401 // GO:1903826 // GO:1990822 // GO:1990822 // GO:0006810 // GO:0006865 // GO:0015802 // GO:0080144	arginine transport // lysine transport // amino acid homeostasis // L-lysine transmembrane transport // arginine transmembrane transport // basic amino acid transmembrane transport // basic amino acid transmembrane transport // transport // amino acid transport // basic amino acid transport // amino acid homeostasis	GO:0005765 // GO:0031301 // GO:0043231 // GO:0005764 // GO:0005765 // GO:0016020 // GO:0016021	lysosomal membrane // integral component of organelle membrane // intracellular membrane-bounded organelle // lysosome // lysosomal membrane // membrane // integral component of membrane	GO:0015174 // GO:0015181 // GO:0015189 // GO:0015174	basic amino acid transmembrane transporter activity // arginine transmembrane transporter activity // L-lysine transmembrane transporter activity // basic amino acid transmembrane transporter activity	---	---
TC0100007175.hg.1	8.37454	10.3354	HTR6	1p36-p35	NM_000871	RefSeq	Homo sapiens 5-hydroxytryptamine (serotonin) receptor 6, G protein-coupled (HTR6), mRNA.	FALSE	Hs.22180	chr1	+	19665287	19680966	P50406	GO:0007187 // GO:0007210 // GO:0007268 // GO:0021795 // GO:0032008 // GO:0007165 // GO:0007186 // GO:0021795	G-protein coupled receptor signaling pathway, coupled to cyclic nucleotide second messenger // serotonin receptor signaling pathway // synaptic transmission // cerebral cortex cell migration // positive regulation of TOR signaling // signal transduction // G-protein coupled receptor signaling pathway // cerebral cortex cell migration	GO:0005886 // GO:0005887 // GO:0005929 // GO:0005886 // GO:0016020 // GO:0016021	plasma membrane // integral component of plasma membrane // cilium // plasma membrane // membrane // integral component of membrane	GO:0004969 // GO:0004993 // GO:0005515 // GO:0004871 // GO:0004930	histamine receptor activity // serotonin receptor activity // protein binding // signal transducer activity // G-protein coupled receptor activity	GenMAPP // GenMAPP	GPCRDB_Class_A_Rhodopsin-like // Monoamine_GPCRs
TC0100007184.hg.1	296.625	248.07	OTUD3	1p36.13	NM_015207	RefSeq	Homo sapiens OTU deubiquitinase 3 (OTUD3), mRNA.	FALSE	Hs.374987	chr1	+	19882395	19912945	Q5T2D3	GO:0035871 // GO:0044313 // GO:0006508	protein K11-linked deubiquitination // protein K6-linked deubiquitination // proteolysis	---	---	GO:0004843 // GO:0008233 // GO:0008234 // GO:0016787	ubiquitin-specific protease activity // peptidase activity // cysteine-type peptidase activity // hydrolase activity	---	---
TC0100007188.hg.1	63.2756	63.6282	PLA2G5	1p36-p34	NM_000929	RefSeq	Homo sapiens phospholipase A2, group V (PLA2G5), mRNA.	FALSE	Hs.319438	chr1	+	20028179	20091901	P39877	GO:0006644 // GO:0006654 // GO:0006663 // GO:0010518 // GO:0016042 // GO:0019370 // GO:0034097 // GO:0036148 // GO:0036149 // GO:0036150 // GO:0036151 // GO:0036152 // GO:0044281 // GO:0046474 // GO:0050482 // GO:0051591 // GO:0070374 // GO:0006629 // GO:0006644	phospholipid metabolic process // phosphatidic acid biosynthetic process // platelet activating factor biosynthetic process // positive regulation of phospholipase activity // lipid catabolic process // leukotriene biosynthetic process // response to cytokine // phosphatidylglycerol acyl-chain remodeling // phosphatidylinositol acyl-chain remodeling // phosphatidylserine acyl-chain remodeling // …	GO:0005576 // GO:0005794 // GO:0005886 // GO:0009986 // GO:0048471 // GO:0005576	extracellular region // Golgi apparatus // plasma membrane // cell surface // perinuclear region of cytoplasm // extracellular region	GO:0005509 // GO:0008201 // GO:0047498 // GO:0004623 // GO:0016787 // GO:0046872 // GO:0047498	calcium ion binding // heparin binding // calcium-dependent phospholipase A2 activity // phospholipase A2 activity // hydrolase activity // metal ion binding // calcium-dependent phospholipase A2 activity	HumanCyc	LIPASYN-PWY
TC0100007191.hg.1	79.3781	51.6439	PLA2G2F	1p35	NM_022819	RefSeq	Homo sapiens phospholipase A2, group IIF (PLA2G2F), mRNA.	FALSE	Hs.302034	chr1	+	20139326	20150386	Q9BZM2	GO:0006644 // GO:0006654 // GO:0016042 // GO:0036148 // GO:0036149 // GO:0036150 // GO:0036151 // GO:0036152 // GO:0044281 // GO:0046474 // GO:0006629 // GO:0006644 // GO:0008150	phospholipid metabolic process // phosphatidic acid biosynthetic process // lipid catabolic process // phosphatidylglycerol acyl-chain remodeling // phosphatidylinositol acyl-chain remodeling // phosphatidylserine acyl-chain remodeling // phosphatidylcholine acyl-chain remodeling // phosphatidylethanolamine acyl-chain remodeling // small molecule metabolic process // glycerophospholipid biosynthe…	GO:0005576 // GO:0005576 // GO:0005829 // GO:0005576	extracellular region // extracellular region // cytosol // extracellular region	GO:0004623 // GO:0005509 // GO:0004623 // GO:0016787 // GO:0046872	phospholipase A2 activity // calcium ion binding // phospholipase A2 activity // hydrolase activity // metal ion binding	HumanCyc	LIPASYN-PWY
TC0100007194.hg.1	89.7651	129.502	UBXN10	1p36.12	NM_152376	RefSeq	Homo sapiens UBX domain protein 10 (UBXN10), mRNA.	FALSE	Hs.432503	chr1	+	20186078	20196048	Q96LJ8	---	---	---	---	---	---	---	---
TC0100007199.hg.1	38.2174	46.1698	VWA5B1	1p36.12	NM_001039500	RefSeq	Homo sapiens von Willebrand factor A domain containing 5B1 (VWA5B1), mRNA.	FALSE	Hs.205178	chr1	+	20290919	20354894	Q5TIE3	---	---	GO:0005576	extracellular region	---	---	---	---
TC0100007205.hg.1	15.6987	15.4579	FAM43B	1p36.12	NM_207334	RefSeq	Homo sapiens family with sequence similarity 43, member B (FAM43B), mRNA.	FALSE	Hs.429179	chr1	+	20552439	20555020	Q6ZT52	---	---	---	---	---	---	---	---
TC0100007206.hg.1	8.00438	9.64042	CDA	1p36.2-p35	NM_001785	RefSeq	Homo sapiens cytidine deaminase (CDA), mRNA.	FALSE	Hs.466910	chr1	+	20588948	20618908	P32320	GO:0006206 // GO:0007166 // GO:0008655 // GO:0009972 // GO:0019858 // GO:0030308 // GO:0043097 // GO:0044281 // GO:0045980 // GO:0051289 // GO:0055086 // GO:0009972	pyrimidine nucleobase metabolic process // cell surface receptor signaling pathway // pyrimidine-containing compound salvage // cytidine deamination // cytosine metabolic process // negative regulation of cell growth // pyrimidine nucleoside salvage // small molecule metabolic process // negative regulation of nucleotide metabolic process // protein homotetramerization // nucleobase-containing sm…	GO:0005576 // GO:0005829 // GO:0005829	extracellular region // cytosol // cytosol	GO:0001882 // GO:0004126 // GO:0004126 // GO:0005515 // GO:0008270 // GO:0008270 // GO:0042803 // GO:0003824 // GO:0004126 // GO:0004126 // GO:0008270 // GO:0016787 // GO:0042802 // GO:0046872	nucleoside binding // cytidine deaminase activity // cytidine deaminase activity // protein binding // zinc ion binding // zinc ion binding // protein homodimerization activity // catalytic activity // cytidine deaminase activity // cytidine deaminase activity // zinc ion binding // hydrolase activity // identical protein binding // metal ion binding	HumanCyc // HumanCyc // HumanCyc // HumanCyc // HumanCyc // HumanCyc	P1-PWY // PWY0-1295 // PWY0-1298 // PWY0-181 // PWY0-163 // DRIBOPMET-PWY
TC0100007207.hg.1	59.6697	70.9411	PINK1	1p36	NM_032409	RefSeq	Homo sapiens PTEN induced putative kinase 1 (PINK1), mRNA.	FALSE	Hs.389171	chr1	+	20633455	20651511	Q9BXM7	GO:0000422 // GO:0000423 // GO:0001934 // GO:0002082 // GO:0006468 // GO:0006468 // GO:0006468 // GO:0006511 // GO:0006950 // GO:0006979 // GO:0007005 // GO:0010310 // GO:0010629 // GO:0010821 // GO:0010952 // GO:0016236 // GO:0016239 // GO:0016242 // GO:0016310 // GO:0016567 // GO:0018105 // GO:0018105 // GO:0018105 // GO:0022904 // GO:0031396 // GO:0031396 // GO:0031398 // GO:0032148 // GO:0032…	mitophagy // macromitophagy // positive regulation of protein phosphorylation // regulation of oxidative phosphorylation // protein phosphorylation // protein phosphorylation // protein phosphorylation // ubiquitin-dependent protein catabolic process // response to stress // response to oxidative stress // mitochondrion organization // regulation of hydrogen peroxide metabolic process // negative…	GO:0000151 // GO:0000785 // GO:0005634 // GO:0005737 // GO:0005739 // GO:0005739 // GO:0005741 // GO:0005741 // GO:0005741 // GO:0005742 // GO:0005743 // GO:0005758 // GO:0005758 // GO:0005829 // GO:0005829 // GO:0005856 // GO:0016020 // GO:0030424 // GO:0031307 // GO:0031932 // GO:0044297 // GO:0048471 // GO:0097413 // GO:0097449 // GO:0005737 // GO:0005739 // GO:0005741 // GO:0005829 // GO:0016…	ubiquitin ligase complex // chromatin // nucleus // cytoplasm // mitochondrion // mitochondrion // mitochondrial outer membrane // mitochondrial outer membrane // mitochondrial outer membrane // mitochondrial outer membrane translocase complex // mitochondrial inner membrane // mitochondrial intermembrane space // mitochondrial intermembrane space // cytosol // cytosol // cytoskeleton // membrane…	GO:0000287 // GO:0002020 // GO:0002020 // GO:0004672 // GO:0004674 // GO:0004674 // GO:0004674 // GO:0005515 // GO:0005524 // GO:0010857 // GO:0016301 // GO:0016301 // GO:0016504 // GO:0031625 // GO:0043422 // GO:0055131 // GO:0000166 // GO:0004672 // GO:0004674 // GO:0005524 // GO:0016301 // GO:0016740 // GO:0046872	magnesium ion binding // protease binding // protease binding // protein kinase activity // protein serine/threonine kinase activity // protein serine/threonine kinase activity // protein serine/threonine kinase activity // protein binding // ATP binding // calcium-dependent protein kinase activity // kinase activity // kinase activity // peptidase activator activity // ubiquitin protein ligase b…	---	---
TC0100007240.hg.1	57.3294	53.1875	NBPF3	1p36.12	NM_001256416	RefSeq	Homo sapiens neuroblastoma breakpoint family, member 3 (NBPF3), transcript variant 2, mRNA.	FALSE	Hs.325422	chr1	+	21440090	21485005	Q9H094	GO:1903955	positive regulation of protein targeting to mitochondrion	GO:0005737	cytoplasm	---	---	---	---
TC0100007243.hg.1	9.67055	8.69383	ALPL	1p36.12	NM_000478	RefSeq	Homo sapiens alkaline phosphatase, liver/bone/kidney (ALPL), transcript variant 1, mRNA.	FALSE	Hs.75431	chr1	+	21509365	21578412	P05186	GO:0001501 // GO:0001649 // GO:0001958 // GO:0003006 // GO:0016311 // GO:0032496 // GO:0033280 // GO:0046677 // GO:0051384 // GO:0071407 // GO:0071529 // GO:0008152 // GO:0031214	skeletal system development // osteoblast differentiation // endochondral ossification // developmental process involved in reproduction // dephosphorylation // response to lipopolysaccharide // response to vitamin D // response to antibiotic // response to glucocorticoid // cellular response to organic cyclic compound // cementum mineralization // metabolic process // biomineral tissue developme…	GO:0005578 // GO:0005615 // GO:0005886 // GO:0016020 // GO:0016021 // GO:0031225 // GO:0070062 // GO:0016020 // GO:0065010	proteinaceous extracellular matrix // extracellular space // plasma membrane // membrane // integral component of membrane // anchored component of membrane // extracellular exosome // membrane // extracellular membrane-bounded organelle	GO:0004035 // GO:0005515 // GO:0016462 // GO:0046872 // GO:0003824 // GO:0016787 // GO:0016791	alkaline phosphatase activity // protein binding // pyrophosphatase activity // metal ion binding // catalytic activity // hydrolase activity // phosphatase activity	---	---
TC0100007254.hg.1	132.179	165.069	LDLRAD2	1p36.12	NM_001013693	RefSeq	Homo sapiens low density lipoprotein receptor class A domain containing 2 (LDLRAD2), mRNA.	FALSE	Hs.745158	chr1	+	21812265	21825221	Q5SZI1	---	---	GO:0016021 // GO:0016020	integral component of membrane // membrane	---	---	---	---
TC0100007255.hg.1	31.6451	27.1024	HSPG2	---	hsa_circ_0008411	circbase	Jeck2013 ANTISENSE, CDS, coding, INTERNAL, intronic, OVCODE, OVEXON best transcript NM_005529	FALSE	---	chr1	+	21847534	21847691	---	---	---	---	---	---	---	---	---
TC0100007261.hg.1	15.1548	21.7636	CELA3B	1p36.12	NM_007352	RefSeq	Homo sapiens chymotrypsin-like elastase family, member 3B (CELA3B), mRNA.	FALSE	Hs.728752	chr1	+	21976925	21998642	P08861	GO:0006508 // GO:0008203 // GO:0006508	proteolysis // cholesterol metabolic process // proteolysis	GO:0005615 // GO:0005615	extracellular space // extracellular space	GO:0004252 // GO:0008233 // GO:0004252 // GO:0004252 // GO:0008233 // GO:0008236 // GO:0016787	serine-type endopeptidase activity // peptidase activity // serine-type endopeptidase activity // serine-type endopeptidase activity // peptidase activity // serine-type peptidase activity // hydrolase activity	---	---
TC0100007264.hg.1	11.664	9.58869	CELA3A	1p36.12	NM_005747	RefSeq	Homo sapiens chymotrypsin-like elastase family, member 3A (CELA3A), mRNA.	FALSE	Hs.181289	chr1	+	22001656	22012542	P09093	GO:0006508 // GO:0007586 // GO:0008203 // GO:0006508	proteolysis // digestion // cholesterol metabolic process // proteolysis	GO:0005615 // GO:0005615	extracellular space // extracellular space	GO:0004252 // GO:0004252 // GO:0008233 // GO:0008236 // GO:0016787	serine-type endopeptidase activity // serine-type endopeptidase activity // peptidase activity // serine-type peptidase activity // hydrolase activity	GenMAPP // GenMAPP // GenMAPP	GPCRDB_Class_A_Rhodopsin-like // GPCRDB_Other // Peptide_GPCRs
TC0100007268.hg.1	51526.4	52623.5	CDC42	1p36.1	NM_001039802	RefSeq	Homo sapiens cell division cycle 42 (CDC42), transcript variant 3, mRNA.	FALSE	Hs.467637	chr1	+	22052627	22092946	P60953	GO:0002040 // GO:0003161 // GO:0003334 // GO:0007030 // GO:0007088 // GO:0007097 // GO:0007163 // GO:0007173 // GO:0007264 // GO:0007411 // GO:0007596 // GO:0010628 // GO:0010629 // GO:0016567 // GO:0021762 // GO:0030036 // GO:0030225 // GO:0030307 // GO:0031069 // GO:0031274 // GO:0031295 // GO:0031333 // GO:0031424 // GO:0031647 // GO:0032467 // GO:0033138 // GO:0034332 // GO:0034613 // GO:0035…	sprouting angiogenesis // cardiac conduction system development // keratinocyte development // Golgi organization // regulation of mitotic nuclear division // nuclear migration // establishment or maintenance of cell polarity // epidermal growth factor receptor signaling pathway // small GTPase mediated signal transduction // axon guidance // blood coagulation // positive regulation of gene expre…	GO:0000139 // GO:0000322 // GO:0005737 // GO:0005789 // GO:0005815 // GO:0005829 // GO:0005886 // GO:0005886 // GO:0005911 // GO:0005925 // GO:0016020 // GO:0030141 // GO:0030175 // GO:0030496 // GO:0031256 // GO:0036464 // GO:0043005 // GO:0043025 // GO:0043209 // GO:0045177 // GO:0051233 // GO:0070062 // GO:0072686 // GO:0000139 // GO:0005622 // GO:0005737 // GO:0005819 // GO:0005829 // GO:0005…	Golgi membrane // storage vacuole // cytoplasm // endoplasmic reticulum membrane // microtubule organizing center // cytosol // plasma membrane // plasma membrane // cell-cell junction // focal adhesion // membrane // secretory granule // filopodium // midbody // leading edge membrane // cytoplasmic ribonucleoprotein granule // neuron projection // neuronal cell body // myelin sheath // apical pa…	GO:0003924 // GO:0005515 // GO:0005525 // GO:0019901 // GO:0019901 // GO:0030742 // GO:0031435 // GO:0031996 // GO:0034191 // GO:0042802 // GO:0061630 // GO:0000166 // GO:0005525 // GO:0019901	GTPase activity // protein binding // GTP binding // protein kinase binding // protein kinase binding // GTP-dependent protein binding // mitogen-activated protein kinase kinase kinase binding // thioesterase binding // apolipoprotein A-I receptor binding // identical protein binding // ubiquitin protein ligase activity // nucleotide binding // GTP binding // protein kinase binding	GenMAPP // GenMAPP	G13_Signaling_Pathway // Integrin-mediated_cell_adhesion_KEGG
TC0100007283.hg.1	519.319	500.227	ZBTB40	1p36	NM_001083621	RefSeq	Homo sapiens zinc finger and BTB domain containing 40 (ZBTB40), transcript variant 1, mRNA.	FALSE	Hs.418966	chr1	+	22451851	22531157	Q9NUA8	GO:0006351 // GO:0006355 // GO:0006974 // GO:0030282	transcription, DNA-templated // regulation of transcription, DNA-templated // cellular response to DNA damage stimulus // bone mineralization	GO:0005634 // GO:0005634	nucleus // nucleus	GO:0003677 // GO:0046872 // GO:0003674 // GO:0003676	DNA binding // metal ion binding // molecular_function // nucleic acid binding	---	---
TC0100007288.hg.1	16.1941	12.8973	EPHA8	1p36.12	NM_001006943	RefSeq	Homo sapiens EPH receptor A8 (EPHA8), transcript variant 2, mRNA.	FALSE	Hs.283613	chr1	+	22563511	22603594	P29322	GO:0006929 // GO:0007155 // GO:0007411 // GO:0007411 // GO:0016322 // GO:0018108 // GO:0030155 // GO:0031175 // GO:0033628 // GO:0043410 // GO:0043552 // GO:0046777 // GO:0048013 // GO:0048013 // GO:0006468 // GO:0007169 // GO:0007275 // GO:0007399 // GO:0016310 // GO:0048013	substrate-dependent cell migration // cell adhesion // axon guidance // axon guidance // neuron remodeling // peptidyl-tyrosine phosphorylation // regulation of cell adhesion // neuron projection development // regulation of cell adhesion mediated by integrin // positive regulation of MAPK cascade // positive regulation of phosphatidylinositol 3-kinase activity // protein autophosphorylation // e…	GO:0005886 // GO:0005887 // GO:0031901 // GO:0043005 // GO:0005768 // GO:0005886 // GO:0005887 // GO:0016020 // GO:0016021 // GO:0042995	plasma membrane // integral component of plasma membrane // early endosome membrane // neuron projection // endosome // plasma membrane // integral component of plasma membrane // membrane // integral component of membrane // cell projection	GO:0005004 // GO:0005524 // GO:0000166 // GO:0004672 // GO:0004713 // GO:0004714 // GO:0005003 // GO:0005004 // GO:0016301 // GO:0016740	GPI-linked ephrin receptor activity // ATP binding // nucleotide binding // protein kinase activity // protein tyrosine kinase activity // transmembrane receptor protein tyrosine kinase activity // ephrin receptor activity // GPI-linked ephrin receptor activity // kinase activity // transferase activity	---	---
TC0100007290.hg.1	41.3042	23.719	C1QA	1p36.12	NM_015991	RefSeq	Homo sapiens complement component 1, q subcomponent, A chain (C1QA), mRNA.	FALSE	Hs.632379	chr1	+	22636506	22639682	P02745	GO:0006956 // GO:0006958 // GO:0007267 // GO:0045087 // GO:0002376 // GO:0006958 // GO:0045087	complement activation // complement activation, classical pathway // cell-cell signaling // innate immune response // immune system process // complement activation, classical pathway // innate immune response	GO:0005576 // GO:0005581 // GO:0005602 // GO:0070062 // GO:0005576	extracellular region // collagen trimer // complement component C1 complex // extracellular exosome // extracellular region	GO:0005515	protein binding	GenMAPP	Complement_Activation_Classical
TC0100007291.hg.1	46.7238	42.7296	C1QC	1p36.11	NM_001114101	RefSeq	Homo sapiens complement component 1, q subcomponent, C chain (C1QC), transcript variant 1, mRNA.	FALSE	Hs.467753	chr1	+	22643625	22648110	P02747	GO:0006955 // GO:0006956 // GO:0006958 // GO:0030853 // GO:0045087 // GO:0045650 // GO:0002376 // GO:0006958 // GO:0045087	immune response // complement activation // complement activation, classical pathway // negative regulation of granulocyte differentiation // innate immune response // negative regulation of macrophage differentiation // immune system process // complement activation, classical pathway // innate immune response	GO:0005576 // GO:0005576 // GO:0005581 // GO:0005615 // GO:0070062 // GO:0072562 // GO:0005576	extracellular region // extracellular region // collagen trimer // extracellular space // extracellular exosome // blood microparticle // extracellular region	---	---	GenMAPP	Complement_Activation_Classical
TC0100007292.hg.1	29.2717	23.4065	C1QB	1p36.12	NM_000491	RefSeq	Homo sapiens complement component 1, q subcomponent, B chain (C1QB), mRNA.	FALSE	Hs.8986	chr1	+	22652762	22661538	P02746	GO:0006956 // GO:0006958 // GO:0045087 // GO:0048839 // GO:0002376 // GO:0006958 // GO:0045087	complement activation // complement activation, classical pathway // innate immune response // inner ear development // immune system process // complement activation, classical pathway // innate immune response	GO:0005576 // GO:0005581 // GO:0005602 // GO:0070062 // GO:0072562 // GO:0005576	extracellular region // collagen trimer // complement component C1 complex // extracellular exosome // blood microparticle // extracellular region	GO:0005515 // GO:0042803	protein binding // protein homodimerization activity	GenMAPP	Complement_Activation_Classical
TC0100007295.hg.1	13.4113	11.7509	EPHB2	1p36.1-p35	NM_001309192	RefSeq	Homo sapiens EPH receptor B2 (EPHB2), transcript variant 3, mRNA.	FALSE	Hs.523329	chr1	+	22710838	22921500	P29323	GO:0001525 // GO:0001655 // GO:0007399 // GO:0007411 // GO:0007411 // GO:0007413 // GO:0016310 // GO:0018108 // GO:0022038 // GO:0042472 // GO:0048013 // GO:0048013 // GO:0050878 // GO:0051965 // GO:0060021 // GO:0060996 // GO:0060997 // GO:0071679 // GO:0006468 // GO:0007169 // GO:0007275 // GO:0007399 // GO:0016310 // GO:0048013 // GO:0018108	angiogenesis // urogenital system development // nervous system development // axon guidance // axon guidance // axonal fasciculation // phosphorylation // peptidyl-tyrosine phosphorylation // corpus callosum development // inner ear morphogenesis // ephrin receptor signaling pathway // ephrin receptor signaling pathway // regulation of body fluid levels // positive regulation of synapse assembly…	GO:0005576 // GO:0005829 // GO:0005886 // GO:0005887 // GO:0030424 // GO:0030425 // GO:0005886 // GO:0005887 // GO:0016020 // GO:0016021 // GO:0030424 // GO:0030425 // GO:0042995	extracellular region // cytosol // plasma membrane // integral component of plasma membrane // axon // dendrite // plasma membrane // integral component of plasma membrane // membrane // integral component of membrane // axon // dendrite // cell projection	GO:0004713 // GO:0005005 // GO:0005005 // GO:0005515 // GO:0005524 // GO:0000166 // GO:0004672 // GO:0004713 // GO:0004714 // GO:0005003 // GO:0016301 // GO:0016740	protein tyrosine kinase activity // transmembrane-ephrin receptor activity // transmembrane-ephrin receptor activity // protein binding // ATP binding // nucleotide binding // protein kinase activity // protein tyrosine kinase activity // transmembrane receptor protein tyrosine kinase activity // ephrin receptor activity // kinase activity // transferase activity	---	---
TC0100007303.hg.1	990.785	876.407	KDM1A	1p36.12	NM_001009999	RefSeq	Homo sapiens lysine (K)-specific demethylase 1A (KDM1A), transcript variant 1, mRNA.	FALSE	Hs.591518	chr1	+	23019448	23083691	O60341	GO:0000122 // GO:0000122 // GO:0001701 // GO:0006325 // GO:0006351 // GO:0006357 // GO:0006482 // GO:0007264 // GO:0007596 // GO:0008283 // GO:0010569 // GO:0010725 // GO:0021983 // GO:0030851 // GO:0032091 // GO:0033169 // GO:0033184 // GO:0034644 // GO:0034720 // GO:0043392 // GO:0043433 // GO:0043433 // GO:0043518 // GO:0045648 // GO:0045654 // GO:0045892 // GO:0045944 // GO:0046886 // GO:0051…	negative regulation of transcription from RNA polymerase II promoter // negative regulation of transcription from RNA polymerase II promoter // in utero embryonic development // chromatin organization // transcription, DNA-templated // regulation of transcription from RNA polymerase II promoter // protein demethylation // small GTPase mediated signal transduction // blood coagulation // cell prol…	GO:0000790 // GO:0000790 // GO:0005634 // GO:0005654 // GO:0005654 // GO:0005667 // GO:0043234 // GO:1990391 // GO:0005634 // GO:0005667	nuclear chromatin // nuclear chromatin // nucleus // nucleoplasm // nucleoplasm // transcription factor complex // protein complex // DNA repair complex // nucleus // transcription factor complex	GO:0001085 // GO:0002039 // GO:0003682 // GO:0003700 // GO:0005515 // GO:0008134 // GO:0016491 // GO:0019899 // GO:0030374 // GO:0032451 // GO:0032452 // GO:0032452 // GO:0032453 // GO:0032454 // GO:0034648 // GO:0043426 // GO:0044212 // GO:0050660 // GO:0050681 // GO:0003677 // GO:0016491 // GO:0032452 // GO:0044212 // GO:0050660	RNA polymerase II transcription factor binding // p53 binding // chromatin binding // transcription factor activity, sequence-specific DNA binding // protein binding // transcription factor binding // oxidoreductase activity // enzyme binding // ligand-dependent nuclear receptor transcription coactivator activity // demethylase activity // histone demethylase activity // histone demethylase activ…	---	---
TC0100007305.hg.1	43.8923	50.1696	KDM1A	---	KDM1A.kAug10-unspliced	Ace View	Transcript Identified by AceView, Entrez Gene ID(s) 23028	FALSE	---	chr1	+	23075097	23076965	---	---	---	---	---	---	---	---	---
TC0100007315.hg.1	38.7566	40.7628	ZNF436-AS1	1p36.12	NR_033690	RefSeq	Homo sapiens ZNF436 antisense RNA 1 (ZNF436-AS1), transcript variant 1, long non-coding RNA.	FALSE	Hs.61884	chr1	+	23368967	23371839	Q8NC38	---	---	---	---	---	---	---	---
TC0100007326.hg.1	59454	61689.5	RPL11	1p36.1-p35	NM_000975	RefSeq	Homo sapiens ribosomal protein L11 (RPL11), transcript variant 1, mRNA.	FALSE	Hs.719951	chr1	+	23691779	23696426	P62913	GO:0000027 // GO:0000184 // GO:0006364 // GO:0006412 // GO:0006412 // GO:0006413 // GO:0006414 // GO:0006415 // GO:0006605 // GO:0006614 // GO:0010467 // GO:0016032 // GO:0019058 // GO:0019083 // GO:0034504 // GO:0042273 // GO:0044267 // GO:0000027 // GO:0006412	ribosomal large subunit assembly // nuclear-transcribed mRNA catabolic process, nonsense-mediated decay // rRNA processing // translation // translation // translational initiation // translational elongation // translational termination // protein targeting // SRP-dependent cotranslational protein targeting to membrane // gene expression // viral process // viral life cycle // viral transcriptio…	GO:0005730 // GO:0005737 // GO:0005829 // GO:0016020 // GO:0022625 // GO:0070062 // GO:0005622 // GO:0005634 // GO:0005730 // GO:0005840 // GO:0022625 // GO:0030529	nucleolus // cytoplasm // cytosol // membrane // cytosolic large ribosomal subunit // extracellular exosome // intracellular // nucleus // nucleolus // ribosome // cytosolic large ribosomal subunit // ribonucleoprotein complex	GO:0003723 // GO:0003735 // GO:0005515 // GO:0019843 // GO:0044822 // GO:0003723 // GO:0003735 // GO:0003735	RNA binding // structural constituent of ribosome // protein binding // rRNA binding // poly(A) RNA binding // RNA binding // structural constituent of ribosome // structural constituent of ribosome	GenMAPP // GenMAPP	Ribosomal_Proteins // Ribosomal_Proteins
TC0100007331.hg.1	427.919	557.474	TCEB3	1p36.1	NM_003198	RefSeq	Homo sapiens transcription elongation factor B (SIII), polypeptide 3 (110kDa, elongin A) (TCEB3), mRNA.	FALSE	Hs.15535	chr1	+	23743155	23762059	Q14241	GO:0006357 // GO:0006366 // GO:0006368 // GO:0006368 // GO:0010467 // GO:0016032 // GO:0042787 // GO:0050434 // GO:0006351 // GO:0006355 // GO:0006357 // GO:0006368 // GO:0042787	regulation of transcription from RNA polymerase II promoter // transcription from RNA polymerase II promoter // transcription elongation from RNA polymerase II promoter // transcription elongation from RNA polymerase II promoter // gene expression // viral process // protein ubiquitination involved in ubiquitin-dependent protein catabolic process // positive regulation of viral transcription // t…	GO:0005615 // GO:0005654 // GO:0016021 // GO:0070449 // GO:0005634 // GO:0070449	extracellular space // nucleoplasm // integral component of membrane // elongin complex // nucleus // elongin complex	GO:0003677 // GO:0004842 // GO:0005515 // GO:0004842	DNA binding // ubiquitin-protein transferase activity // protein binding // ubiquitin-protein transferase activity	---	---
TC0100007333.hg.1	4255.32	5015.22	PITHD1	1p36.11	NM_020362	RefSeq	Homo sapiens PITH (C-terminal proteasome-interacting domain of thioredoxin-like) domain containing 1 (PITHD1), mRNA.	FALSE	Hs.31819	chr1	+	23778386	23788232	Q9GZP4	---	---	GO:0005634	nucleus	---	---	---	---
TC0100007334.hg.1	7629.97	9097.11	LYPLA2	1p36.11	NM_007260	RefSeq	Homo sapiens lysophospholipase II (LYPLA2), mRNA.	FALSE	Hs.533479	chr1	+	23790970	23795539	O95372	GO:0002084 // GO:0006631 // GO:0002084 // GO:0006629	protein depalmitoylation // fatty acid metabolic process // protein depalmitoylation // lipid metabolic process	GO:0005737 // GO:0070062 // GO:0005737 // GO:0005737	cytoplasm // extracellular exosome // cytoplasm // cytoplasm	GO:0008474 // GO:0052689 // GO:0008474 // GO:0016787 // GO:0052689	palmitoyl-(protein) hydrolase activity // carboxylic ester hydrolase activity // palmitoyl-(protein) hydrolase activity // hydrolase activity // carboxylic ester hydrolase activity	---	---
TC0100007344.hg.1	6880.6	6874.3	PNRC2	1p36.11	NM_017761	RefSeq	Homo sapiens proline-rich nuclear receptor coactivator 2 (PNRC2), mRNA.	FALSE	Hs.7862 // Hs.512636	chr1	+	23959109	23963462	Q9NPJ4	GO:0000184 // GO:0006351 // GO:0006355 // GO:0031087 // GO:0000184 // GO:0001843 // GO:0001843 // GO:0003007 // GO:0003007 // GO:0006915 // GO:0006919 // GO:0007165 // GO:0007264 // GO:0008285 // GO:0008285 // GO:0008360 // GO:0021575 // GO:0021575 // GO:0030036 // GO:0030036 // GO:0030336 // GO:0030336 // GO:0030900 // GO:0030900 // GO:0032956 // GO:0035023 // GO:0035024 // GO:0035307 // GO:0043…	nuclear-transcribed mRNA catabolic process, nonsense-mediated decay // transcription, DNA-templated // regulation of transcription, DNA-templated // deadenylation-independent decapping of nuclear-transcribed mRNA // nuclear-transcribed mRNA catabolic process, nonsense-mediated decay // neural tube closure // neural tube closure // heart morphogenesis // heart morphogenesis // apoptotic process //…	GO:0000932 // GO:0005634 // GO:0000932 // GO:0005634 // GO:0005737 // GO:0005737 // GO:0005829 // GO:0005829 // GO:0005901 // GO:0005925 // GO:0005925 // GO:0016020 // GO:0030054 // GO:0030864 // GO:0032587	cytoplasmic mRNA processing body // nucleus // cytoplasmic mRNA processing body // nucleus // cytoplasm // cytoplasm // cytosol // cytosol // caveola // focal adhesion // focal adhesion // membrane // cell junction // cortical actin cytoskeleton // ruffle membrane	GO:0005515 // GO:0005096 // GO:0005096 // GO:0008289 // GO:0042169	protein binding // GTPase activator activity // GTPase activator activity // lipid binding // SH2 domain binding	---	---
TC0100007361.hg.1	24.306	25.9301	GRHL3	1p36.11	NM_001195010	RefSeq	Homo sapiens grainyhead-like transcription factor 3 (GRHL3), transcript variant 4, mRNA.	FALSE	Hs.657920	chr1	+	24319322	24364482	Q8TE85	GO:0001736 // GO:0001843 // GO:0006357 // GO:0006366 // GO:0007389 // GO:0007398 // GO:0007417 // GO:0008544 // GO:0032956 // GO:0042060 // GO:0043547 // GO:0045944 // GO:0061029 // GO:0061436 // GO:0090103 // GO:0090179 // GO:0001843 // GO:0006351 // GO:0006355 // GO:0006357 // GO:0008544 // GO:0010628 // GO:0045893 // GO:0045944	establishment of planar polarity // neural tube closure // regulation of transcription from RNA polymerase II promoter // transcription from RNA polymerase II promoter // pattern specification process // ectoderm development // central nervous system development // epidermis development // regulation of actin cytoskeleton organization // wound healing // positive regulation of GTPase activity // …	GO:0005634 // GO:0005654 // GO:0005737 // GO:0005634	nucleus // nucleoplasm // cytoplasm // nucleus	GO:0001228 // GO:0003700 // GO:0005515 // GO:0031490 // GO:0043565 // GO:0043565 // GO:0000981 // GO:0003677 // GO:0003700 // GO:0043565 // GO:0043565	transcriptional activator activity, RNA polymerase II transcription regulatory region sequence-specific binding // transcription factor activity, sequence-specific DNA binding // protein binding // chromatin DNA binding // sequence-specific DNA binding // sequence-specific DNA binding // RNA polymerase II transcription factor activity, sequence-specific DNA binding // DNA binding // transcription…	---	---
TC0100007365.hg.1	170.9	205.203	NIPAL3	1p36.12-p35.1	NM_020448	RefSeq	Homo sapiens NIPA-like domain containing 3 (NIPAL3), mRNA.	FALSE	Hs.523442	chr1	+	24415755	24472983	Q6P499	GO:0015693 // GO:1903830	magnesium ion transport // magnesium ion transmembrane transport	GO:0016021 // GO:0016020	integral component of membrane // membrane	GO:0005515 // GO:0015095	protein binding // magnesium ion transmembrane transporter activity	---	---
TC0100007370.hg.1	22.6459	27.614	RCAN3	1p36.11	NM_001251977	RefSeq	Homo sapiens RCAN family member 3 (RCAN3), transcript variant 2, mRNA.	FALSE	Hs.656799 // Hs.737226	chr1	+	24502351	24541040	Q9UKA8	GO:0009653 // GO:0019722 // GO:0050790 // GO:0070884 // GO:0050790 // GO:0070884	anatomical structure morphogenesis // calcium-mediated signaling // regulation of catalytic activity // regulation of calcineurin-NFAT signaling cascade // regulation of catalytic activity // regulation of calcineurin-NFAT signaling cascade	GO:0005737 // GO:0005737 // GO:0005622	cytoplasm // cytoplasm // intracellular	GO:0003723 // GO:0005515 // GO:0008597 // GO:0031013 // GO:0008597 // GO:0000166	RNA binding // protein binding // calcium-dependent protein serine/threonine phosphatase regulator activity // troponin I binding // calcium-dependent protein serine/threonine phosphatase regulator activity // nucleotide binding	---	---
TC0100007372.hg.1	65.7583	49.2295	NCMAP	1p36.11	NM_001010980	RefSeq	Homo sapiens noncompact myelin associated protein (NCMAP), mRNA.	FALSE	Hs.200253	chr1	+	24556076	24609328	Q5T1S8	GO:0031643 // GO:0032290	positive regulation of myelination // peripheral nervous system myelin formation	GO:0005887 // GO:0033270 // GO:0043220 // GO:0005886 // GO:0016020 // GO:0016021	integral component of plasma membrane // paranode region of axon // Schmidt-Lanterman incisure // plasma membrane // membrane // integral component of membrane	GO:0019911	structural constituent of myelin sheath	---	---
TC0100007378.hg.1	694.987	789.5	CLIC4	1p36.11	NM_013943	RefSeq	Homo sapiens chloride intracellular channel 4 (CLIC4), mRNA.	FALSE	Hs.440544	chr1	+	24745269	24844324	Q9Y696	GO:0001525 // GO:0001886 // GO:0006749 // GO:0006821 // GO:0006915 // GO:0007035 // GO:0009566 // GO:0030154 // GO:0030216 // GO:0030336 // GO:0034765 // GO:0035088 // GO:0035264 // GO:0048754 // GO:0051493 // GO:0061299 // GO:0071277 // GO:1902476 // GO:0001525 // GO:0001525 // GO:0006749 // GO:0006810 // GO:0006811 // GO:0006821 // GO:1902476 // GO:1902476	angiogenesis // endothelial cell morphogenesis // glutathione metabolic process // chloride transport // apoptotic process // vacuolar acidification // fertilization // cell differentiation // keratinocyte differentiation // negative regulation of cell migration // regulation of ion transmembrane transport // establishment or maintenance of apical/basal cell polarity // multicellular organism gro…	GO:0005622 // GO:0005737 // GO:0005739 // GO:0005813 // GO:0005829 // GO:0005886 // GO:0005902 // GO:0005911 // GO:0009986 // GO:0015629 // GO:0015630 // GO:0016363 // GO:0030496 // GO:0030659 // GO:0034707 // GO:0045177 // GO:0048471 // GO:0070062 // GO:0005634 // GO:0005737 // GO:0005739 // GO:0005815 // GO:0005856 // GO:0005886 // GO:0016020 // GO:0016021 // GO:0016363 // GO:0030054 // GO:0031…	intracellular // cytoplasm // mitochondrion // centrosome // cytosol // plasma membrane // microvillus // cell-cell junction // cell surface // actin cytoskeleton // microtubule cytoskeleton // nuclear matrix // midbody // cytoplasmic vesicle membrane // chloride channel complex // apical part of cell // perinuclear region of cytoplasm // extracellular exosome // nucleus // cytoplasm // mitochond…	GO:0004364 // GO:0005244 // GO:0005254 // GO:0005515 // GO:0004364 // GO:0005254	glutathione transferase activity // voltage-gated ion channel activity // chloride channel activity // protein binding // glutathione transferase activity // chloride channel activity	---	---
TC0100007396.hg.1	28.8422	24.281	RHD	1p36.11	NM_001127691	RefSeq	Homo sapiens Rh blood group, D antigen (RHD), transcript variant 2, mRNA.	FALSE	Hs.449968	chr1	+	25272393	25330445	P18577	GO:0072488 // GO:0015696	ammonium transmembrane transport // ammonium transport	GO:0005887 // GO:0016020 // GO:0016021	integral component of plasma membrane // membrane // integral component of membrane	GO:0008519	ammonium transmembrane transporter activity	---	---
TC0100007398.hg.1	18242.6	19200.4	TMEM50A	1p36.11	NM_014313	RefSeq	Homo sapiens transmembrane protein 50A (TMEM50A), mRNA.	FALSE	Hs.705699	chr1	+	25337917	25362361	O95807	---	---	GO:0005783 // GO:0016021 // GO:0005737 // GO:0016020	endoplasmic reticulum // integral component of membrane // cytoplasm // membrane	---	---	---	---
TC0100007403.hg.1	1273.54	1071.77	TMEM57	1p36.11|1p36.11	NM_001282564	RefSeq	Homo sapiens transmembrane protein 57 (TMEM57), transcript variant 2, mRNA.	FALSE	Hs.189782	chr1	+	25430858	25500209	Q8N5G2	GO:0007420 // GO:0008150	brain development // biological_process	GO:0005634 // GO:0016021 // GO:0030424 // GO:0031965 // GO:0044306 // GO:0045202 // GO:0005634 // GO:0016020 // GO:0031965 // GO:0042995 // GO:0043005 // GO:0044306 // GO:0045202	nucleus // integral component of membrane // axon // nuclear membrane // neuron projection terminus // synapse // nucleus // membrane // nuclear membrane // cell projection // neuron projection // neuron projection terminus // synapse	GO:0003674	molecular_function	---	---
TC0100007406.hg.1	369.792	351.748	LDLRAP1	1p36.11	NM_015627	RefSeq	Homo sapiens low density lipoprotein receptor adaptor protein 1 (LDLRAP1), mRNA.	FALSE	Hs.590911	chr1	+	25543580	25568886	Q5SW96	GO:0006810 // GO:0006898 // GO:0008203 // GO:0009967 // GO:0031623 // GO:0042632 // GO:0042982 // GO:0043393 // GO:0048260 // GO:0090003 // GO:0090118 // GO:0090205 // GO:0006629 // GO:0006897 // GO:0008202 // GO:0008203	transport // receptor-mediated endocytosis // cholesterol metabolic process // positive regulation of signal transduction // receptor internalization // cholesterol homeostasis // amyloid precursor protein metabolic process // regulation of protein binding // positive regulation of receptor-mediated endocytosis // regulation of establishment of protein localization to plasma membrane // receptor-…	GO:0005769 // GO:0005829 // GO:0005883 // GO:0009898 // GO:0009925 // GO:0030121 // GO:0030122 // GO:0030424 // GO:0055037 // GO:0005737 // GO:0005883 // GO:0030424	early endosome // cytosol // neurofilament // cytoplasmic side of plasma membrane // basal plasma membrane // AP-1 adaptor complex // AP-2 adaptor complex // axon // recycling endosome // cytoplasm // neurofilament // axon	GO:0001540 // GO:0001784 // GO:0005515 // GO:0005546 // GO:0030159 // GO:0030276 // GO:0035591 // GO:0035612 // GO:0035615 // GO:0050750	beta-amyloid binding // phosphotyrosine binding // protein binding // phosphatidylinositol-4,5-bisphosphate binding // receptor signaling complex scaffold activity // clathrin binding // signaling adaptor activity // AP-2 adaptor complex binding // clathrin adaptor activity // low-density lipoprotein particle receptor binding	---	---
TC0100007412.hg.1	14.1323	15.7447	MAN1C1	1p35	NM_001289010	RefSeq	Homo sapiens mannosidase, alpha, class 1C, member 1 (MAN1C1), transcript variant 2, mRNA.	FALSE	Hs.197043	chr1	+	25617468	25786207	Q9NR34	GO:0006487 // GO:0006491 // GO:0018279 // GO:0043687 // GO:0044267 // GO:0006486 // GO:0006491 // GO:0008152	protein N-linked glycosylation // N-glycan processing // protein N-linked glycosylation via asparagine // post-translational protein modification // cellular protein metabolic process // protein glycosylation // N-glycan processing // metabolic process	GO:0000139 // GO:0005783 // GO:0030173 // GO:0070062 // GO:0000139 // GO:0005783 // GO:0005794 // GO:0016020 // GO:0016021	Golgi membrane // endoplasmic reticulum // integral component of Golgi membrane // extracellular exosome // Golgi membrane // endoplasmic reticulum // Golgi apparatus // membrane // integral component of membrane	GO:0004571 // GO:0005509 // GO:0004571 // GO:0005509 // GO:0016787 // GO:0016798	mannosyl-oligosaccharide 1,2-alpha-mannosidase activity // calcium ion binding // mannosyl-oligosaccharide 1,2-alpha-mannosidase activity // calcium ion binding // hydrolase activity // hydrolase activity, acting on glycosyl bonds	---	---
TC0100007434.hg.1	10.6537	9.93134	EXTL1	1p36.1	NM_004455	RefSeq	Homo sapiens exostosin-like glycosyltransferase 1 (EXTL1), mRNA.	FALSE	Hs.150956	chr1	+	26019884	26036464	Q92935	GO:0001501 // GO:0006024 // GO:0006486 // GO:0015012	skeletal system development // glycosaminoglycan biosynthetic process // protein glycosylation // heparan sulfate proteoglycan biosynthetic process	GO:0005789 // GO:0016021 // GO:0005783 // GO:0016020	endoplasmic reticulum membrane // integral component of membrane // endoplasmic reticulum // membrane	GO:0050508 // GO:0016740 // GO:0016757	glucuronosyl-N-acetylglucosaminyl-proteoglycan 4-alpha-N-acetylglucosaminyltransferase activity // transferase activity // transferase activity, transferring glycosyl groups	MetaCyc	PWY-6558
TC0100007439.hg.1	353.52	462.16	PDIK1L	1p36.11	NM_001243532	RefSeq	Homo sapiens PDLIM1 interacting kinase 1 like (PDIK1L), transcript variant 2, mRNA.	FALSE	Hs.468801	chr1	+	26111165	26125548	Q8N165	GO:0006468 // GO:0016310	protein phosphorylation // phosphorylation	GO:0005654 // GO:0005634	nucleoplasm // nucleus	GO:0004674 // GO:0005515 // GO:0005524 // GO:0000166 // GO:0004672 // GO:0016301 // GO:0016740	protein serine/threonine kinase activity // protein binding // ATP binding // nucleotide binding // protein kinase activity // kinase activity // transferase activity	---	---
TC0100007440.hg.1	17.3289	10.5615	FAM110D	1p36.11	NM_024869	RefSeq	Homo sapiens family with sequence similarity 110, member D (FAM110D), mRNA.	FALSE	Hs.694119	chr1	+	26159020	26162628	Q8TAY7	---	---	---	---	---	---	---	---
TC0100007442.hg.1	43.8668	38.4547	ZNF593	1p36.11	NM_015871	RefSeq	Homo sapiens zinc finger protein 593 (ZNF593), mRNA.	FALSE	Hs.477273	chr1	+	26169871	26172060	O00488	GO:0000122 // GO:0006351 // GO:0098779 // GO:0006355	negative regulation of transcription from RNA polymerase II promoter // transcription, DNA-templated // mitophagy in response to mitochondrial depolarization // regulation of transcription, DNA-templated	GO:0005634 // GO:0005730 // GO:0005634 // GO:0005730	nucleus // nucleolus // nucleus // nucleolus	GO:0003677 // GO:0003714 // GO:0005515 // GO:0046872	DNA binding // transcription corepressor activity // protein binding // metal ion binding	---	---
TC0100007444.hg.1	10.1478	12.1848	CNKSR1	1p36.11	NM_001297647	RefSeq	Homo sapiens connector enhancer of kinase suppressor of Ras 1 (CNKSR1), transcript variant 3, mRNA.	FALSE	Hs.16232	chr1	+	26177403	26189886	Q969H4	GO:0007169 // GO:0007265 // GO:0007266 // GO:0016310	transmembrane receptor protein tyrosine kinase signaling pathway // Ras protein signal transduction // Rho protein signal transduction // phosphorylation	GO:0005886 // GO:0005911 // GO:0005938 // GO:0005737 // GO:0016020	plasma membrane // cell-cell junction // cell cortex // cytoplasm // membrane	GO:0005515 // GO:0030674 // GO:0016301	protein binding // protein binding, bridging // kinase activity	---	---
TC0100007445.hg.1	11.4149	11.683	CATSPER4	1p35.3	NM_198137	RefSeq	Homo sapiens cation channel, sperm associated 4 (CATSPER4), mRNA.	FALSE	Hs.123532	chr1	+	26190561	26202968	Q7RTX7	GO:0006814 // GO:0007275 // GO:0007338 // GO:0030317 // GO:0032504 // GO:0034765 // GO:0035036 // GO:0048240 // GO:0070509 // GO:0070588 // GO:0086010 // GO:0006810 // GO:0006811 // GO:0006816 // GO:0007283 // GO:0030154 // GO:0030317 // GO:0030317 // GO:0055085 // GO:0070509 // GO:0086010	sodium ion transport // multicellular organismal development // single fertilization // sperm motility // multicellular organism reproduction // regulation of ion transmembrane transport // sperm-egg recognition // sperm capacitation // calcium ion import // calcium ion transmembrane transport // membrane depolarization during action potential // transport // ion transport // calcium ion transpor…	GO:0001669 // GO:0005886 // GO:0005886 // GO:0036128 // GO:0097228 // GO:0005886 // GO:0005886 // GO:0005929 // GO:0016020 // GO:0016021 // GO:0031514 // GO:0036128 // GO:0042995	acrosomal vesicle // plasma membrane // plasma membrane // CatSper complex // sperm principal piece // plasma membrane // plasma membrane // cilium // membrane // integral component of membrane // motile cilium // CatSper complex // cell projection	GO:0005227 // GO:0005245 // GO:0005216 // GO:0005244 // GO:0005245 // GO:0005245 // GO:0005262	calcium activated cation channel activity // voltage-gated calcium channel activity // ion channel activity // voltage-gated ion channel activity // voltage-gated calcium channel activity // voltage-gated calcium channel activity // calcium channel activity	---	---
TC0100007447.hg.1	332.594	303.886	CEP85	1p36.11	NM_001281517	RefSeq	Homo sapiens centrosomal protein 85kDa (CEP85), transcript variant 2, mRNA.	FALSE	Hs.63795	chr1	+	26234153	26279038	Q6P2H3	---	---	GO:0000922 // GO:0005730 // GO:0005737 // GO:0005794 // GO:0005813 // GO:0000922 // GO:0005634 // GO:0005730 // GO:0005737 // GO:0005813 // GO:0005815 // GO:0005856	spindle pole // nucleolus // cytoplasm // Golgi apparatus // centrosome // spindle pole // nucleus // nucleolus // cytoplasm // centrosome // microtubule organizing center // cytoskeleton	GO:0005515	protein binding	---	---
TC0100007449.hg.1	75157.9	78627.1	SH3BGRL3	1p36.11	NM_031286	RefSeq	Homo sapiens SH3 domain binding glutamate-rich protein like 3 (SH3BGRL3), mRNA.	FALSE	Hs.109051	chr1	+	26279176	26281522	Q9H299	GO:0030834 // GO:0032956 // GO:0043535 // GO:0043547 // GO:0045454 // GO:0055114	regulation of actin filament depolymerization // regulation of actin cytoskeleton organization // regulation of blood vessel endothelial cell migration // positive regulation of GTPase activity // cell redox homeostasis // oxidation-reduction process	GO:0005634 // GO:0005737 // GO:0030027 // GO:0070062 // GO:0005623	nucleus // cytoplasm // lamellipodium // extracellular exosome // cell	GO:0005096 // GO:0009055 // GO:0015035 // GO:0030215	GTPase activator activity // electron carrier activity // protein disulfide oxidoreductase activity // semaphorin receptor binding	---	---
TC0100007451.hg.1	51764.5	56134.6	CD52	1p36	NM_001803	RefSeq	Homo sapiens CD52 molecule (CD52), mRNA.	FALSE	Hs.276770	chr1	+	26317920	26320523	P31358	GO:0007204 // GO:0045730	positive regulation of cytosolic calcium ion concentration // respiratory burst	GO:0005829 // GO:0005887 // GO:0016020 // GO:0031225 // GO:0005886 // GO:0016020 // GO:0016021	cytosol // integral component of plasma membrane // membrane // anchored component of membrane // plasma membrane // membrane // integral component of membrane	---	---	---	---
TC0100007457.hg.1	63.4159	52.4316	LIN28A	1p36.11	NM_024674	RefSeq	Homo sapiens lin-28 homolog A (C. elegans) (LIN28A), mRNA.	FALSE	Hs.86154	chr1	+	26410778	26429728	Q9H9Z2	GO:0006355 // GO:0007281 // GO:0010587 // GO:0019827 // GO:0031054 // GO:0031123 // GO:0035019 // GO:0045666 // GO:0045686 // GO:0045727 // GO:0048863 // GO:0060964 // GO:1901724 // GO:0010586 // GO:0031047	regulation of transcription, DNA-templated // germ cell development // miRNA catabolic process // stem cell population maintenance // pre-miRNA processing // RNA 3'-end processing // somatic stem cell population maintenance // positive regulation of neuron differentiation // negative regulation of glial cell differentiation // positive regulation of translation // stem cell differentiation // reg…	GO:0000932 // GO:0005634 // GO:0005730 // GO:0005737 // GO:0005829 // GO:0010494 // GO:0005634 // GO:0005737	cytoplasmic mRNA processing body // nucleus // nucleolus // cytoplasm // cytosol // cytoplasmic stress granule // nucleus // cytoplasm	GO:0003677 // GO:0003723 // GO:0003729 // GO:0005515 // GO:0008270 // GO:0031369 // GO:0035198 // GO:0003676 // GO:0003723 // GO:0046872	DNA binding // RNA binding // mRNA binding // protein binding // zinc ion binding // translation initiation factor binding // miRNA binding // nucleic acid binding // RNA binding // metal ion binding	---	---
TC0100007458.hg.1	2711.89	2560.26	DHDDS	1p36.11	NM_001243564	RefSeq	Homo sapiens dehydrodolichyl diphosphate synthase subunit (DHDDS), transcript variant 3, mRNA.	FALSE	Hs.369385	chr1	+	26432282	26471304	Q86SQ9	GO:0006488 // GO:0006489 // GO:0018279 // GO:0043687 // GO:0044267 // GO:0006486	dolichol-linked oligosaccharide biosynthetic process // dolichyl diphosphate biosynthetic process // protein N-linked glycosylation via asparagine // post-translational protein modification // cellular protein metabolic process // protein glycosylation	GO:0005789 // GO:0005783 // GO:0005789 // GO:0016020	endoplasmic reticulum membrane // endoplasmic reticulum // endoplasmic reticulum membrane // membrane	GO:0002094 // GO:0005515 // GO:0016740 // GO:0016765	polyprenyltransferase activity // protein binding // transferase activity // transferase activity, transferring alkyl or aryl (other than methyl) groups	---	---
TC0100007463.hg.1	40185.3	41414.1	HMGN2	1p36.1	NM_005517	RefSeq	Homo sapiens high mobility group nucleosomal binding domain 2 (HMGN2), mRNA.	FALSE	Hs.181163	chr1	+	26472411	26476642	P05204	---	---	GO:0000785 // GO:0005634 // GO:0005737	chromatin // nucleus // cytoplasm	GO:0005515 // GO:0031492 // GO:0044822 // GO:0003677	protein binding // nucleosomal DNA binding // poly(A) RNA binding // DNA binding	---	---
TC0100007469.hg.1	10168.3	12761.9	RPS6KA1	1p	NM_001006665	RefSeq	Homo sapiens ribosomal protein S6 kinase, 90kDa, polypeptide 1 (RPS6KA1), transcript variant 2, mRNA.	FALSE	Hs.149957	chr1	+	26529758	26575030	Q15418	GO:0002224 // GO:0002755 // GO:0002756 // GO:0006468 // GO:0007049 // GO:0007165 // GO:0007268 // GO:0007411 // GO:0030307 // GO:0034134 // GO:0034138 // GO:0034142 // GO:0034146 // GO:0034162 // GO:0034166 // GO:0035556 // GO:0035666 // GO:0038123 // GO:0038124 // GO:0043066 // GO:0043154 // GO:0043555 // GO:0043620 // GO:0045087 // GO:0045597 // GO:0045944 // GO:0048011 // GO:0051403 // GO:0072…	toll-like receptor signaling pathway // MyD88-dependent toll-like receptor signaling pathway // MyD88-independent toll-like receptor signaling pathway // protein phosphorylation // cell cycle // signal transduction // synaptic transmission // axon guidance // positive regulation of cell growth // toll-like receptor 2 signaling pathway // toll-like receptor 3 signaling pathway // toll-like recepto…	GO:0005634 // GO:0005654 // GO:0005737 // GO:0005819 // GO:0005829 // GO:0005634 // GO:0005737 // GO:0005840	nucleus // nucleoplasm // cytoplasm // spindle // cytosol // nucleus // cytoplasm // ribosome	GO:0000287 // GO:0004674 // GO:0004711 // GO:0004712 // GO:0005515 // GO:0005524 // GO:0043027 // GO:0000166 // GO:0004672 // GO:0004674 // GO:0004674 // GO:0004711 // GO:0016301 // GO:0016740 // GO:0046872	magnesium ion binding // protein serine/threonine kinase activity // ribosomal protein S6 kinase activity // protein serine/threonine/tyrosine kinase activity // protein binding // ATP binding // cysteine-type endopeptidase inhibitor activity involved in apoptotic process // nucleotide binding // protein kinase activity // protein serine/threonine kinase activity // protein serine/threonine kinas…	GenMAPP	Ribosomal_Proteins
TC0100007471.hg.1	162.701	146.101	RPS6KA1	---	hsa_circ_0092329	circbase	Zhang2013 ALT_ACCEPTOR, ALT_DONOR, coding, INTERNAL, intronic best transcript NM_002953	FALSE	---	chr1	+	26572454	26572673	---	---	---	---	---	---	---	---	---
TC0100007477.hg.1	5686.12	6194.1	ARID1A	1p35.3	NM_006015	RefSeq	Homo sapiens AT rich interactive domain 1A (SWI-like) (ARID1A), transcript variant 1, mRNA.	FALSE	Hs.468972	chr1	+	26696031	26782110	O14497	GO:0000122 // GO:0001843 // GO:0003205 // GO:0003408 // GO:0006337 // GO:0006338 // GO:0006344 // GO:0006351 // GO:0006357 // GO:0030520 // GO:0030521 // GO:0030900 // GO:0042766 // GO:0042921 // GO:0043044 // GO:0045893 // GO:0048096 // GO:0055007 // GO:0060674 // GO:1901998 // GO:0006325 // GO:0006338 // GO:0006355 // GO:0007399 // GO:0016568	negative regulation of transcription from RNA polymerase II promoter // neural tube closure // cardiac chamber development // optic cup formation involved in camera-type eye development // nucleosome disassembly // chromatin remodeling // maintenance of chromatin silencing // transcription, DNA-templated // regulation of transcription from RNA polymerase II promoter // intracellular estrogen rece…	GO:0000790 // GO:0005634 // GO:0005654 // GO:0016514 // GO:0071564 // GO:0071565 // GO:0005634 // GO:0071564 // GO:0071565 // GO:0090544	nuclear chromatin // nucleus // nucleoplasm // SWI/SNF complex // npBAF complex // nBAF complex // nucleus // npBAF complex // nBAF complex // BAF-type complex	GO:0003677 // GO:0003677 // GO:0003713 // GO:0005515 // GO:0016922 // GO:0031491 // GO:0003677	DNA binding // DNA binding // transcription coactivator activity // protein binding // ligand-dependent nuclear receptor binding // nucleosome binding // DNA binding	---	---
TC0100007481.hg.1	151.031	202.549	PIGV	1p36.11	NM_001202554	RefSeq	Homo sapiens phosphatidylinositol glycan anchor biosynthesis, class V (PIGV), transcript variant 1, mRNA.	FALSE	Hs.259605	chr1	+	26787472	26798403	Q9NUD9	GO:0006501 // GO:0006506 // GO:0006506 // GO:0016254 // GO:0043687 // GO:0044267 // GO:0097502 // GO:0097502 // GO:0097502 // GO:0006506	C-terminal protein lipidation // GPI anchor biosynthetic process // GPI anchor biosynthetic process // preassembly of GPI anchor in ER membrane // post-translational protein modification // cellular protein metabolic process // mannosylation // mannosylation // mannosylation // GPI anchor biosynthetic process	GO:0005789 // GO:0005789 // GO:0016021 // GO:0031501 // GO:0005783 // GO:0005789 // GO:0016020 // GO:0016021 // GO:0031501	endoplasmic reticulum membrane // endoplasmic reticulum membrane // integral component of membrane // mannosyltransferase complex // endoplasmic reticulum // endoplasmic reticulum membrane // membrane // integral component of membrane // mannosyltransferase complex	GO:0000030 // GO:0000030 // GO:0004584 // GO:0016740 // GO:0016757	mannosyltransferase activity // mannosyltransferase activity // dolichyl-phosphate-mannose-glycolipid alpha-mannosyltransferase activity // transferase activity // transferase activity, transferring glycosyl groups	---	---
TC0100007484.hg.1	4776.81	4811.24	ZDHHC18	1p36.11	NM_032283	RefSeq	Homo sapiens zinc finger, DHHC-type containing 18 (ZDHHC18), mRNA.	FALSE	Hs.523710	chr1	+	26826710	26857602	Q9NUE0	GO:0006612 // GO:0018230 // GO:0018345 // GO:0006612 // GO:0018230 // GO:0034613	protein targeting to membrane // peptidyl-L-cysteine S-palmitoylation // protein palmitoylation // protein targeting to membrane // peptidyl-L-cysteine S-palmitoylation // cellular protein localization	GO:0005783 // GO:0005794 // GO:0016021 // GO:0005783 // GO:0016020	endoplasmic reticulum // Golgi apparatus // integral component of membrane // endoplasmic reticulum // membrane	GO:0008270 // GO:0016409 // GO:0019706 // GO:0016740 // GO:0016746 // GO:0019706 // GO:0019706 // GO:0046872	zinc ion binding // palmitoyltransferase activity // protein-cysteine S-palmitoyltransferase activity // transferase activity // transferase activity, transferring acyl groups // protein-cysteine S-palmitoyltransferase activity // protein-cysteine S-palmitoyltransferase activity // metal ion binding	---	---
TC0100007486.hg.1	55.3393	88.8566	SFN	1p36.11	NM_006142	RefSeq	Homo sapiens stratifin (SFN), mRNA.	FALSE	Hs.523718	chr1	+	26863138	26864457	P31947	GO:0000079 // GO:0001836 // GO:0003334 // GO:0006367 // GO:0006469 // GO:0006915 // GO:0007165 // GO:0007264 // GO:0008630 // GO:0010467 // GO:0010482 // GO:0010839 // GO:0012501 // GO:0030307 // GO:0031424 // GO:0043154 // GO:0045606 // GO:0046827 // GO:0061024 // GO:0061436 // GO:0071901 // GO:0097193 // GO:1900740 // GO:0010482 // GO:0030216 // GO:0043588 // GO:0045606 // GO:0051726 // GO:0061…	regulation of cyclin-dependent protein serine/threonine kinase activity // release of cytochrome c from mitochondria // keratinocyte development // transcription initiation from RNA polymerase II promoter // negative regulation of protein kinase activity // apoptotic process // signal transduction // small GTPase mediated signal transduction // intrinsic apoptotic signaling pathway in response to…	GO:0005615 // GO:0005634 // GO:0005737 // GO:0005829 // GO:0030659 // GO:0070062 // GO:0005576 // GO:0005737	extracellular space // nucleus // cytoplasm // cytosol // cytoplasmic vesicle membrane // extracellular exosome // extracellular region // cytoplasm	GO:0005515 // GO:0008426 // GO:0019901 // GO:0019904 // GO:0051219	protein binding // protein kinase C inhibitor activity // protein kinase binding // protein domain specific binding // phosphoprotein binding	GenMAPP // GenMAPP	Calcium_regulation_in_cardiac_cells // Smooth_muscle_contraction
TC0100007489.hg.1	1193.25	1332.27	NUDC	1p36.11	NM_006600	RefSeq	Homo sapiens nudC nuclear distribution protein (NUDC), mRNA.	FALSE	Hs.263812	chr1	+	26900238	26946871	Q9Y266	GO:0000278 // GO:0007067 // GO:0007264 // GO:0007275 // GO:0008283 // GO:0051301 // GO:0007049	mitotic cell cycle // mitotic nuclear division // small GTPase mediated signal transduction // multicellular organismal development // cell proliferation // cell division // cell cycle	GO:0005654 // GO:0005737 // GO:0005829 // GO:0005874 // GO:0005634 // GO:0005737 // GO:0005856	nucleoplasm // cytoplasm // cytosol // microtubule // nucleus // cytoplasm // cytoskeleton	GO:0005515	protein binding	---	---
TC0100007493.hg.1	12.4901	9.86177	TRNP1	1p36.11	NM_001013642	RefSeq	Homo sapiens TMF1-regulated nuclear protein 1 (TRNP1), mRNA.	FALSE	Hs.355747	chr1	+	26993704	27000898	Q6NT89	GO:0006351 // GO:0006355 // GO:0007049 // GO:0021696 // GO:0042127 // GO:0051726 // GO:0061351 // GO:0007275 // GO:0007399 // GO:0021696 // GO:0042127 // GO:0051726 // GO:0061351	transcription, DNA-templated // regulation of transcription, DNA-templated // cell cycle // cerebellar cortex morphogenesis // regulation of cell proliferation // regulation of cell cycle // neural precursor cell proliferation // multicellular organismal development // nervous system development // cerebellar cortex morphogenesis // regulation of cell proliferation // regulation of cell cycle // …	GO:0005634 // GO:0005634 // GO:0005719 // GO:0005634 // GO:0005634 // GO:0005719	nucleus // nucleus // nuclear euchromatin // nucleus // nucleus // nuclear euchromatin	GO:0003677 // GO:0003677	DNA binding // DNA binding	---	---
TC0100007505.hg.1	3392.33	3475.69	WDTC1	1p36.11	NM_001276252	RefSeq	Homo sapiens WD and tetratricopeptide repeats 1 (WDTC1), transcript variant 1, mRNA.	FALSE	Hs.469154	chr1	+	27234516	27308633	Q8N5D0	GO:0000122 // GO:0001701 // GO:0006006 // GO:0008361 // GO:0016567 // GO:0032869 // GO:0035264 // GO:0043086 // GO:0045717 // GO:0055082	negative regulation of transcription from RNA polymerase II promoter // in utero embryonic development // glucose metabolic process // regulation of cell size // protein ubiquitination // cellular response to insulin stimulus // multicellular organism growth // negative regulation of catalytic activity // negative regulation of fatty acid biosynthetic process // cellular chemical homeostasis	GO:0005634 // GO:0005829	nucleus // cytosol	GO:0004857 // GO:0005515 // GO:0042393 // GO:0042826	enzyme inhibitor activity // protein binding // histone binding // histone deacetylase binding	---	---
TC0100007507.hg.1	2006.81	1766.91	TMEM222	1p36.11	NM_032125	RefSeq	Homo sapiens transmembrane protein 222 (TMEM222), transcript variant 1, mRNA.	FALSE	Hs.469171	chr1	+	27322145	27336400	Q9H0R3	---	---	GO:0016021 // GO:0016020	integral component of membrane // membrane	---	---	---	---
TC0100007510.hg.1	74.2703	58.0418	SYTL1	1p36.11	NM_001193308	RefSeq	Homo sapiens synaptotagmin-like 1 (SYTL1), transcript variant 1, mRNA.	FALSE	Hs.469175	chr1	+	27341992	27353937	Q8IYJ3	GO:0006886 // GO:0006887 // GO:0006906 // GO:0016079 // GO:0017158 // GO:0048791 // GO:0006887 // GO:0006906 // GO:0016079 // GO:0017158 // GO:0048791	intracellular protein transport // exocytosis // vesicle fusion // synaptic vesicle exocytosis // regulation of calcium ion-dependent exocytosis // calcium ion-dependent exocytosis of neurotransmitter // exocytosis // vesicle fusion // synaptic vesicle exocytosis // regulation of calcium ion-dependent exocytosis // calcium ion-dependent exocytosis of neurotransmitter	GO:0005886 // GO:0019897 // GO:0042470 // GO:0070062 // GO:0070382 // GO:0005886 // GO:0016020 // GO:0070382 // GO:0005622 // GO:0005623	plasma membrane // extrinsic component of plasma membrane // melanosome // extracellular exosome // exocytic vesicle // plasma membrane // membrane // exocytic vesicle // intracellular // cell	GO:0005509 // GO:0005515 // GO:0005544 // GO:0017137 // GO:0019905 // GO:0030276 // GO:0042043 // GO:0005509 // GO:0005544 // GO:0019905 // GO:0030276	calcium ion binding // protein binding // calcium-dependent phospholipid binding // Rab GTPase binding // syntaxin binding // clathrin binding // neurexin family protein binding // calcium ion binding // calcium-dependent phospholipid binding // syntaxin binding // clathrin binding	---	---
TC0100007512.hg.1	81.3832	85.9026	GPR3	1p36.1-p35	NM_005281	RefSeq	Homo sapiens G protein-coupled receptor 3 (GPR3), mRNA.	FALSE	Hs.66542	chr1	+	27392644	27395814	P46089	GO:0007189 // GO:0040020 // GO:0007165 // GO:0007186	adenylate cyclase-activating G-protein coupled receptor signaling pathway // regulation of meiotic nuclear division // signal transduction // G-protein coupled receptor signaling pathway	GO:0005887 // GO:0005886 // GO:0016020 // GO:0016021	integral component of plasma membrane // plasma membrane // membrane // integral component of membrane	GO:0004930 // GO:0005515 // GO:0004871 // GO:0004930	G-protein coupled receptor activity // protein binding // signal transducer activity // G-protein coupled receptor activity	GenMAPP	GPCRDB_Class_A_Rhodopsin-like
TC0100007514.hg.1	15.4159	16.1822	WASF2	---	hsa_circ_0000035	circbase	Memczak2013 ANTISENSE, coding, INTERNAL, intronic best transcript NM_006990	FALSE	---	chr1	+	27420914	27421242	---	---	---	---	---	---	---	---	---
TC0100007529.hg.1	456.663	358.936	FAM76A	1p35.3	NM_001143912	RefSeq	Homo sapiens family with sequence similarity 76, member A (FAM76A), transcript variant 1, mRNA.	FALSE	Hs.469359	chr1	+	27725979	27763122	Q8TAV0	---	---	---	---	---	---	---	---
TC0100007532.hg.1	996.331	862.793	STX12	1p35.3	NM_177424	RefSeq	Homo sapiens syntaxin 12 (STX12), mRNA.	FALSE	Hs.523855	chr1	+	27773183	27824452	Q86Y82	GO:0006886 // GO:0016192 // GO:0033344 // GO:0050821 // GO:0006810 // GO:0015031 // GO:0061025	intracellular protein transport // vesicle-mediated transport // cholesterol efflux // protein stabilization // transport // protein transport // membrane fusion	GO:0000139 // GO:0010008 // GO:0016021 // GO:0031083 // GO:0031201 // GO:0045121 // GO:0045335 // GO:0070062 // GO:0005768 // GO:0005794 // GO:0012505 // GO:0016020 // GO:0005622	Golgi membrane // endosome membrane // integral component of membrane // BLOC-1 complex // SNARE complex // membrane raft // phagocytic vesicle // extracellular exosome // endosome // Golgi apparatus // endomembrane system // membrane // intracellular	GO:0005484 // GO:0005515	SNAP receptor activity // protein binding	---	---
TC0100007538.hg.1	1320.53	1441.13	PPP1R8	1p35.3	NM_002713	RefSeq	Homo sapiens protein phosphatase 1, regulatory subunit 8 (PPP1R8), transcript variant 3, mRNA.	FALSE	Hs.533474	chr1	+	27830741	27851676	Q12972	GO:0006351 // GO:0006355 // GO:0006397 // GO:0006401 // GO:0008283 // GO:0008380 // GO:0043086 // GO:0043086 // GO:0090501 // GO:0050790 // GO:0090305	transcription, DNA-templated // regulation of transcription, DNA-templated // mRNA processing // RNA catabolic process // cell proliferation // RNA splicing // negative regulation of catalytic activity // negative regulation of catalytic activity // RNA phosphodiester bond hydrolysis // regulation of catalytic activity // nucleic acid phosphodiester bond hydrolysis	GO:0005634 // GO:0005654 // GO:0005681 // GO:0005737 // GO:0016607 // GO:0005634 // GO:0016607	nucleus // nucleoplasm // spliceosomal complex // cytoplasm // nuclear speck // nucleus // nuclear speck	GO:0003677 // GO:0003723 // GO:0004519 // GO:0004865 // GO:0005515 // GO:0008599 // GO:0008995 // GO:0003723 // GO:0004518 // GO:0004864 // GO:0016787	DNA binding // RNA binding // endonuclease activity // protein serine/threonine phosphatase inhibitor activity // protein binding // protein phosphatase type 1 regulator activity // ribonuclease E activity // RNA binding // nuclease activity // protein phosphatase inhibitor activity // hydrolase activity	---	---
TC0100007540.hg.1	38.7345	37.2142	THEMIS2	1p35.3	NM_001039477	RefSeq	Homo sapiens thymocyte selection associated family member 2 (THEMIS2), transcript variant 2, mRNA.	FALSE	Hs.10649	chr1	+	27872543	27886685	Q5TEJ8	GO:0006954 // GO:0007155 // GO:0050852 // GO:0002376	inflammatory response // cell adhesion // T cell receptor signaling pathway // immune system process	GO:0005634 // GO:0005737	nucleus // cytoplasm	GO:0005515	protein binding	---	---
TC0100007542.hg.1	70.3003	85.6597	SMPDL3B	1p35.3	NM_001009568	RefSeq	Homo sapiens sphingomyelin phosphodiesterase, acid-like 3B (SMPDL3B), transcript variant 2, mRNA.	FALSE	Hs.123659	chr1	+	27934955	27959157	Q92485	GO:0006685 // GO:0008150 // GO:0008152	sphingomyelin catabolic process // biological_process // metabolic process	GO:0005615 // GO:0070062 // GO:0005576 // GO:0005615	extracellular space // extracellular exosome // extracellular region // extracellular space	GO:0004767 // GO:0016798 // GO:0003674 // GO:0016787	sphingomyelin phosphodiesterase activity // hydrolase activity, acting on glycosyl bonds // molecular_function // hydrolase activity	---	---
TC0100007543.hg.1	913.334	801.016	XKR8	1p35.3	NM_018053	RefSeq	Homo sapiens XK, Kell blood group complex subunit-related family, member 8 (XKR8), mRNA.	FALSE	Hs.55024	chr1	+	27959462	27968096	Q9H6D3	GO:0043652 // GO:0070782 // GO:0006915	engulfment of apoptotic cell // phosphatidylserine exposure on apoptotic cell surface // apoptotic process	GO:0005886 // GO:0016021 // GO:0005886 // GO:0016020	plasma membrane // integral component of membrane // plasma membrane // membrane	---	---	---	---
TC0100007550.hg.1	5759.56	6346.44	ATPIF1	1p35.3	NM_016311	RefSeq	Homo sapiens ATPase inhibitory factor 1 (ATPIF1), transcript variant 1, mRNA.	FALSE	Hs.744914	chr1	+	28236091	28246906	Q9UII2	GO:0001525 // GO:0001937 // GO:0006091 // GO:0006783 // GO:0009396 // GO:0030218 // GO:0032780 // GO:0035999 // GO:0051260 // GO:0051289 // GO:0051346 // GO:0051346 // GO:0051882 // GO:0072593 // GO:0098779 // GO:1901030 // GO:1903052 // GO:1903214 // GO:1903578 // GO:0009396 // GO:0032780 // GO:0035999	angiogenesis // negative regulation of endothelial cell proliferation // generation of precursor metabolites and energy // heme biosynthetic process // folic acid-containing compound biosynthetic process // erythrocyte differentiation // negative regulation of ATPase activity // tetrahydrofolate interconversion // protein homooligomerization // protein homotetramerization // negative regulation o…	GO:0005739 // GO:0005739 // GO:0005753 // GO:0009986 // GO:0005739 // GO:0005739	mitochondrion // mitochondrion // mitochondrial proton-transporting ATP synthase complex // cell surface // mitochondrion // mitochondrion	GO:0004857 // GO:0005516 // GO:0030272 // GO:0042030 // GO:0042030 // GO:0042030 // GO:0042803 // GO:0042803 // GO:0043532 // GO:0051117 // GO:0051117 // GO:0030272 // GO:0042030	enzyme inhibitor activity // calmodulin binding // 5-formyltetrahydrofolate cyclo-ligase activity // ATPase inhibitor activity // ATPase inhibitor activity // ATPase inhibitor activity // protein homodimerization activity // protein homodimerization activity // angiostatin binding // ATPase binding // ATPase binding // 5-formyltetrahydrofolate cyclo-ligase activity // ATPase inhibitor activity	GenMAPP	Electron_Transport_Chain
TC0100007552.hg.1	366.036	470.334	SESN2	1p35.3	NM_031459	RefSeq	Homo sapiens sestrin 2 (SESN2), mRNA.	FALSE	Hs.469543	chr1	+	28259452	28282491	P58004	GO:0006367 // GO:0006635 // GO:0006914 // GO:0009749 // GO:0010467 // GO:0032042 // GO:0032868 // GO:0043491 // GO:0046323 // GO:0070328 // GO:0090526 // GO:1901031 // GO:2000479 // GO:0001932 // GO:0007005 // GO:0042593	transcription initiation from RNA polymerase II promoter // fatty acid beta-oxidation // autophagy // response to glucose // gene expression // mitochondrial DNA metabolic process // response to insulin // protein kinase B signaling // glucose import // triglyceride homeostasis // regulation of gluconeogenesis involved in cellular glucose homeostasis // regulation of response to reactive oxygen s…	GO:0005634 // GO:0005737 // GO:0005739 // GO:0005829	nucleus // cytoplasm // mitochondrion // cytosol	GO:0005515	protein binding	---	---
TC0100007555.hg.1	483.656	463.972	MED18	1p35.3	NM_001127350	RefSeq	Homo sapiens mediator complex subunit 18 (MED18), transcript variant 2, mRNA.	FALSE	Hs.479911	chr1	+	28329002	28335967	Q9BUE0	GO:0006357 // GO:0006369 // GO:0006351 // GO:0006355 // GO:0006357 // GO:0006357 // GO:0006369	regulation of transcription from RNA polymerase II promoter // termination of RNA polymerase II transcription // transcription, DNA-templated // regulation of transcription, DNA-templated // regulation of transcription from RNA polymerase II promoter // regulation of transcription from RNA polymerase II promoter // termination of RNA polymerase II transcription	GO:0016592 // GO:0070847 // GO:0005634 // GO:0016592 // GO:0070847	mediator complex // core mediator complex // nucleus // mediator complex // core mediator complex	GO:0001104 // GO:0005515 // GO:0001104 // GO:0001104	RNA polymerase II transcription cofactor activity // protein binding // RNA polymerase II transcription cofactor activity // RNA polymerase II transcription cofactor activity	---	---
TC0100007556.hg.1	1137.61	989.46	PHACTR4	1p35.3	NM_001048183	RefSeq	Homo sapiens phosphatase and actin regulator 4 (PHACTR4), transcript variant 1, mRNA.	FALSE	Hs.225641	chr1	+	28369582	28502771	Q8IZ21	GO:0001755 // GO:0001843 // GO:0007266 // GO:0030036 // GO:0043085 // GO:0048484 // GO:0051726 // GO:0061386 // GO:2001045 // GO:0001755 // GO:0001843 // GO:0007266 // GO:0007275 // GO:0007399 // GO:0030036 // GO:0043085 // GO:0048484 // GO:0051726 // GO:0061386 // GO:2001045	neural crest cell migration // neural tube closure // Rho protein signal transduction // actin cytoskeleton organization // positive regulation of catalytic activity // enteric nervous system development // regulation of cell cycle // closure of optic fissure // negative regulation of integrin-mediated signaling pathway // neural crest cell migration // neural tube closure // Rho protein signal t…	GO:0005737 // GO:0030027 // GO:0005622 // GO:0030027 // GO:0042995	cytoplasm // lamellipodium // intracellular // lamellipodium // cell projection	GO:0003779 // GO:0008157 // GO:0071862 // GO:0003779 // GO:0008157 // GO:0008599 // GO:0071862	actin binding // protein phosphatase 1 binding // protein phosphatase type 1 activator activity // actin binding // protein phosphatase 1 binding // protein phosphatase type 1 regulator activity // protein phosphatase type 1 activator activity	---	---
TC0100007559.hg.1	451.854	450.214	RCC1	1p36.1	NM_001048194	RefSeq	Homo sapiens regulator of chromosome condensation 1 (RCC1), transcript variant 1, mRNA.	FALSE	Hs.469723	chr1	+	28505942	28539300	P18754	GO:0000082 // GO:0007052 // GO:0007059 // GO:0007067 // GO:0007088 // GO:0016032 // GO:0043547 // GO:0043547 // GO:0051225 // GO:0051301 // GO:0007049	G1/S transition of mitotic cell cycle // mitotic spindle organization // chromosome segregation // mitotic nuclear division // regulation of mitotic nuclear division // viral process // positive regulation of GTPase activity // positive regulation of GTPase activity // spindle assembly // cell division // cell cycle	GO:0000790 // GO:0000794 // GO:0005634 // GO:0005654 // GO:0005654 // GO:0005737 // GO:0031965 // GO:0005634 // GO:0005737	nuclear chromatin // condensed nuclear chromosome // nucleus // nucleoplasm // nucleoplasm // cytoplasm // nuclear membrane // nucleus // cytoplasm	GO:0003682 // GO:0005087 // GO:0005515 // GO:0031492 // GO:0042393 // GO:0003677 // GO:0005085	chromatin binding // Ran guanyl-nucleotide exchange factor activity // protein binding // nucleosomal DNA binding // histone binding // DNA binding // guanyl-nucleotide exchange factor activity	---	---
TC0100007562.hg.1	412.262	524.475	TRNAU1AP	1p35.3	NM_017846	RefSeq	Homo sapiens tRNA selenocysteine 1 associated protein 1 (TRNAU1AP), transcript variant 1, mRNA.	FALSE	Hs.533626	chr1	+	28553017	28578545	Q9NX07	GO:0001514 // GO:0001514 // GO:0006412	selenocysteine incorporation // selenocysteine incorporation // translation	GO:0005634 // GO:0005737 // GO:0005634	nucleus // cytoplasm // nucleus	GO:0000166 // GO:0044822 // GO:0003676 // GO:0003723	nucleotide binding // poly(A) RNA binding // nucleic acid binding // RNA binding	---	---
TC0100007564.hg.1	77.1505	76.3445	RAB42	1p35.3	NM_001193532	RefSeq	Homo sapiens RAB42, member RAS oncogene family (RAB42), transcript variant 1, mRNA.	FALSE	Hs.652321	chr1	+	28592200	28595443	Q8N4Z0	GO:0006886 // GO:0032482 // GO:0006886 // GO:0007264 // GO:0032482	intracellular protein transport // Rab protein signal transduction // intracellular protein transport // small GTPase mediated signal transduction // Rab protein signal transduction	GO:0005794 // GO:0016020 // GO:0005794	Golgi apparatus // membrane // Golgi apparatus	GO:0003924 // GO:0005525 // GO:0000166 // GO:0003924	GTPase activity // GTP binding // nucleotide binding // GTPase activity	---	---
TC0100007569.hg.1	3100.91	2819.86	GMEB1	1p35.3	NM_006582	RefSeq	Homo sapiens glucocorticoid modulatory element binding protein 1 (GMEB1), transcript variant 1, mRNA.	FALSE	Hs.632373	chr1	+	28668728	28719353	Q9Y692	GO:0006357 // GO:0006366 // GO:0045944 // GO:0006351 // GO:0006355 // GO:0006357 // GO:1903506	regulation of transcription from RNA polymerase II promoter // transcription from RNA polymerase II promoter // positive regulation of transcription from RNA polymerase II promoter // transcription, DNA-templated // regulation of transcription, DNA-templated // regulation of transcription from RNA polymerase II promoter // regulation of nucleic acid-templated transcription	GO:0005634 // GO:0005654 // GO:0005737 // GO:0005634	nucleus // nucleoplasm // cytoplasm // nucleus	GO:0000978 // GO:0001077 // GO:0003713 // GO:0046872 // GO:0000978 // GO:0000978 // GO:0003677 // GO:0003700 // GO:0003713	RNA polymerase II core promoter proximal region sequence-specific DNA binding // transcriptional activator activity, RNA polymerase II core promoter proximal region sequence-specific binding // transcription coactivator activity // metal ion binding // RNA polymerase II core promoter proximal region sequence-specific DNA binding // RNA polymerase II core promoter proximal region sequence-specific…	---	---
TC0100007570.hg.1	4170.27	4777.74	YTHDF2	1p35	NM_001172828	RefSeq	Homo sapiens YTH N(6)-methyladenosine RNA binding protein 2 (YTHDF2), transcript variant 3, mRNA.	FALSE	Hs.532286	chr1	+	28736621	28769775	Q9Y5A9	GO:0006959 // GO:0043488	humoral immune response // regulation of mRNA stability	GO:0000932 // GO:0005737 // GO:0000932 // GO:0005737	cytoplasmic mRNA processing body // cytoplasm // cytoplasmic mRNA processing body // cytoplasm	GO:0044822 // GO:1990247 // GO:0003723	poly(A) RNA binding // N6-methyladenosine-containing RNA binding // RNA binding	---	---
TC0100007573.hg.1	20.214	36.8959	OPRD1	1p36.1-p34.3	NM_000911	RefSeq	Homo sapiens opioid receptor, delta 1 (OPRD1), mRNA.	FALSE	Hs.372	chr1	+	28812142	28871712	P41143	GO:0000060 // GO:0006955 // GO:0007186 // GO:0007187 // GO:0007193 // GO:0007200 // GO:0007218 // GO:0007268 // GO:0008344 // GO:0010629 // GO:0032460 // GO:0032793 // GO:0033138 // GO:0038003 // GO:0042755 // GO:0051881 // GO:0051924 // GO:0051930 // GO:0071363 // GO:0071456 // GO:0097237 // GO:0007165 // GO:0007186 // GO:0007200 // GO:0007218 // GO:0007218 // GO:0007268 // GO:0038003	protein import into nucleus, translocation // immune response // G-protein coupled receptor signaling pathway // G-protein coupled receptor signaling pathway, coupled to cyclic nucleotide second messenger // adenylate cyclase-inhibiting G-protein coupled receptor signaling pathway // phospholipase C-activating G-protein coupled receptor signaling pathway // neuropeptide signaling pathway // synap…	GO:0005737 // GO:0005886 // GO:0005887 // GO:0031226 // GO:0031982 // GO:0032590 // GO:0043005 // GO:0043679 // GO:0045121 // GO:0045211 // GO:0005886 // GO:0016020 // GO:0016021 // GO:0043005	cytoplasm // plasma membrane // integral component of plasma membrane // intrinsic component of plasma membrane // vesicle // dendrite membrane // neuron projection // axon terminus // membrane raft // postsynaptic membrane // plasma membrane // membrane // integral component of membrane // neuron projection	GO:0004985 // GO:0005515 // GO:0038046 // GO:0042923 // GO:0004871 // GO:0004930 // GO:0004985 // GO:0038046 // GO:0042923	opioid receptor activity // protein binding // enkephalin receptor activity // neuropeptide binding // signal transducer activity // G-protein coupled receptor activity // opioid receptor activity // enkephalin receptor activity // neuropeptide binding	GenMAPP // GenMAPP	GPCRDB_Class_A_Rhodopsin-like // Peptide_GPCRs
TC0100007574.hg.1	2605.32	3202.74	EPB41	1p33-p32	NM_001166005	RefSeq	Homo sapiens erythrocyte membrane protein band 4.1 (EPB41), transcript variant 1, mRNA.	FALSE	Hs.175437	chr1	+	28887091	29120446	P11171	GO:0008015 // GO:0030036 // GO:0030866 // GO:0032092	blood circulation // actin cytoskeleton organization // cortical actin cytoskeleton organization // positive regulation of protein binding	GO:0005634 // GO:0005737 // GO:0005886 // GO:0008091 // GO:0014731 // GO:0019898 // GO:0030054 // GO:0030863 // GO:0043234 // GO:0005737 // GO:0005856 // GO:0005886 // GO:0005938 // GO:0016020	nucleus // cytoplasm // plasma membrane // spectrin // spectrin-associated cytoskeleton // extrinsic component of membrane // cell junction // cortical cytoskeleton // protein complex // cytoplasm // cytoskeleton // plasma membrane // cell cortex // membrane	GO:0003779 // GO:0005200 // GO:0005515 // GO:0005516 // GO:0005545 // GO:0030507 // GO:0005198 // GO:0008092	actin binding // structural constituent of cytoskeleton // protein binding // calmodulin binding // 1-phosphatidylinositol binding // spectrin binding // structural molecule activity // cytoskeletal protein binding	---	---
TC0100007575.hg.1	331.26	294.157	EPB41	---	hsa_circ_0000040	circbase	Memczak2013 ALT_ACCEPTOR, ALT_DONOR, coding, INTERNAL, intronic best transcript NM_001166007	FALSE	---	chr1	+	28915000	28915140	---	---	---	---	---	---	---	---	---
TC0100007584.hg.1	22.0497	25.1755	PTPRU	1p35.3	NM_001195001	RefSeq	Homo sapiens protein tyrosine phosphatase, receptor type, U (PTPRU), transcript variant 4, mRNA.	FALSE	Hs.19718	chr1	+	29236516	29326813	Q92729	GO:0006470 // GO:0007155 // GO:0007185 // GO:0008285 // GO:0016337 // GO:0030154 // GO:0030336 // GO:0031100 // GO:0034109 // GO:0034394 // GO:0035335 // GO:0035335 // GO:0035335 // GO:0035335 // GO:0051384 // GO:0060070 // GO:0006470 // GO:0007155 // GO:0016311	protein dephosphorylation // cell adhesion // transmembrane receptor protein tyrosine phosphatase signaling pathway // negative regulation of cell proliferation // single organismal cell-cell adhesion // cell differentiation // negative regulation of cell migration // organ regeneration // homotypic cell-cell adhesion // protein localization to cell surface // peptidyl-tyrosine dephosphorylation …	GO:0005886 // GO:0005887 // GO:0005911 // GO:0005886 // GO:0016020 // GO:0016021 // GO:0030054	plasma membrane // integral component of plasma membrane // cell-cell junction // plasma membrane // membrane // integral component of membrane // cell junction	GO:0004725 // GO:0004725 // GO:0005001 // GO:0005515 // GO:0008013 // GO:0004721 // GO:0004725 // GO:0016787 // GO:0016791	protein tyrosine phosphatase activity // protein tyrosine phosphatase activity // transmembrane receptor protein tyrosine phosphatase activity // protein binding // beta-catenin binding // phosphoprotein phosphatase activity // protein tyrosine phosphatase activity // hydrolase activity // phosphatase activity	---	---
TC0100007634.hg.1	1725.05	2368.78	ZCCHC17	1p35.2	NM_001282566	RefSeq	Homo sapiens zinc finger, CCHC domain containing 17 (ZCCHC17), transcript variant 1, mRNA.	FALSE	Hs.524094	chr1	+	31296982	31364953	Q9NP64	GO:0002230 // GO:0098779 // GO:0098792	positive regulation of defense response to virus by host // mitophagy in response to mitochondrial depolarization // xenophagy	GO:0005634 // GO:0005730 // GO:0030529 // GO:0043231 // GO:0045111 // GO:0005634 // GO:0022625	nucleus // nucleolus // ribonucleoprotein complex // intracellular membrane-bounded organelle // intermediate filament cytoskeleton // nucleus // cytosolic large ribosomal subunit	GO:0005515 // GO:0008270 // GO:0044822 // GO:0003676 // GO:0046872	protein binding // zinc ion binding // poly(A) RNA binding // nucleic acid binding // metal ion binding	---	---
TC0100007638.hg.1	17.8543	16.094	SERINC2	1p35.1	NM_001199037	RefSeq	Homo sapiens serine incorporator 2 (SERINC2), transcript variant 3, mRNA.	FALSE	Hs.270655	chr1	+	31409565	31434680	Q96SA4	GO:0006658 // GO:0006665 // GO:0015825 // GO:0051347 // GO:0015825 // GO:0015825 // GO:0006658 // GO:1904219 // GO:1904222	phosphatidylserine metabolic process // sphingolipid metabolic process // L-serine transport // positive regulation of transferase activity // L-serine transport // L-serine transport // phosphatidylserine metabolic process // positive regulation of CDP-diacylglycerol-serine O-phosphatidyltransferase activity // positive regulation of serine C-palmitoyltransferase activity	GO:0016021 // GO:0070062 // GO:0016020 // GO:0016021 // GO:0016021	integral component of membrane // extracellular exosome // membrane // integral component of membrane // integral component of membrane	GO:0015194 // GO:0015194 // GO:0015194	L-serine transmembrane transporter activity // L-serine transmembrane transporter activity // L-serine transmembrane transporter activity	---	---
TC0100007641.hg.1	74.2882	66.2261	LINC01225	1p35.2	NR_034112	RefSeq	Homo sapiens long intergenic non-protein coding RNA 1225 (LINC01225), non-coding RNA.	FALSE	Hs.729905	chr1	+	31500085	31540885	---	---	---	---	---	---	---	---	---
TC0100007645.hg.1	12.5044	8.73822	TINAGL1	1p35.2	NM_001204414	RefSeq	Homo sapiens tubulointerstitial nephritis antigen-like 1 (TINAGL1), transcript variant 2, mRNA.	FALSE	Hs.199368	chr1	+	31576485	31587686	Q9GZM7	GO:0006898 // GO:0006955 // GO:0007155 // GO:0016197 // GO:0051603 // GO:0006508 // GO:0007155 // GO:0051603	receptor-mediated endocytosis // immune response // cell adhesion // endosomal transport // proteolysis involved in cellular protein catabolic process // proteolysis // cell adhesion // proteolysis involved in cellular protein catabolic process	GO:0005576 // GO:0005615 // GO:0005615 // GO:0005764 // GO:0031012 // GO:0070062 // GO:0005576 // GO:0005615 // GO:0005737 // GO:0005764	extracellular region // extracellular space // extracellular space // lysosome // extracellular matrix // extracellular exosome // extracellular region // extracellular space // cytoplasm // lysosome	GO:0004197 // GO:0005044 // GO:0005201 // GO:0005515 // GO:0030247 // GO:0043236 // GO:0004197 // GO:0008234	cysteine-type endopeptidase activity // scavenger receptor activity // extracellular matrix structural constituent // protein binding // polysaccharide binding // laminin binding // cysteine-type endopeptidase activity // cysteine-type peptidase activity	---	---
TC0100007646.hg.1	16.2685	15.1711	HCRTR1	1p33	NM_001525	RefSeq	Homo sapiens hypocretin (orexin) receptor 1 (HCRTR1), mRNA.	FALSE	Hs.388226	chr1	+	31617686	31632518	O43613	GO:0007218 // GO:0007268 // GO:0007631 // GO:0032870 // GO:0045187 // GO:1901652 // GO:0007165 // GO:0007186 // GO:0007218 // GO:0007631 // GO:0032870 // GO:0045187 // GO:1901652	neuropeptide signaling pathway // synaptic transmission // feeding behavior // cellular response to hormone stimulus // regulation of circadian sleep/wake cycle, sleep // response to peptide // signal transduction // G-protein coupled receptor signaling pathway // neuropeptide signaling pathway // feeding behavior // cellular response to hormone stimulus // regulation of circadian sleep/wake cycl…	GO:0005886 // GO:0005887 // GO:0005886 // GO:0016020 // GO:0016021	plasma membrane // integral component of plasma membrane // plasma membrane // membrane // integral component of membrane	GO:0004930 // GO:0008188 // GO:0016499 // GO:0017046 // GO:0042277 // GO:0004871 // GO:0004930 // GO:0008188 // GO:0016499 // GO:0016499 // GO:0042277	G-protein coupled receptor activity // neuropeptide receptor activity // orexin receptor activity // peptide hormone binding // peptide binding // signal transducer activity // G-protein coupled receptor activity // neuropeptide receptor activity // orexin receptor activity // orexin receptor activity // peptide binding	GenMAPP	GPCRDB_Class_A_Rhodopsin-like
TC0100007659.hg.1	5850.4	6292.41	KHDRBS1	1p32	NM_001271878	RefSeq	Homo sapiens KH domain containing, RNA binding, signal transduction associated 1 (KHDRBS1), transcript variant 2, mRNA.	FALSE	Hs.445893	chr1	+	32013694	32060859	Q07666	GO:0000086 // GO:0006351 // GO:0006397 // GO:0007050 // GO:0007165 // GO:0007166 // GO:0008283 // GO:0009967 // GO:0009967 // GO:0031647 // GO:0045892 // GO:0045948 // GO:0046831 // GO:0046833 // GO:0006355 // GO:0007049 // GO:0007166 // GO:0045892 // GO:0046831	G2/M transition of mitotic cell cycle // transcription, DNA-templated // mRNA processing // cell cycle arrest // signal transduction // cell surface receptor signaling pathway // cell proliferation // positive regulation of signal transduction // positive regulation of signal transduction // regulation of protein stability // negative regulation of transcription, DNA-templated // positive regulat…	GO:0005634 // GO:0005654 // GO:0005737 // GO:0016020 // GO:0070618 // GO:0005634 // GO:0016020	nucleus // nucleoplasm // cytoplasm // membrane // Grb2-Sos complex // nucleus // membrane	GO:0003677 // GO:0003723 // GO:0005070 // GO:0005515 // GO:0008143 // GO:0008266 // GO:0017124 // GO:0032403 // GO:0042802 // GO:0044822 // GO:0003676 // GO:0003723 // GO:0005070	DNA binding // RNA binding // SH3/SH2 adaptor activity // protein binding // poly(A) binding // poly(U) RNA binding // SH3 domain binding // protein complex binding // identical protein binding // poly(A) RNA binding // nucleic acid binding // RNA binding // SH3/SH2 adaptor activity	---	---
TC0100007660.hg.1	130.875	139.335	TMEM39B	1p35.1	NM_018056	RefSeq	Homo sapiens transmembrane protein 39B (TMEM39B), mRNA.	FALSE	Hs.25544	chr1	+	32072031	32102866	Q9GZU3	GO:0002230 // GO:0098779 // GO:0098792	positive regulation of defense response to virus by host // mitophagy in response to mitochondrial depolarization // xenophagy	GO:0016021 // GO:0016020	integral component of membrane // membrane	---	---	---	---
TC0100007662.hg.1	6864.42	6428.28	KPNA6	1p35.1	NM_012316	RefSeq	Homo sapiens karyopherin alpha 6 (importin alpha 7) (KPNA6), mRNA.	FALSE	Hs.470588 // Hs.711019	chr1	+	32108038	32176568	O60684	GO:0006607 // GO:0045944 // GO:0060135 // GO:0006606 // GO:0006810 // GO:0015031	NLS-bearing protein import into nucleus // positive regulation of transcription from RNA polymerase II promoter // maternal process involved in female pregnancy // protein import into nucleus // transport // protein transport	GO:0005643 // GO:0005654 // GO:0005829 // GO:0016020 // GO:0005634 // GO:0005643 // GO:0005654 // GO:0005737 // GO:0005829	nuclear pore // nucleoplasm // cytosol // membrane // nucleus // nuclear pore // nucleoplasm // cytoplasm // cytosol	GO:0005515 // GO:0008139 // GO:0008565 // GO:0008139 // GO:0008565 // GO:0008565	protein binding // nuclear localization sequence binding // protein transporter activity // nuclear localization sequence binding // protein transporter activity // protein transporter activity	---	---
TC0100007666.hg.1	170.617	132.017	KPNA6	---	hsa_circ_0002834	circbase	Jeck2013 ALT_ACCEPTOR, ALT_DONOR, coding, INTERNAL, intronic best transcript NM_012316	FALSE	---	chr1	+	32139179	32139864	---	---	---	---	---	---	---	---	---
TC0100007668.hg.1	2137.01	2114.29	TXLNA	1p35.1	NM_175852	RefSeq	Homo sapiens taxilin alpha (TXLNA), mRNA.	FALSE	Hs.17987	chr1	+	32179686	32198285	P40222	GO:0006887 // GO:0008283 // GO:0042113 // GO:0098779	exocytosis // cell proliferation // B cell activation // mitophagy in response to mitochondrial depolarization	GO:0005576 // GO:0005737 // GO:0016020	extracellular region // cytoplasm // membrane	GO:0005125 // GO:0005515 // GO:0019905 // GO:0030372	cytokine activity // protein binding // syntaxin binding // high molecular weight B cell growth factor receptor binding	---	---
TC0100007669.hg.1	166.985	208.283	CCDC28B	1p36.11-p34.2	NM_001301011	RefSeq	Homo sapiens coiled-coil domain containing 28B (CCDC28B), transcript variant 1, mRNA.	FALSE	Hs.534482	chr1	+	32200386	32205390	Q9BUN5	GO:0042384 // GO:0030030	cilium assembly // cell projection organization	GO:0005737 // GO:0005813 // GO:0005815 // GO:0005856	cytoplasm // centrosome // microtubule organizing center // cytoskeleton	GO:0005515	protein binding	---	---
TC0100007670.hg.1	93.1254	100.309	IQCC	1p36.11-p34.2	NM_001160042	RefSeq	Homo sapiens IQ motif containing C (IQCC), transcript variant 1, mRNA.	FALSE	Hs.274356	chr1	+	32205635	32208687	Q4KMZ1	---	---	---	---	---	---	---	---
TC0100007671.hg.1	41.3467	36.7733	DCDC2B	1p35.1	NM_001099434	RefSeq	Homo sapiens doublecortin domain containing 2B (DCDC2B), mRNA.	FALSE	Hs.424588	chr1	+	32209094	32216196	A2VCK2	GO:0035556	intracellular signal transduction	GO:0005622	intracellular	GO:0005515	protein binding	---	---
TC0100007672.hg.1	5506.83	5800.32	EIF3I	1p34.1	NM_003757	RefSeq	Homo sapiens eukaryotic translation initiation factor 3, subunit I (EIF3I), mRNA.	FALSE	Hs.530096	chr1	+	32221584	32231604	Q13347	GO:0001731 // GO:0006412 // GO:0006413 // GO:0006413 // GO:0006413 // GO:0006446 // GO:0010467 // GO:0044267 // GO:0006412 // GO:0006413	formation of translation preinitiation complex // translation // translational initiation // translational initiation // translational initiation // regulation of translational initiation // gene expression // cellular protein metabolic process // translation // translational initiation	GO:0005829 // GO:0005852 // GO:0016282 // GO:0033290 // GO:0070062 // GO:0071541 // GO:0005737 // GO:0005852	cytosol // eukaryotic translation initiation factor 3 complex // eukaryotic 43S preinitiation complex // eukaryotic 48S preinitiation complex // extracellular exosome // eukaryotic translation initiation factor 3 complex, eIF3m // cytoplasm // eukaryotic translation initiation factor 3 complex	GO:0003743 // GO:0003743 // GO:0005515 // GO:0003743	translation initiation factor activity // translation initiation factor activity // protein binding // translation initiation factor activity	GenMAPP	Translation_Factors
TC0100007675.hg.1	30.3655	24.3353	FAM167B	1p35.1	NM_032648	RefSeq	Homo sapiens family with sequence similarity 167, member B (FAM167B), mRNA.	FALSE	Hs.18449	chr1	+	32247217	32248860	Q9BTA0	---	---	---	---	---	---	---	---
TC0100007676.hg.1	33087.5	38445.6	LCK	1p34.3	NM_001042771	RefSeq	Homo sapiens LCK proto-oncogene, Src family tyrosine kinase (LCK), transcript variant 1, mRNA.	FALSE	Hs.470627	chr1	+	32251239	32286167	P06239	GO:0006468 // GO:0006470 // GO:0006470 // GO:0006882 // GO:0006882 // GO:0006919 // GO:0006919 // GO:0007169 // GO:0007173 // GO:0007568 // GO:0007596 // GO:0008543 // GO:0009612 // GO:0010043 // GO:0010628 // GO:0016032 // GO:0030097 // GO:0030168 // GO:0030217 // GO:0030217 // GO:0031295 // GO:0038083 // GO:0038095 // GO:0042127 // GO:0042493 // GO:0042493 // GO:0042523 // GO:0042542 // GO:0045…	protein phosphorylation // protein dephosphorylation // protein dephosphorylation // cellular zinc ion homeostasis // cellular zinc ion homeostasis // activation of cysteine-type endopeptidase activity involved in apoptotic process // activation of cysteine-type endopeptidase activity involved in apoptotic process // transmembrane receptor protein tyrosine kinase signaling pathway // epidermal gr…	GO:0000242 // GO:0000242 // GO:0001772 // GO:0005829 // GO:0005886 // GO:0005886 // GO:0005911 // GO:0030139 // GO:0031234 // GO:0045121 // GO:0045121 // GO:0070062 // GO:0005737 // GO:0005886 // GO:0016020 // GO:0031234 // GO:0045121	pericentriolar material // pericentriolar material // immunological synapse // cytosol // plasma membrane // plasma membrane // cell-cell junction // endocytic vesicle // extrinsic component of cytoplasmic side of plasma membrane // membrane raft // membrane raft // extracellular exosome // cytoplasm // plasma membrane // membrane // extrinsic component of cytoplasmic side of plasma membrane // m…	GO:0001948 // GO:0003823 // GO:0004713 // GO:0004713 // GO:0004713 // GO:0004713 // GO:0004715 // GO:0004722 // GO:0004722 // GO:0005515 // GO:0005524 // GO:0008022 // GO:0019901 // GO:0019903 // GO:0032403 // GO:0042169 // GO:0042169 // GO:0042609 // GO:0042610 // GO:0042802 // GO:0043548 // GO:0051117 // GO:0000166 // GO:0004672 // GO:0004713 // GO:0004713 // GO:0004715 // GO:0004715 // GO:0016…	glycoprotein binding // antigen binding // protein tyrosine kinase activity // protein tyrosine kinase activity // protein tyrosine kinase activity // protein tyrosine kinase activity // non-membrane spanning protein tyrosine kinase activity // protein serine/threonine phosphatase activity // protein serine/threonine phosphatase activity // protein binding // ATP binding // protein C-terminus bin…	GenMAPP	Inflammatory_Response_Pathway
TC0100007678.hg.1	6562.71	6992.81	HDAC1	1p34	NM_004964	RefSeq	Homo sapiens histone deacetylase 1 (HDAC1), mRNA.	FALSE	Hs.88556	chr1	+	32292086	32333635	Q13547	GO:0000122 // GO:0000122 // GO:0000122 // GO:0000278 // GO:0006325 // GO:0006338 // GO:0006351 // GO:0006367 // GO:0006476 // GO:0007179 // GO:0007219 // GO:0007596 // GO:0008284 // GO:0009913 // GO:0010467 // GO:0010629 // GO:0010832 // GO:0010870 // GO:0016032 // GO:0016568 // GO:0016575 // GO:0032922 // GO:0040029 // GO:0042475 // GO:0042733 // GO:0043044 // GO:0043066 // GO:0043922 // GO:0045…	negative regulation of transcription from RNA polymerase II promoter // negative regulation of transcription from RNA polymerase II promoter // negative regulation of transcription from RNA polymerase II promoter // mitotic cell cycle // chromatin organization // chromatin remodeling // transcription, DNA-templated // transcription initiation from RNA polymerase II promoter // protein deacetylati…	GO:0000118 // GO:0000785 // GO:0000790 // GO:0005634 // GO:0005654 // GO:0005654 // GO:0005737 // GO:0005829 // GO:0016580 // GO:0016581 // GO:0043234 // GO:0005634	histone deacetylase complex // chromatin // nuclear chromatin // nucleus // nucleoplasm // nucleoplasm // cytoplasm // cytosol // Sin3 complex // NuRD complex // protein complex // nucleus	GO:0000976 // GO:0000978 // GO:0000980 // GO:0001047 // GO:0001103 // GO:0001106 // GO:0003700 // GO:0004407 // GO:0004407 // GO:0004407 // GO:0005515 // GO:0008134 // GO:0008134 // GO:0019213 // GO:0019899 // GO:0031492 // GO:0032041 // GO:0033558 // GO:0033558 // GO:0033613 // GO:0042826 // GO:0044212 // GO:0047485 // GO:0051059 // GO:0070491 // GO:0004407 // GO:0016787	transcription regulatory region sequence-specific DNA binding // RNA polymerase II core promoter proximal region sequence-specific DNA binding // RNA polymerase II distal enhancer sequence-specific DNA binding // core promoter binding // RNA polymerase II repressing transcription factor binding // RNA polymerase II transcription corepressor activity // transcription factor activity, sequence-spec…	GenMAPP	Cell_cycle_KEGG
TC0100007690.hg.1	6465.94	5876.67	RBBP4	1p35.1	NM_001135255	RefSeq	Homo sapiens retinoblastoma binding protein 4 (RBBP4), transcript variant 2, mRNA.	FALSE	Hs.16003	chr1	+	32651142	32686211	Q09028	GO:0000086 // GO:0000278 // GO:0006260 // GO:0006325 // GO:0006334 // GO:0006335 // GO:0006336 // GO:0006338 // GO:0006351 // GO:0006355 // GO:0008285 // GO:0010467 // GO:0031497 // GO:0034080 // GO:0040029 // GO:0043044 // GO:0045814 // GO:0051726 // GO:0007049 // GO:0016568	G2/M transition of mitotic cell cycle // mitotic cell cycle // DNA replication // chromatin organization // nucleosome assembly // DNA replication-dependent nucleosome assembly // DNA replication-independent nucleosome assembly // chromatin remodeling // transcription, DNA-templated // regulation of transcription, DNA-templated // negative regulation of cell proliferation // gene expression // ch…	GO:0000790 // GO:0005634 // GO:0005654 // GO:0005654 // GO:0016580 // GO:0016581 // GO:0016581 // GO:0016589 // GO:0033186 // GO:0035098 // GO:0043234 // GO:0005634	nuclear chromatin // nucleus // nucleoplasm // nucleoplasm // Sin3 complex // NuRD complex // NuRD complex // NURF complex // CAF-1 complex // ESC/E(Z) complex // protein complex // nucleus	GO:0000978 // GO:0000980 // GO:0005515 // GO:0008094 // GO:0031492 // GO:0042393 // GO:0042826	RNA polymerase II core promoter proximal region sequence-specific DNA binding // RNA polymerase II distal enhancer sequence-specific DNA binding // protein binding // DNA-dependent ATPase activity // nucleosomal DNA binding // histone binding // histone deacetylase binding	---	---
TC0100007691.hg.1	21.3759	14.3724	KIAA1522	1p35.1	NM_001198972	RefSeq	Homo sapiens KIAA1522 (KIAA1522), transcript variant 2, mRNA.	FALSE	Hs.591502	chr1	+	32741885	32774970	Q9P206	---	---	---	---	---	---	---	---
TC0100007693.hg.1	3023.56	2642.51	S100PBP	1p35.1	NM_001256121	RefSeq	Homo sapiens S100P binding protein (S100PBP), transcript variant 3, mRNA.	FALSE	Hs.440880	chr1	+	32816767	32858879	Q96BU1	---	---	GO:0005634 // GO:0005634	nucleus // nucleus	GO:0048306 // GO:0048306	calcium-dependent protein binding // calcium-dependent protein binding	---	---
TC0100007694.hg.1	120.992	134.913	HPCA	1p35-p34.2	NM_002143	RefSeq	Homo sapiens hippocalcin (HPCA), mRNA.	FALSE	Hs.632391	chr1	+	32885994	32898441	P84074	GO:0007420 // GO:0019722 // GO:0031283 // GO:0031584 // GO:0045762 // GO:0048839 // GO:0060041 // GO:0071257 // GO:0090314 // GO:1901986 // GO:1902065 // GO:1904009 // GO:1904010 // GO:0010518 // GO:0014070	brain development // calcium-mediated signaling // negative regulation of guanylate cyclase activity // activation of phospholipase D activity // positive regulation of adenylate cyclase activity // inner ear development // retina development in camera-type eye // cellular response to electrical stimulus // positive regulation of protein targeting to membrane // response to ketamine // response t…	GO:0030424 // GO:0032590 // GO:0032809 // GO:0032839 // GO:0043204 // GO:0044327	axon // dendrite membrane // neuronal cell body membrane // dendrite cytoplasm // perikaryon // dendritic spine head	GO:0003779 // GO:0005509 // GO:0019900 // GO:0005509 // GO:0046872	actin binding // calcium ion binding // kinase binding // calcium ion binding // metal ion binding	---	---
TC0100007698.hg.1	49.0444	46.476	RNF19B	---	hsa_circ_0000049	circbase	Memczak2013 ANTISENSE, CDS, coding, INTERNAL best transcript NM_153341	FALSE	---	chr1	+	32964098	32964238	---	---	---	---	---	---	---	---	---
TC0100007705.hg.1	65.936	60.9269	AZIN2	1p35.1	NM_001293562	RefSeq	Homo sapiens antizyme inhibitor 2 (AZIN2), transcript variant 2, mRNA.	FALSE	Hs.101807	chr1	+	33081104	33120531	Q96A70	GO:0006595 // GO:0007283 // GO:0015847 // GO:0033387 // GO:0034641 // GO:0042177 // GO:0042177 // GO:0043085 // GO:0043085 // GO:0044281 // GO:0097055 // GO:0098629 // GO:1902269 // GO:0006591 // GO:0006596 // GO:0006810 // GO:0015847 // GO:0033387 // GO:0043085 // GO:0043085 // GO:1902269	polyamine metabolic process // spermatogenesis // putrescine transport // putrescine biosynthetic process from ornithine // cellular nitrogen compound metabolic process // negative regulation of protein catabolic process // negative regulation of protein catabolic process // positive regulation of catalytic activity // positive regulation of catalytic activity // small molecule metabolic process …	GO:0005634 // GO:0005737 // GO:0005739 // GO:0005801 // GO:0005802 // GO:0005829 // GO:0030133 // GO:0030424 // GO:0030425 // GO:0031410 // GO:0033116 // GO:0043204 // GO:0048471 // GO:1990005 // GO:0005634 // GO:0005737 // GO:0005737 // GO:0005793 // GO:0005794 // GO:0005801 // GO:0016020 // GO:0016023 // GO:0030424 // GO:0030425 // GO:0031410 // GO:0033116 // GO:0042995 // GO:0043204 // GO:0048…	nucleus // cytoplasm // mitochondrion // cis-Golgi network // trans-Golgi network // cytosol // transport vesicle // axon // dendrite // cytoplasmic vesicle // endoplasmic reticulum-Golgi intermediate compartment membrane // perikaryon // perinuclear region of cytoplasm // granular vesicle // nucleus // cytoplasm // cytoplasm // endoplasmic reticulum-Golgi intermediate compartment // Golgi appara…	GO:0004586 // GO:0005515 // GO:0015489 // GO:0042978 // GO:0042978 // GO:0003824 // GO:0004586 // GO:0015489 // GO:0042978	ornithine decarboxylase activity // protein binding // putrescine transmembrane transporter activity // ornithine decarboxylase activator activity // ornithine decarboxylase activator activity // catalytic activity // ornithine decarboxylase activity // putrescine transmembrane transporter activity // ornithine decarboxylase activator activity	---	---
TC0100007716.hg.1	274.313	258.132	ZNF362	1p35.1	NM_152493	RefSeq	Homo sapiens zinc finger protein 362 (ZNF362), mRNA.	FALSE	Hs.743358	chr1	+	33256545	33300719	Q5T0B9	GO:0006351 // GO:0006355	transcription, DNA-templated // regulation of transcription, DNA-templated	GO:0005634 // GO:0016020 // GO:0016021	nucleus // membrane // integral component of membrane	GO:0003677 // GO:0046872 // GO:0003676	DNA binding // metal ion binding // nucleic acid binding	---	---
TC0100007725.hg.1	77.8627	64.4106	ZSCAN20	1p34.3	NM_145238	RefSeq	Homo sapiens zinc finger and SCAN domain containing 20 (ZSCAN20), mRNA.	FALSE	Hs.442705	chr1	+	33472631	33496507	P17040	GO:0006351 // GO:0006355 // GO:0006355 // GO:0006355	transcription, DNA-templated // regulation of transcription, DNA-templated // regulation of transcription, DNA-templated // regulation of transcription, DNA-templated	GO:0005654 // GO:0005622 // GO:0005634 // GO:0005654	nucleoplasm // intracellular // nucleus // nucleoplasm	GO:0000977 // GO:0003700 // GO:0046872 // GO:0000977 // GO:0003676 // GO:0003677 // GO:0003700 // GO:0003700	RNA polymerase II regulatory region sequence-specific DNA binding // transcription factor activity, sequence-specific DNA binding // metal ion binding // RNA polymerase II regulatory region sequence-specific DNA binding // nucleic acid binding // DNA binding // transcription factor activity, sequence-specific DNA binding // transcription factor activity, sequence-specific DNA binding	---	---
TC0100007734.hg.1	10.8345	17.566	HMGB4	1p35.1	NM_145205	RefSeq	Homo sapiens high mobility group box 4 (HMGB4), transcript variant 1, mRNA.	FALSE	Hs.568628	chr1	+	33860475	33864791	Q8WW32	GO:0006338 // GO:0006355 // GO:0006338 // GO:0006355	chromatin remodeling // regulation of transcription, DNA-templated // chromatin remodeling // regulation of transcription, DNA-templated	GO:0005634 // GO:0005694 // GO:0005634	nucleus // chromosome // nucleus	GO:0003677 // GO:0003682 // GO:0005515 // GO:0003682	DNA binding // chromatin binding // protein binding // chromatin binding	---	---
TC0100007739.hg.1	57.2787	50.2464	C1orf94	1p34.3	NM_001134734	RefSeq	Homo sapiens chromosome 1 open reading frame 94 (C1orf94), transcript variant 1, mRNA.	FALSE	Hs.194610	chr1	+	34166883	34219131	Q6P1W5	---	---	---	---	GO:0005515	protein binding	---	---
TC0100007745.hg.1	20.538	21.4063	GJB5	1p35.1	NM_005268	RefSeq	Homo sapiens gap junction protein, beta 5, 31.1kDa (GJB5), mRNA.	FALSE	Hs.198249	chr1	+	34755047	34758512	O95377	GO:0007154 // GO:0008544 // GO:0060707 // GO:0060708 // GO:0060713	cell communication // epidermis development // trophoblast giant cell differentiation // spongiotrophoblast differentiation // labyrinthine layer morphogenesis	GO:0005922 // GO:0016021 // GO:0005886 // GO:0005921 // GO:0016020 // GO:0030054	connexon complex // integral component of membrane // plasma membrane // gap junction // membrane // cell junction	---	---	GenMAPP	Calcium_regulation_in_cardiac_cells
TC0100007746.hg.1	9.48046	12.0317	GJB4	1p34.3	NM_153212	RefSeq	Homo sapiens gap junction protein, beta 4, 30.3kDa (GJB4), mRNA.	FALSE	Hs.351203	chr1	+	34759741	34763724	Q9NTQ9	GO:0007154 // GO:0007608 // GO:0042048	cell communication // sensory perception of smell // olfactory behavior	GO:0005922 // GO:0016021 // GO:0005886 // GO:0005921 // GO:0016020 // GO:0030054	connexon complex // integral component of membrane // plasma membrane // gap junction // membrane // cell junction	---	---	GenMAPP	Calcium_regulation_in_cardiac_cells
TC0100007747.hg.1	13.7325	18.3479	GJB3	1p34	NM_001005752	RefSeq	Homo sapiens gap junction protein, beta 3, 31kDa (GJB3), transcript variant 2, mRNA.	FALSE	Hs.522561	chr1	+	34781189	34786369	O75712	GO:0001701 // GO:0001890 // GO:0007154 // GO:0007605 // GO:0043588 // GO:0055085	in utero embryonic development // placenta development // cell communication // sensory perception of sound // skin development // transmembrane transport	GO:0005737 // GO:0005921 // GO:0005922 // GO:0016021 // GO:0005886 // GO:0005911 // GO:0005921 // GO:0016020 // GO:0030054	cytoplasm // gap junction // connexon complex // integral component of membrane // plasma membrane // cell-cell junction // gap junction // membrane // cell junction	GO:0005243	gap junction channel activity	GenMAPP	Calcium_regulation_in_cardiac_cells
TC0100007748.hg.1	27.896	20.9591	GJA4	1p35.1	NM_002060	RefSeq	Homo sapiens gap junction protein, alpha 4, 37kDa (GJA4), mRNA.	FALSE	Hs.296310	chr1	+	34792998	34795747	P35212	GO:0001568 // GO:0003158 // GO:0006810 // GO:0006816 // GO:0007043 // GO:0007267 // GO:0048265 // GO:0007154	blood vessel development // endothelium development // transport // calcium ion transport // cell-cell junction assembly // cell-cell signaling // response to pain // cell communication	GO:0005887 // GO:0005921 // GO:0005922 // GO:0005886 // GO:0005921 // GO:0016020 // GO:0016021 // GO:0030054	integral component of plasma membrane // gap junction // connexon complex // plasma membrane // gap junction // membrane // integral component of membrane // cell junction	GO:0005515	protein binding	GenMAPP // GenMAPP	Ovarian_Infertility_Genes // Calcium_regulation_in_cardiac_cells
TC0100007760.hg.1	528.77	362.891	ZMYM1	1p34.3	NM_001289088	RefSeq	Homo sapiens zinc finger, MYM-type 1 (ZMYM1), transcript variant 1, mRNA.	FALSE	Hs.471243	chr1	+	35059786	35115859	Q5SVZ6	---	---	GO:0005634	nucleus	GO:0003676 // GO:0008270 // GO:0046983 // GO:0046872	nucleic acid binding // zinc ion binding // protein dimerization activity // metal ion binding	---	---
TC0100007765.hg.1	692.619	647.266	ZMYM4	1p32-p34	NM_005095	RefSeq	Homo sapiens zinc finger, MYM-type 4 (ZMYM4), mRNA.	FALSE	Hs.269211	chr1	+	35268967	35422058	Q5VZL5	GO:0007010 // GO:0007275 // GO:0022604	cytoskeleton organization // multicellular organismal development // regulation of cell morphogenesis	---	---	GO:0003677 // GO:0005515 // GO:0008270 // GO:0046872	DNA binding // protein binding // zinc ion binding // metal ion binding	---	---
TC0100007777.hg.1	159.807	160.043	NCDN	1p34.3	NM_001014839	RefSeq	Homo sapiens neurochondrin (NCDN), transcript variant 1, mRNA.	FALSE	Hs.121870	chr1	+	35557473	35567274	Q9UBB6	GO:0031175 // GO:0045453 // GO:0048168 // GO:0031175	neuron projection development // bone resorption // regulation of neuronal synaptic plasticity // neuron projection development	GO:0005634 // GO:0005829 // GO:0016020 // GO:0030424 // GO:0030425 // GO:0043025 // GO:0005737 // GO:0005829 // GO:0030425 // GO:0042995 // GO:0043005 // GO:0043025	nucleus // cytosol // membrane // axon // dendrite // neuronal cell body // cytoplasm // cytosol // dendrite // cell projection // neuron projection // neuronal cell body	GO:0005515	protein binding	---	---
TC0100007778.hg.1	46.0676	42.6943	TFAP2E	1p34.3	NM_178548	RefSeq	Homo sapiens transcription factor AP-2 epsilon (activating enhancer binding protein 2 epsilon) (TFAP2E), mRNA.	FALSE	Hs.567844	chr1	+	35573370	35595328	Q6VUC0	GO:0006357 // GO:0006366 // GO:0042127 // GO:0045944 // GO:0048856 // GO:0006351 // GO:0006355 // GO:0006357 // GO:0042127 // GO:0048856	regulation of transcription from RNA polymerase II promoter // transcription from RNA polymerase II promoter // regulation of cell proliferation // positive regulation of transcription from RNA polymerase II promoter // anatomical structure development // transcription, DNA-templated // regulation of transcription, DNA-templated // regulation of transcription from RNA polymerase II promoter // re…	GO:0005634 // GO:0005634 // GO:0005634	nucleus // nucleus // nucleus	GO:0000977 // GO:0000978 // GO:0000981 // GO:0001077 // GO:0042803 // GO:0046982 // GO:0000977 // GO:0000981 // GO:0003677 // GO:0003700	RNA polymerase II regulatory region sequence-specific DNA binding // RNA polymerase II core promoter proximal region sequence-specific DNA binding // RNA polymerase II transcription factor activity, sequence-specific DNA binding // transcriptional activator activity, RNA polymerase II core promoter proximal region sequence-specific binding // protein homodimerization activity // protein heterodim…	---	---
TC0100007784.hg.1	376.669	352.831	AGO4	1p34	NM_017629	RefSeq	Homo sapiens argonaute RISC catalytic component 4 (AGO4), mRNA.	FALSE	Hs.744858	chr1	+	35808172	35857890	Q9HCK5	GO:0006402 // GO:0007173 // GO:0007219 // GO:0008543 // GO:0010467 // GO:0010501 // GO:0010501 // GO:0031047 // GO:0031054 // GO:0035194 // GO:0035196 // GO:0035278 // GO:0035279 // GO:0035280 // GO:0038095 // GO:0045087 // GO:0048011 // GO:0048015 // GO:0090625 // GO:0006417 // GO:0031047 // GO:0035278	mRNA catabolic process // epidermal growth factor receptor signaling pathway // Notch signaling pathway // fibroblast growth factor receptor signaling pathway // gene expression // RNA secondary structure unwinding // RNA secondary structure unwinding // gene silencing by RNA // pre-miRNA processing // posttranscriptional gene silencing by RNA // production of miRNAs involved in gene silencing by…	GO:0000932 // GO:0005737 // GO:0005829 // GO:0016020 // GO:0016442 // GO:0035068 // GO:0070578 // GO:0005737 // GO:0016442 // GO:0030529	cytoplasmic mRNA processing body // cytoplasm // cytosol // membrane // RISC complex // micro-ribonucleoprotein complex // RISC-loading complex // cytoplasm // RISC complex // ribonucleoprotein complex	GO:0003725 // GO:0003727 // GO:0005515 // GO:0035198 // GO:0003676 // GO:0003723 // GO:0035198	double-stranded RNA binding // single-stranded RNA binding // protein binding // miRNA binding // nucleic acid binding // RNA binding // miRNA binding	---	---
TC0100007786.hg.1	1750.84	1561.67	AGO1	1p34.3	NM_012199	RefSeq	Homo sapiens argonaute RISC catalytic component 1 (AGO1), mRNA.	FALSE	Hs.22867	chr1	+	35869808	35929610	Q9UL18	GO:0000956 // GO:0006351 // GO:0007173 // GO:0007219 // GO:0008543 // GO:0010467 // GO:0010501 // GO:0010501 // GO:0010586 // GO:0031047 // GO:0031054 // GO:0035194 // GO:0035196 // GO:0035278 // GO:0035279 // GO:0035280 // GO:0038095 // GO:0045087 // GO:0045944 // GO:0048011 // GO:0048015 // GO:0090625 // GO:0006355 // GO:0006417 // GO:0010628 // GO:0031047 // GO:0006413	nuclear-transcribed mRNA catabolic process // transcription, DNA-templated // epidermal growth factor receptor signaling pathway // Notch signaling pathway // fibroblast growth factor receptor signaling pathway // gene expression // RNA secondary structure unwinding // RNA secondary structure unwinding // miRNA metabolic process // gene silencing by RNA // pre-miRNA processing // posttranscriptio…	GO:0000932 // GO:0005634 // GO:0005654 // GO:0005737 // GO:0005829 // GO:0005844 // GO:0016442 // GO:0030529 // GO:0035068 // GO:0070578 // GO:0005634 // GO:0005737 // GO:0005829 // GO:0030529	cytoplasmic mRNA processing body // nucleus // nucleoplasm // cytoplasm // cytosol // polysome // RISC complex // ribonucleoprotein complex // micro-ribonucleoprotein complex // RISC-loading complex // nucleus // cytoplasm // cytosol // ribonucleoprotein complex	GO:0000978 // GO:0000993 // GO:0001047 // GO:0003723 // GO:0003725 // GO:0003727 // GO:0004521 // GO:0005515 // GO:0035198 // GO:0044822 // GO:0003676 // GO:0003723 // GO:0044212 // GO:0003743	RNA polymerase II core promoter proximal region sequence-specific DNA binding // RNA polymerase II core binding // core promoter binding // RNA binding // double-stranded RNA binding // single-stranded RNA binding // endoribonuclease activity // protein binding // miRNA binding // poly(A) RNA binding // nucleic acid binding // RNA binding // transcription regulatory region DNA binding // translat…	---	---
TC0100007789.hg.1	2789.08	2560.09	AGO3	1p34	NM_024852	RefSeq	Homo sapiens argonaute RISC catalytic component 3 (AGO3), transcript variant 1, mRNA.	FALSE	Hs.657659	chr1	+	35930718	36072500	Q9H9G7	GO:0006402 // GO:0007173 // GO:0007219 // GO:0008543 // GO:0010467 // GO:0010501 // GO:0010501 // GO:0031047 // GO:0031054 // GO:0035194 // GO:0035196 // GO:0035278 // GO:0035279 // GO:0035280 // GO:0038095 // GO:0045087 // GO:0048011 // GO:0048015 // GO:0072091 // GO:0090625 // GO:0006417 // GO:0031047 // GO:0035278 // GO:0072091 // GO:0006413	mRNA catabolic process // epidermal growth factor receptor signaling pathway // Notch signaling pathway // fibroblast growth factor receptor signaling pathway // gene expression // RNA secondary structure unwinding // RNA secondary structure unwinding // gene silencing by RNA // pre-miRNA processing // posttranscriptional gene silencing by RNA // production of miRNAs involved in gene silencing by…	GO:0000932 // GO:0005737 // GO:0005829 // GO:0016020 // GO:0016442 // GO:0035068 // GO:0070578 // GO:0005737 // GO:0016442 // GO:0030529	cytoplasmic mRNA processing body // cytoplasm // cytosol // membrane // RISC complex // micro-ribonucleoprotein complex // RISC-loading complex // cytoplasm // RISC complex // ribonucleoprotein complex	GO:0003725 // GO:0003727 // GO:0005515 // GO:0035198 // GO:0044822 // GO:0003676 // GO:0003723 // GO:0035198 // GO:0003743	double-stranded RNA binding // single-stranded RNA binding // protein binding // miRNA binding // poly(A) RNA binding // nucleic acid binding // RNA binding // miRNA binding // translation initiation factor activity	---	---
TC0100007790.hg.1	12.2994	10.7248	TEKT2	1p34.3	NM_014466	RefSeq	Homo sapiens tektin 2 (testicular) (TEKT2), mRNA.	FALSE	Hs.127111	chr1	+	36084075	36088275	Q9UIF3	GO:0030317 // GO:0036159 // GO:0030030	sperm motility // inner dynein arm assembly // cell projection organization	GO:0005634 // GO:0005737 // GO:0005874 // GO:0031514 // GO:0005856 // GO:0005929 // GO:0042995	nucleus // cytoplasm // microtubule // motile cilium // cytoskeleton // cilium // cell projection	---	---	---	---
TC0100007791.hg.1	70.3119	59.8122	ADPRHL2	1p34.3	NM_017825	RefSeq	Homo sapiens ADP-ribosylhydrolase like 2 (ADPRHL2), mRNA.	FALSE	Hs.18021	chr1	+	36088852	36093932	Q9NX46	GO:0008152 // GO:0071451	metabolic process // cellular response to superoxide	GO:0005654 // GO:0005759 // GO:0005634 // GO:0005737 // GO:0005739	nucleoplasm // mitochondrial matrix // nucleus // cytoplasm // mitochondrion	GO:0004649 // GO:0046872 // GO:0016787	poly(ADP-ribose) glycohydrolase activity // metal ion binding // hydrolase activity	---	---
TC0100007794.hg.1	4680.54	5132.77	MAP7D1	1p34.3	NM_001286365	RefSeq	Homo sapiens MAP7 domain containing 1 (MAP7D1), transcript variant 2, mRNA.	FALSE	Hs.356096	chr1	+	36155579	36180849	Q3KQU3	GO:0000226 // GO:0000226 // GO:0000226	microtubule cytoskeleton organization // microtubule cytoskeleton organization // microtubule cytoskeleton organization	GO:0005737 // GO:0005819 // GO:0015630 // GO:0005737 // GO:0005737 // GO:0005856 // GO:0015630 // GO:0015630	cytoplasm // spindle // microtubule cytoskeleton // cytoplasm // cytoplasm // cytoskeleton // microtubule cytoskeleton // microtubule cytoskeleton	GO:0005198 // GO:0005198	structural molecule activity // structural molecule activity	---	---
TC0100007798.hg.1	4995.49	6205.66	THRAP3	1p34.3	NM_005119	RefSeq	Homo sapiens thyroid hormone receptor associated protein 3 (THRAP3), mRNA.	FALSE	Hs.744057	chr1	+	36224416	36305357	Q9Y2W1	GO:0000381 // GO:0000956 // GO:0006367 // GO:0006397 // GO:0007623 // GO:0008380 // GO:0030518 // GO:0030521 // GO:0042753 // GO:0045893 // GO:0045944 // GO:0048026 // GO:0048255 // GO:0006351 // GO:0006355 // GO:0048511	regulation of alternative mRNA splicing, via spliceosome // nuclear-transcribed mRNA catabolic process // transcription initiation from RNA polymerase II promoter // mRNA processing // circadian rhythm // RNA splicing // intracellular steroid hormone receptor signaling pathway // androgen receptor signaling pathway // positive regulation of circadian rhythm // positive regulation of transcription…	GO:0005634 // GO:0005654 // GO:0016592 // GO:0016607 // GO:0035145 // GO:0070062 // GO:0005634 // GO:0005654 // GO:0016607	nucleus // nucleoplasm // mediator complex // nuclear speck // exon-exon junction complex // extracellular exosome // nucleus // nucleoplasm // nuclear speck	GO:0001046 // GO:0001104 // GO:0003712 // GO:0003713 // GO:0004872 // GO:0005515 // GO:0005524 // GO:0030374 // GO:0042809 // GO:0044822 // GO:0046966 // GO:0051219 // GO:0000166 // GO:0001046 // GO:0003713	core promoter sequence-specific DNA binding // RNA polymerase II transcription cofactor activity // transcription cofactor activity // transcription coactivator activity // receptor activity // protein binding // ATP binding // ligand-dependent nuclear receptor transcription coactivator activity // vitamin D receptor binding // poly(A) RNA binding // thyroid hormone receptor binding // phosphopro…	---	---
TC0100007800.hg.1	104.555	37.5808	THRAP3	---	hsa_circ_0004157	circbase	Jeck2013 ALT_ACCEPTOR, ALT_DONOR, coding, INTERNAL, intronic best transcript NM_005119	FALSE	---	chr1	+	36287477	36288753	---	---	---	---	---	---	---	---	---
TC0100007813.hg.1	7.57563	7.53121	CSF3R	---	hsa_circ_0000055	circbase	Memczak2013 ANTISENSE, CDS, coding, INTERNAL best transcript NM_156039	FALSE	---	chr1	+	36473796	36475464	---	---	---	---	---	---	---	---	---
TC0100007832.hg.1	2473.55	2616.91	ZC3H12A	1p34.3	NM_025079	RefSeq	Homo sapiens zinc finger CCCH-type containing 12A (ZC3H12A), mRNA.	FALSE	Hs.656294	chr1	+	37474518	37484379	Q5D1E8	GO:0001525 // GO:0006915 // GO:0010508 // GO:0010628 // GO:0010629 // GO:0010884 // GO:0030154 // GO:0032088 // GO:0032715 // GO:0032720 // GO:0043031 // GO:0045019 // GO:0045600 // GO:0071222 // GO:0090305 // GO:2000379 // GO:0007275 // GO:0008152	angiogenesis // apoptotic process // positive regulation of autophagy // positive regulation of gene expression // negative regulation of gene expression // positive regulation of lipid storage // cell differentiation // negative regulation of NF-kappaB transcription factor activity // negative regulation of interleukin-6 production // negative regulation of tumor necrosis factor production // ne…	GO:0005654 // GO:0005737 // GO:0005886 // GO:0005634 // GO:0005737	nucleoplasm // cytoplasm // plasma membrane // nucleus // cytoplasm	GO:0004519 // GO:0005515 // GO:0046872 // GO:0004518 // GO:0016787	endonuclease activity // protein binding // metal ion binding // nuclease activity // hydrolase activity	---	---
TC0100007838.hg.1	100.451	103.595	DNALI1	1p35.1	NM_003462	RefSeq	Homo sapiens dynein, axonemal, light intermediate chain 1 (DNALI1), mRNA.	FALSE	Hs.406050	chr1	+	37556919	37566857	O14645	GO:0006928 // GO:0007338 // GO:0008152	movement of cell or subcellular component // single fertilization // metabolic process	GO:0005737 // GO:0005858 // GO:0005930 // GO:0030175 // GO:0005930 // GO:0030286	cytoplasm // axonemal dynein complex // axoneme // filopodium // axoneme // dynein complex	GO:0003777 // GO:0005515 // GO:0045504 // GO:0003774	microtubule motor activity // protein binding // dynein heavy chain binding // motor activity	---	---
TC0100007841.hg.1	2836.76	2408.45	CDCA8	1p34.3	NM_001256875	RefSeq	Homo sapiens cell division cycle associated 8 (CDCA8), transcript variant 1, mRNA.	FALSE	Hs.524571	chr1	+	37692401	37709719	Q53HL2	GO:0000278 // GO:0007080 // GO:0007264 // GO:0051276 // GO:0051301 // GO:0007049 // GO:0007067	mitotic cell cycle // mitotic metaphase plate congression // small GTPase mediated signal transduction // chromosome organization // cell division // cell cycle // mitotic nuclear division	GO:0000775 // GO:0005634 // GO:0005730 // GO:0005829 // GO:0010369 // GO:0030496 // GO:0032133 // GO:0043234 // GO:0045171 // GO:0051233 // GO:0000775 // GO:0005634 // GO:0005694 // GO:0005730 // GO:0005737 // GO:0005819 // GO:0005856 // GO:0051233	chromosome, centromeric region // nucleus // nucleolus // cytosol // chromocenter // midbody // chromosome passenger complex // protein complex // intercellular bridge // spindle midzone // chromosome, centromeric region // nucleus // chromosome // nucleolus // cytoplasm // spindle // cytoskeleton // spindle midzone	GO:0005515	protein binding	---	---
TC0100007845.hg.1	35.3799	29.9291	MANEAL	1p34.3	NM_001031740	RefSeq	Homo sapiens mannosidase, endo-alpha-like (MANEAL), transcript variant 1, mRNA.	FALSE	Hs.534562 // Hs.706404	chr1	+	37793802	37801606	Q5VSG8	GO:0008152	metabolic process	GO:0000139 // GO:0016021 // GO:0005794 // GO:0016020	Golgi membrane // integral component of membrane // Golgi apparatus // membrane	GO:0016787	hydrolase activity	---	---
TC0100007846.hg.1	186.249	137.04	C1orf122	1p34.3	NM_001142726	RefSeq	Homo sapiens chromosome 1 open reading frame 122 (C1orf122), transcript variant 2, mRNA.	FALSE	Hs.532749	chr1	+	37806979	37809454	Q6ZSJ8	---	---	---	---	---	---	---	---
TC0100007858.hg.1	2702.15	2633.92	UTP11L	1p34.3	NM_016037	RefSeq	Homo sapiens UTP11-like, U3 small nucleolar ribonucleoprotein (yeast) (UTP11L), mRNA.	FALSE	Hs.472038	chr1	+	38009258	38024825	Q9Y3A2	GO:0006364 // GO:0007399 // GO:0043065 // GO:0006364 // GO:0006364	rRNA processing // nervous system development // positive regulation of apoptotic process // rRNA processing // rRNA processing	GO:0005615 // GO:0005730 // GO:0005737 // GO:0032040 // GO:0005634 // GO:0005730 // GO:0032040 // GO:0032040	extracellular space // nucleolus // cytoplasm // small-subunit processome // nucleus // nucleolus // small-subunit processome // small-subunit processome	GO:0005515 // GO:0044822	protein binding // poly(A) RNA binding	---	---
TC0100007876.hg.1	26.5474	32.5922	RRAGC	---	hsa_circ_0000056	circbase	Memczak2013 ANTISENSE, coding, INTERNAL, intronic best transcript NM_022157	FALSE	---	chr1	+	38844140	38844253	---	---	---	---	---	---	---	---	---
TC0100007884.hg.1	1040.67	1283.15	AKIRIN1	1p34.3	NM_001136275	RefSeq	Homo sapiens akirin 1 (AKIRIN1), transcript variant 2, mRNA.	FALSE	Hs.293563	chr1	+	38991223	39006065	Q9H9L7	---	---	GO:0005634 // GO:0005654 // GO:0031965 // GO:0005634	nucleus // nucleoplasm // nuclear membrane // nucleus	GO:0005515	protein binding	---	---
TC0100007886.hg.1	4174.09	4780.06	NDUFS5	1p34.2-p33	NM_001184979	RefSeq	Homo sapiens NADH dehydrogenase (ubiquinone) Fe-S protein 5, 15kDa (NADH-coenzyme Q reductase) (NDUFS5), transcript variant 2, mRNA.	FALSE	Hs.632385	chr1	+	39026295	39034636	O43920	GO:0006120 // GO:0022904 // GO:0032981 // GO:0044237 // GO:0044281 // GO:0055114	mitochondrial electron transport, NADH to ubiquinone // respiratory electron transport chain // mitochondrial respiratory chain complex I assembly // cellular metabolic process // small molecule metabolic process // oxidation-reduction process	GO:0005739 // GO:0005743 // GO:0005747 // GO:0005747 // GO:0005758 // GO:0005739 // GO:0005743 // GO:0016020 // GO:0070469	mitochondrion // mitochondrial inner membrane // mitochondrial respiratory chain complex I // mitochondrial respiratory chain complex I // mitochondrial intermembrane space // mitochondrion // mitochondrial inner membrane // membrane // respiratory chain	GO:0008137	NADH dehydrogenase (ubiquinone) activity	GenMAPP	Electron_Transport_Chain
TC0100007898.hg.1	7594.61	6853.19	MACF1	1p32-p31	NM_012090	RefSeq	Homo sapiens microtubule-actin crosslinking factor 1 (MACF1), mRNA.	FALSE	Hs.472475 // Hs.692278	chr1	+	39081316	39487177	Q9UPN3	GO:0001707 // GO:0006620 // GO:0007050 // GO:0007163 // GO:0008152 // GO:0010632 // GO:0016055 // GO:0030177 // GO:0032886 // GO:0042060 // GO:0043001 // GO:0045773 // GO:0051893	mesoderm formation // posttranslational protein targeting to membrane // cell cycle arrest // establishment or maintenance of cell polarity // metabolic process // regulation of epithelial cell migration // Wnt signaling pathway // positive regulation of Wnt signaling pathway // regulation of microtubule-based process // wound healing // Golgi to plasma membrane protein transport // positive regu…	GO:0005737 // GO:0005737 // GO:0005794 // GO:0005856 // GO:0005874 // GO:0005886 // GO:0015629 // GO:0032587 // GO:0097481 // GO:0005737 // GO:0005794 // GO:0005856 // GO:0005874 // GO:0005886 // GO:0015630 // GO:0016020 // GO:0032587 // GO:0042995 // GO:0016021	cytoplasm // cytoplasm // Golgi apparatus // cytoskeleton // microtubule // plasma membrane // actin cytoskeleton // ruffle membrane // neuronal postsynaptic density // cytoplasm // Golgi apparatus // cytoskeleton // microtubule // plasma membrane // microtubule cytoskeleton // membrane // ruffle membrane // cell projection // integral component of membrane	GO:0003779 // GO:0005509 // GO:0005515 // GO:0008017 // GO:0016887 // GO:0044822 // GO:0051015 // GO:0003779 // GO:0016887 // GO:0046872	actin binding // calcium ion binding // protein binding // microtubule binding // ATPase activity // poly(A) RNA binding // actin filament binding // actin binding // ATPase activity // metal ion binding	---	---
TC0100007909.hg.1	20.9023	21.5771	BMP8A	1p34.3	NM_181809	RefSeq	Homo sapiens bone morphogenetic protein 8a (BMP8A), mRNA.	FALSE	Hs.472497	chr1	+	39491646	39529869	Q7Z5Y6	GO:0001503 // GO:0002024 // GO:0010862 // GO:0030509 // GO:0040007 // GO:0042981 // GO:0043408 // GO:0046676 // GO:0048468 // GO:0051216 // GO:0060395 // GO:2000505 // GO:0007275 // GO:0010862 // GO:0030154 // GO:0030509 // GO:0042981 // GO:0043408 // GO:0048468 // GO:0060395	ossification // diet induced thermogenesis // positive regulation of pathway-restricted SMAD protein phosphorylation // BMP signaling pathway // growth // regulation of apoptotic process // regulation of MAPK cascade // negative regulation of insulin secretion // cell development // cartilage development // SMAD protein signal transduction // regulation of energy homeostasis // multicellular orga…	GO:0005615 // GO:0005576 // GO:0005615 // GO:0005615	extracellular space // extracellular region // extracellular space // extracellular space	GO:0005125 // GO:0005160 // GO:0008083 // GO:0070700 // GO:0005125 // GO:0005125 // GO:0005160 // GO:0070700	cytokine activity // transforming growth factor beta receptor binding // growth factor activity // BMP receptor binding // cytokine activity // cytokine activity // transforming growth factor beta receptor binding // BMP receptor binding	---	---
TC0100007910.hg.1	97.0186	72.2962	OXCT2P1	1p34.3	BC072388	GenBank	Homo sapiens 3-oxoacid CoA transferase 2, mRNA (cDNA clone MGC:87924 IMAGE:5588771), complete cds.	FALSE	Hs.472491	chr1	+	39514866	39516667	Q6INA3	GO:0008152 // GO:0046952	metabolic process // ketone body catabolic process	GO:0005739 // GO:0005739 // GO:0031514	mitochondrion // mitochondrion // motile cilium	GO:0008410 // GO:0008260 // GO:0016740	CoA-transferase activity // 3-oxoacid CoA-transferase activity // transferase activity	---	---
TC0100007920.hg.1	2052.16	1790.75	PPIE	1p32	NM_001195007	RefSeq	Homo sapiens peptidylprolyl isomerase E (cyclophilin E) (PPIE), transcript variant 4, mRNA.	FALSE	Hs.524690	chr1	+	39692182	39763914	Q9UNP9	GO:0000398 // GO:0000413 // GO:0006281 // GO:0006283 // GO:0006289 // GO:0006355 // GO:0006457 // GO:0045070 // GO:0000413 // GO:0000413 // GO:0006397 // GO:0008380	mRNA splicing, via spliceosome // protein peptidyl-prolyl isomerization // DNA repair // transcription-coupled nucleotide-excision repair // nucleotide-excision repair // regulation of transcription, DNA-templated // protein folding // positive regulation of viral genome replication // protein peptidyl-prolyl isomerization // protein peptidyl-prolyl isomerization // mRNA processing // RNA splicing	GO:0005634 // GO:0005654 // GO:0071013 // GO:0005634 // GO:0005681	nucleus // nucleoplasm // catalytic step 2 spliceosome // nucleus // spliceosomal complex	GO:0000166 // GO:0003723 // GO:0003755 // GO:0005515 // GO:0016018 // GO:0044822 // GO:0003676 // GO:0003723 // GO:0003755 // GO:0016853	nucleotide binding // RNA binding // peptidyl-prolyl cis-trans isomerase activity // protein binding // cyclosporin A binding // poly(A) RNA binding // nucleic acid binding // RNA binding // peptidyl-prolyl cis-trans isomerase activity // isomerase activity	---	---
TC0100007922.hg.1	133.271	155.817	PPIE	---	PPIE.uAug10	Ace View	Transcript Identified by AceView, Entrez Gene ID(s) 10450	FALSE	---	chr1	+	39758707	39760392	---	---	---	---	---	---	---	---	---
TC0100007936.hg.1	559.693	551.108	MFSD2A	1p34.2	NM_001136493	RefSeq	Homo sapiens major facilitator superfamily domain containing 2A (MFSD2A), transcript variant 1, mRNA.	FALSE	Hs.655177	chr1	+	39955112	39969968	Q8NA29	GO:0015908 // GO:0015914 // GO:0045056 // GO:0055085 // GO:0055085 // GO:0060856 // GO:1990379 // GO:0006810 // GO:0006869 // GO:0015908 // GO:0045056 // GO:0060856 // GO:1990379	fatty acid transport // phospholipid transport // transcytosis // transmembrane transport // transmembrane transport // establishment of blood-brain barrier // lipid transport across blood brain barrier // transport // lipid transport // fatty acid transport // transcytosis // establishment of blood-brain barrier // lipid transport across blood brain barrier	GO:0005737 // GO:0005789 // GO:0005886 // GO:0005887 // GO:0005783 // GO:0005886 // GO:0005887 // GO:0016020 // GO:0016021	cytoplasm // endoplasmic reticulum membrane // plasma membrane // integral component of plasma membrane // endoplasmic reticulum // plasma membrane // integral component of plasma membrane // membrane // integral component of membrane	GO:0005548 // GO:0015293 // GO:0005548 // GO:0015293	phospholipid transporter activity // symporter activity // phospholipid transporter activity // symporter activity	---	---
TC0100007940.hg.1	68671.7	70655.1	CAP1	1p34.2	NM_001105530	RefSeq	Homo sapiens CAP, adenylate cyclase-associated protein 1 (yeast) (CAP1), transcript variant 2, mRNA.	FALSE	Hs.370581	chr1	+	40040233	40072649	Q01518	GO:0001667 // GO:0002576 // GO:0006898 // GO:0007163 // GO:0007165 // GO:0007190 // GO:0007411 // GO:0007596 // GO:0030036 // GO:0030168 // GO:0000902 // GO:0007010	ameboidal-type cell migration // platelet degranulation // receptor-mediated endocytosis // establishment or maintenance of cell polarity // signal transduction // activation of adenylate cyclase activity // axon guidance // blood coagulation // actin cytoskeleton organization // platelet activation // cell morphogenesis // cytoskeleton organization	GO:0005886 // GO:0005925 // GO:0030864 // GO:0070062 // GO:0005737 // GO:0016020	plasma membrane // focal adhesion // cortical actin cytoskeleton // extracellular exosome // cytoplasm // membrane	GO:0003779	actin binding	---	---
TC0100007943.hg.1	1753.04	1503.14	RLF	1p32	NM_012421	RefSeq	Homo sapiens rearranged L-myc fusion (RLF), mRNA.	FALSE	Hs.205627	chr1	+	40161369	40240921	Q13129	GO:0006351 // GO:0006355 // GO:0015074 // GO:0045893 // GO:0045944 // GO:0051276 // GO:0051276 // GO:0006355	transcription, DNA-templated // regulation of transcription, DNA-templated // DNA integration // positive regulation of transcription, DNA-templated // positive regulation of transcription from RNA polymerase II promoter // chromosome organization // chromosome organization // regulation of transcription, DNA-templated	GO:0005634 // GO:0005634	nucleus // nucleus	GO:0003677 // GO:0005515 // GO:0008270 // GO:0003676 // GO:0003677 // GO:0046872	DNA binding // protein binding // zinc ion binding // nucleic acid binding // DNA binding // metal ion binding	---	---
TC0100007948.hg.1	11.9117	9.9023	TMCO2	1p34.2	NM_001008740	RefSeq	Homo sapiens transmembrane and coiled-coil domains 2 (TMCO2), mRNA.	FALSE	Hs.406265	chr1	+	40245947	40251693	Q7Z6W1	---	---	GO:0005634 // GO:0016021 // GO:0016020	nucleus // integral component of membrane // membrane	---	---	---	---
TC0100007949.hg.1	3052.91	2835.7	ZMPSTE24	1p34	NM_005857	RefSeq	Homo sapiens zinc metallopeptidase STE24 (ZMPSTE24), mRNA.	FALSE	Hs.132642	chr1	+	40258050	40294184	O75844	GO:0006508 // GO:0006998 // GO:0030327 // GO:0071586 // GO:0006508	proteolysis // nuclear envelope organization // prenylated protein catabolic process // CAAX-box protein processing // proteolysis	GO:0005637 // GO:0005789 // GO:0016020 // GO:0016021 // GO:0070062 // GO:0005634 // GO:0005783 // GO:0016020	nuclear inner membrane // endoplasmic reticulum membrane // membrane // integral component of membrane // extracellular exosome // nucleus // endoplasmic reticulum // membrane	GO:0004222 // GO:0008235 // GO:0046872 // GO:0008233 // GO:0008237 // GO:0016787	metalloendopeptidase activity // metalloexopeptidase activity // metal ion binding // peptidase activity // metallopeptidase activity // hydrolase activity	---	---
TC0100007954.hg.1	9125.03	9269.62	SMAP2	1p35.3-p34.1	NM_001198978	RefSeq	Homo sapiens small ArfGAP2 (SMAP2), transcript variant 3, mRNA.	FALSE	Hs.15200	chr1	+	40344850	40423326	Q8WU79	GO:0043547	positive regulation of GTPase activity	GO:0005654 // GO:0005737 // GO:0005737	nucleoplasm // cytoplasm // cytoplasm	GO:0005096 // GO:0005515 // GO:0046872	GTPase activator activity // protein binding // metal ion binding	---	---
TC0100007958.hg.1	57.0165	67.0978	ZFP69B	1p34.2	NM_023070	RefSeq	Homo sapiens ZFP69 zinc finger protein B (ZFP69B), mRNA.	FALSE	Hs.133034	chr1	+	40450102	40463718	Q9UJL9	GO:0006351 // GO:0006355	transcription, DNA-templated // regulation of transcription, DNA-templated	GO:0005634 // GO:0005622	nucleus // intracellular	GO:0003677 // GO:0003700 // GO:0005515 // GO:0046872 // GO:0003676	DNA binding // transcription factor activity, sequence-specific DNA binding // protein binding // metal ion binding // nucleic acid binding	---	---
TC0100007961.hg.1	86.4815	75.1405	ZFP69	1p34.2	NM_198494	RefSeq	Homo sapiens ZFP69 zinc finger protein (ZFP69), mRNA.	FALSE	Hs.434385	chr1	+	40477215	40496343	Q49AA0	GO:0006351 // GO:0006355	transcription, DNA-templated // regulation of transcription, DNA-templated	GO:0005634 // GO:0005622	nucleus // intracellular	GO:0003677 // GO:0046872 // GO:0003676	DNA binding // metal ion binding // nucleic acid binding	---	---
TC0100007963.hg.1	55.508	57.2034	EXO5	1p34.2	NM_022774	RefSeq	Homo sapiens exonuclease 5 (EXO5), mRNA.	FALSE	Hs.59584	chr1	+	40508741	40516556	Q9H790	GO:0036297 // GO:0090305 // GO:0090305 // GO:0006281 // GO:0006974	interstrand cross-link repair // nucleic acid phosphodiester bond hydrolysis // nucleic acid phosphodiester bond hydrolysis // DNA repair // cellular response to DNA damage stimulus	GO:0005634 // GO:0005654 // GO:0005737 // GO:0005829 // GO:0005634 // GO:0005737 // GO:0005829	nucleus // nucleoplasm // cytoplasm // cytosol // nucleus // cytoplasm // cytosol	GO:0003677 // GO:0008310 // GO:0042803 // GO:0045145 // GO:0046872 // GO:0051539 // GO:0004518 // GO:0004527 // GO:0016787 // GO:0045145 // GO:0051536 // GO:0051539	DNA binding // single-stranded DNA 3'-5' exodeoxyribonuclease activity // protein homodimerization activity // single-stranded DNA 5'-3' exodeoxyribonuclease activity // metal ion binding // 4 iron, 4 sulfur cluster binding // nuclease activity // exonuclease activity // hydrolase activity // single-stranded DNA 5'-3' exodeoxyribonuclease activity // iron-sulfur cluster binding // 4 iron, 4 sulfu…	---	---
TC0100007964.hg.1	395.904	293.77	ZNF684	1p34.2	NM_152373	RefSeq	Homo sapiens zinc finger protein 684 (ZNF684), mRNA.	FALSE	Hs.524767	chr1	+	40531561	40548169	Q5T5D7	GO:0006351 // GO:0006355	transcription, DNA-templated // regulation of transcription, DNA-templated	GO:0005634 // GO:0005622	nucleus // intracellular	GO:0003677 // GO:0046872 // GO:0003676	DNA binding // metal ion binding // nucleic acid binding	---	---
TC0100007968.hg.1	3582.77	3786.48	NFYC	1p32	NM_001142587	RefSeq	Homo sapiens nuclear transcription factor Y, gamma (NFYC), transcript variant 3, mRNA.	FALSE	Hs.713051	chr1	+	40691570	40771606	Q13952	GO:0006355 // GO:0006357 // GO:0006366 // GO:0006457 // GO:0044281 // GO:0045944 // GO:0006351 // GO:0006355 // GO:0045893	regulation of transcription, DNA-templated // regulation of transcription from RNA polymerase II promoter // transcription from RNA polymerase II promoter // protein folding // small molecule metabolic process // positive regulation of transcription from RNA polymerase II promoter // transcription, DNA-templated // regulation of transcription, DNA-templated // positive regulation of transcription…	GO:0005634 // GO:0005654 // GO:0005654 // GO:0016602 // GO:0032993 // GO:0005634 // GO:0016602	nucleus // nucleoplasm // nucleoplasm // CCAAT-binding factor complex // protein-DNA complex // nucleus // CCAAT-binding factor complex	GO:0000978 // GO:0001077 // GO:0003677 // GO:0003700 // GO:0003713 // GO:0005515 // GO:0008134 // GO:0044212 // GO:0046982 // GO:0003677 // GO:0003700	RNA polymerase II core promoter proximal region sequence-specific DNA binding // transcriptional activator activity, RNA polymerase II core promoter proximal region sequence-specific binding // DNA binding // transcription factor activity, sequence-specific DNA binding // transcription coactivator activity // protein binding // transcription factor binding // transcription regulatory region DNA b…	---	---
TC0100007971.hg.1	36.6819	48.3704	KCNQ4	1p34	NM_004700	RefSeq	Homo sapiens potassium channel, voltage gated KQT-like subfamily Q, member 4 (KCNQ4), transcript variant 1, mRNA.	FALSE	Hs.473058	chr1	+	40784012	40840452	P56696	GO:0006813 // GO:0007268 // GO:0007605 // GO:0034765 // GO:0042472 // GO:0071805 // GO:0006810 // GO:0006811 // GO:0006813 // GO:0007605 // GO:0055085 // GO:0071805 // GO:0071805	potassium ion transport // synaptic transmission // sensory perception of sound // regulation of ion transmembrane transport // inner ear morphogenesis // potassium ion transmembrane transport // transport // ion transport // potassium ion transport // sensory perception of sound // transmembrane transport // potassium ion transmembrane transport // potassium ion transmembrane transport	GO:0005886 // GO:0008076 // GO:0009925 // GO:0016021 // GO:0005886 // GO:0016020 // GO:0016021 // GO:0016021	plasma membrane // voltage-gated potassium channel complex // basal plasma membrane // integral component of membrane // plasma membrane // membrane // integral component of membrane // integral component of membrane	GO:0005251 // GO:0005267 // GO:0005515 // GO:0005216 // GO:0005244 // GO:0005249 // GO:0005251 // GO:0005267	delayed rectifier potassium channel activity // potassium channel activity // protein binding // ion channel activity // voltage-gated ion channel activity // voltage-gated potassium channel activity // delayed rectifier potassium channel activity // potassium channel activity	---	---
TC0100007980.hg.1	1477.07	1306.73	CTPS1	1p34.1	NM_001301237	RefSeq	Homo sapiens CTP synthase 1 (CTPS1), transcript variant 2, mRNA.	FALSE	Hs.473087	chr1	+	40979299	41012565	P17812	GO:0006139 // GO:0006241 // GO:0006241 // GO:0006541 // GO:0015949 // GO:0042098 // GO:0042100 // GO:0042493 // GO:0044210 // GO:0044281 // GO:0055086 // GO:0002376 // GO:0006221	nucleobase-containing compound metabolic process // CTP biosynthetic process // CTP biosynthetic process // glutamine metabolic process // nucleobase-containing small molecule interconversion // T cell proliferation // B cell proliferation // response to drug // 'de novo' CTP biosynthetic process // small molecule metabolic process // nucleobase-containing small molecule metabolic process // immu…	GO:0005829 // GO:0016020	cytosol // membrane	GO:0003883 // GO:0003883 // GO:0003883 // GO:0003883 // GO:0005524 // GO:0000166 // GO:0003883 // GO:0003883 // GO:0003883 // GO:0016874	CTP synthase activity // CTP synthase activity // CTP synthase activity // CTP synthase activity // ATP binding // nucleotide binding // CTP synthase activity // CTP synthase activity // CTP synthase activity // ligase activity	---	---
TC0100007991.hg.1	44.7041	37.3017	FOXO6	1p34.2	NM_001291281	RefSeq	Homo sapiens forkhead box O6 (FOXO6), mRNA.	FALSE	---	chr1	+	41361922	41383591	A6NCE0	GO:0006351 // GO:0006357 // GO:0006357 // GO:0009653 // GO:0030154 // GO:0060999	transcription, DNA-templated // regulation of transcription from RNA polymerase II promoter // regulation of transcription from RNA polymerase II promoter // anatomical structure morphogenesis // cell differentiation // positive regulation of dendritic spine development	GO:0005634 // GO:0005634 // GO:0005737	nucleus // nucleus // cytoplasm	GO:0000981 // GO:0000981 // GO:0005515 // GO:0043565	RNA polymerase II transcription factor activity, sequence-specific DNA binding // RNA polymerase II transcription factor activity, sequence-specific DNA binding // protein binding // sequence-specific DNA binding	---	---
TC0100008012.hg.1	20.8708	18.9131	GUCA2B	1p34-p33	NM_007102	RefSeq	Homo sapiens guanylate cyclase activator 2B (uroguanylin) (GUCA2B), mRNA.	FALSE	Hs.32966	chr1	+	42153421	42155824	Q16661	GO:0006182 // GO:0007588 // GO:0007589 // GO:0031284 // GO:0031284 // GO:0045776 // GO:0007588 // GO:0030802	cGMP biosynthetic process // excretion // body fluid secretion // positive regulation of guanylate cyclase activity // positive regulation of guanylate cyclase activity // negative regulation of blood pressure // excretion // regulation of cyclic nucleotide biosynthetic process	GO:0001750 // GO:0070062 // GO:0005576	photoreceptor outer segment // extracellular exosome // extracellular region	GO:0008048 // GO:0030250	calcium sensitive guanylate cyclase activator activity // guanylate cyclase activator activity	GenMAPP	Smooth_muscle_contraction
TC0100008017.hg.1	19.7398	20.6642	RIMKLA	1p34.2	NM_173642	RefSeq	Homo sapiens ribosomal modification protein rimK-like family member A (RIMKLA), mRNA.	FALSE	Hs.420244	chr1	+	42380795	42424229	Q8IXN7	GO:0006464	cellular protein modification process	GO:0005737	cytoplasm	GO:0005524 // GO:0046872 // GO:0072590 // GO:0000166 // GO:0003824 // GO:0016874 // GO:0072590	ATP binding // metal ion binding // N-acetyl-L-aspartate-L-glutamate ligase activity // nucleotide binding // catalytic activity // ligase activity // N-acetyl-L-aspartate-L-glutamate ligase activity	---	---
TC0100008023.hg.1	717.759	724.264	PPIH	1p34.1	NM_006347	RefSeq	Homo sapiens peptidylprolyl isomerase H (cyclophilin H) (PPIH), mRNA.	FALSE	Hs.256639	chr1	+	42658377	42676758	O43447	GO:0000398 // GO:0000413 // GO:0006457 // GO:0006461 // GO:0045070 // GO:0000413 // GO:0000413 // GO:0006397 // GO:0006457 // GO:0008380	mRNA splicing, via spliceosome // protein peptidyl-prolyl isomerization // protein folding // protein complex assembly // positive regulation of viral genome replication // protein peptidyl-prolyl isomerization // protein peptidyl-prolyl isomerization // mRNA processing // protein folding // RNA splicing	GO:0005681 // GO:0005737 // GO:0016607 // GO:0046540 // GO:0071001 // GO:0005634 // GO:0005681 // GO:0005737 // GO:0016607	spliceosomal complex // cytoplasm // nuclear speck // U4/U6 x U5 tri-snRNP complex // U4/U6 snRNP // nucleus // spliceosomal complex // cytoplasm // nuclear speck	GO:0003755 // GO:0005515 // GO:0016018 // GO:0043021 // GO:0003755 // GO:0016853	peptidyl-prolyl cis-trans isomerase activity // protein binding // cyclosporin A binding // ribonucleoprotein complex binding // peptidyl-prolyl cis-trans isomerase activity // isomerase activity	---	---
TC0100008025.hg.1	54732.7	56221.8	YBX1	1p34	NM_004559	RefSeq	Homo sapiens Y box binding protein 1 (YBX1), transcript variant 1, mRNA.	FALSE	Hs.473583	chr1	+	42682395	42702362	P67809	GO:0000122 // GO:0000398 // GO:0001701 // GO:0006355 // GO:0006366 // GO:0008380 // GO:0010467 // GO:0045944 // GO:0051154 // GO:0051781 // GO:0070934 // GO:0006351 // GO:0006355 // GO:0006397 // GO:0008380	negative regulation of transcription from RNA polymerase II promoter // mRNA splicing, via spliceosome // in utero embryonic development // regulation of transcription, DNA-templated // transcription from RNA polymerase II promoter // RNA splicing // gene expression // positive regulation of transcription from RNA polymerase II promoter // negative regulation of striated muscle cell differentiati…	GO:0005634 // GO:0005654 // GO:0005689 // GO:0005737 // GO:0010494 // GO:0030529 // GO:0031965 // GO:0043231 // GO:0070062 // GO:0070937 // GO:0071204 // GO:0005576 // GO:0005634 // GO:0005737 // GO:0071204	nucleus // nucleoplasm // U12-type spliceosomal complex // cytoplasm // cytoplasmic stress granule // ribonucleoprotein complex // nuclear membrane // intracellular membrane-bounded organelle // extracellular exosome // CRD-mediated mRNA stability complex // histone pre-mRNA 3'end processing complex // extracellular region // nucleus // cytoplasm // histone pre-mRNA 3'end processing complex	GO:0000978 // GO:0001077 // GO:0003677 // GO:0003677 // GO:0003682 // GO:0003690 // GO:0003697 // GO:0003700 // GO:0003723 // GO:0005515 // GO:0044822 // GO:0051020 // GO:0003676 // GO:0003677 // GO:0003697 // GO:0003723	RNA polymerase II core promoter proximal region sequence-specific DNA binding // transcriptional activator activity, RNA polymerase II core promoter proximal region sequence-specific binding // DNA binding // DNA binding // chromatin binding // double-stranded DNA binding // single-stranded DNA binding // transcription factor activity, sequence-specific DNA binding // RNA binding // protein bindi…	---	---
TC0100008026.hg.1	497.404	441.022	YBX1	---	hsa_circ_0092362	circbase	Zhang2013 ALT_ACCEPTOR, ALT_DONOR, coding, INTERNAL, intronic best transcript NM_004559	FALSE	---	chr1	+	42696409	42696608	---	---	---	---	---	---	---	---	---
TC0100008033.hg.1	53.1262	74.0306	ERMAP	1p34.2	NM_001017922	RefSeq	Homo sapiens erythroblast membrane-associated protein (Scianna blood group) (ERMAP), transcript variant 1, mRNA.	FALSE	Hs.439437	chr1	+	42817105	42844989	Q96PL5	---	---	GO:0005886 // GO:0016021 // GO:0031410 // GO:0005737 // GO:0005886 // GO:0016020	plasma membrane // integral component of membrane // cytoplasmic vesicle // cytoplasm // plasma membrane // membrane	---	---	---	---
TC0100008034.hg.1	30.831	33.3092	ZNF691	1p34.2	NM_001242739	RefSeq	Homo sapiens zinc finger protein 691 (ZNF691), transcript variant 1, mRNA.	FALSE	Hs.20879 // Hs.745530	chr1	+	42846573	42852477	Q5VV52	GO:0006355 // GO:0006355	regulation of transcription, DNA-templated // regulation of transcription, DNA-templated	GO:0005654 // GO:0005634 // GO:0005654	nucleoplasm // nucleus // nucleoplasm	GO:0000977 // GO:0003700 // GO:0046872 // GO:0000977 // GO:0003676 // GO:0003677 // GO:0003700	RNA polymerase II regulatory region sequence-specific DNA binding // transcription factor activity, sequence-specific DNA binding // metal ion binding // RNA polymerase II regulatory region sequence-specific DNA binding // nucleic acid binding // DNA binding // transcription factor activity, sequence-specific DNA binding	---	---
TC0100008052.hg.1	8.75949	10.1013	CFAP57	1p34.2	NM_001167965	RefSeq	Homo sapiens cilia and flagella associated protein 57 (CFAP57), transcript variant 3, mRNA.	FALSE	Hs.527565	chr1	+	43172149	43254358	Q96MR6	---	---	---	---	---	---	---	---
TC0100008054.hg.1	26.0787	30.3054	TMEM125	1p34.2	NM_144626	RefSeq	Homo sapiens transmembrane protein 125 (TMEM125), mRNA.	FALSE	Hs.104476	chr1	+	43269994	43274002	Q96AQ2	GO:0008150	biological_process	GO:0016021 // GO:0005575 // GO:0016020	integral component of membrane // cellular_component // membrane	GO:0003674	molecular_function	---	---
TC0100008055.hg.1	141.6	141.171	TIE1	1p34-p33	NM_001253357	RefSeq	Homo sapiens tyrosine kinase with immunoglobulin-like and EGF-like domains 1 (TIE1), transcript variant 2, mRNA.	FALSE	Hs.78824	chr1	+	43300895	43323110	P35590	GO:0001525 // GO:0001570 // GO:0001701 // GO:0007165 // GO:0007498 // GO:0016525 // GO:0018108 // GO:0018108 // GO:0030336 // GO:0032526 // GO:0045026 // GO:0001568 // GO:0006468 // GO:0016310	angiogenesis // vasculogenesis // in utero embryonic development // signal transduction // mesoderm development // negative regulation of angiogenesis // peptidyl-tyrosine phosphorylation // peptidyl-tyrosine phosphorylation // negative regulation of cell migration // response to retinoic acid // plasma membrane fusion // blood vessel development // protein phosphorylation // phosphorylation	GO:0005887 // GO:0005886 // GO:0016020 // GO:0016021	integral component of plasma membrane // plasma membrane // membrane // integral component of membrane	GO:0004714 // GO:0005515 // GO:0005524 // GO:0000166 // GO:0004672 // GO:0004713 // GO:0004714 // GO:0016301 // GO:0016740	transmembrane receptor protein tyrosine kinase activity // protein binding // ATP binding // nucleotide binding // protein kinase activity // protein tyrosine kinase activity // transmembrane receptor protein tyrosine kinase activity // kinase activity // transferase activity	---	---
TC0100008056.hg.1	8.12686	7.38748	MPL	1p34	NM_005373	RefSeq	Homo sapiens MPL proto-oncogene, thrombopoietin receptor (MPL), mRNA.	FALSE	Hs.82906	chr1	+	43337804	43354464	P40238	GO:0007166 // GO:0007596 // GO:0008283 // GO:0010628 // GO:0030168 // GO:0030220 // GO:0032642 // GO:0038163 // GO:0043066 // GO:0048872 // GO:0060216 // GO:0072091 // GO:2000035 // GO:0019221	cell surface receptor signaling pathway // blood coagulation // cell proliferation // positive regulation of gene expression // platelet activation // platelet formation // regulation of chemokine production // thrombopoietin-mediated signaling pathway // negative regulation of apoptotic process // homeostasis of number of cells // definitive hemopoiesis // regulation of stem cell proliferation /…	GO:0005794 // GO:0005886 // GO:0005886 // GO:0005887 // GO:0009986 // GO:0005794 // GO:0005886 // GO:0009986 // GO:0016020 // GO:0016021	Golgi apparatus // plasma membrane // plasma membrane // integral component of plasma membrane // cell surface // Golgi apparatus // plasma membrane // cell surface // membrane // integral component of membrane	GO:0004888 // GO:0005515 // GO:0038164 // GO:0004896	transmembrane signaling receptor activity // protein binding // thrombopoietin receptor activity // cytokine receptor activity	GenMAPP	Cell_cycle_KEGG
TC0100008057.hg.1	5240.37	5485.74	CDC20	1p34.1	NM_001255	RefSeq	Homo sapiens cell division cycle 20 (CDC20), mRNA.	FALSE	Hs.524947	chr1	+	43358955	43363203	Q12834	GO:0000278 // GO:0007049 // GO:0007067 // GO:0007094 // GO:0007264 // GO:0008284 // GO:0016567 // GO:0031145 // GO:0031145 // GO:0031915 // GO:0040020 // GO:0050773 // GO:0051301 // GO:0051436 // GO:0051437 // GO:0051439 // GO:0051488 // GO:0090129 // GO:0007049 // GO:0007399 // GO:0030154 // GO:0031915 // GO:0090129	mitotic cell cycle // cell cycle // mitotic nuclear division // mitotic spindle assembly checkpoint // small GTPase mediated signal transduction // positive regulation of cell proliferation // protein ubiquitination // anaphase-promoting complex-dependent proteasomal ubiquitin-dependent protein catabolic process // anaphase-promoting complex-dependent proteasomal ubiquitin-dependent protein catab…	GO:0000922 // GO:0005634 // GO:0005654 // GO:0005654 // GO:0005680 // GO:0005737 // GO:0005813 // GO:0005819 // GO:0005829 // GO:0048471 // GO:0005737 // GO:0005815 // GO:0005856 // GO:0043234	spindle pole // nucleus // nucleoplasm // nucleoplasm // anaphase-promoting complex // cytoplasm // centrosome // spindle // cytosol // perinuclear region of cytoplasm // cytoplasm // microtubule organizing center // cytoskeleton // protein complex	GO:0005515 // GO:0008022 // GO:0019899 // GO:0042826	protein binding // protein C-terminus binding // enzyme binding // histone deacetylase binding	GenMAPP	Cell_cycle_KEGG
TC0100008061.hg.1	2161.84	2288.29	SZT2	1p34.2	NM_015284	RefSeq	Homo sapiens seizure threshold 2 homolog (mouse) (SZT2), mRNA.	FALSE	Hs.643560	chr1	+	43389882	43456995	Q5T011	GO:0007417 // GO:0009791 // GO:0021540 // GO:0043473 // GO:1901668 // GO:0007417 // GO:0009791 // GO:1901668	central nervous system development // post-embryonic development // corpus callosum morphogenesis // pigmentation // regulation of superoxide dismutase activity // central nervous system development // post-embryonic development // regulation of superoxide dismutase activity	GO:0005777 // GO:0005777 // GO:0070062 // GO:0005777 // GO:0005777	peroxisome // peroxisome // extracellular exosome // peroxisome // peroxisome	GO:0005515 // GO:0003674	protein binding // molecular_function	---	---
TC0100008066.hg.1	37.2015	40.8351	PTPRF	1p34	NM_002840	RefSeq	Homo sapiens protein tyrosine phosphatase, receptor type, F (PTPRF), transcript variant 1, mRNA.	FALSE	Hs.272062	chr1	+	43525187	43623672	P10586	GO:0007155 // GO:0007185 // GO:0016477 // GO:0031102 // GO:0035335 // GO:0048679 // GO:1900121 // GO:0006470 // GO:0007155 // GO:0010975 // GO:0016311 // GO:0035335	cell adhesion // transmembrane receptor protein tyrosine phosphatase signaling pathway // cell migration // neuron projection regeneration // peptidyl-tyrosine dephosphorylation // regulation of axon regeneration // negative regulation of receptor binding // protein dephosphorylation // cell adhesion // regulation of neuron projection development // dephosphorylation // peptidyl-tyrosine dephosph…	GO:0005887 // GO:0043005 // GO:0043025 // GO:0070062 // GO:0016020 // GO:0016021	integral component of plasma membrane // neuron projection // neuronal cell body // extracellular exosome // membrane // integral component of membrane	GO:0004725 // GO:0004725 // GO:0005001 // GO:0008201 // GO:0032403 // GO:0035373 // GO:0004721 // GO:0004725 // GO:0016787 // GO:0016791	protein tyrosine phosphatase activity // protein tyrosine phosphatase activity // transmembrane receptor protein tyrosine phosphatase activity // heparin binding // protein complex binding // chondroitin sulfate proteoglycan binding // phosphoprotein phosphatase activity // protein tyrosine phosphatase activity // hydrolase activity // phosphatase activity	---	---
TC0100008073.hg.1	492.056	509.707	KDM4A	1p34.1	NM_014663	RefSeq	Homo sapiens lysine (K)-specific demethylase 4A (KDM4A), mRNA.	FALSE	Hs.155983	chr1	+	43650126	43705518	O75164	GO:0006281 // GO:0006302 // GO:0006325 // GO:0006351 // GO:0010507 // GO:0010629 // GO:0014898 // GO:0016032 // GO:0016577 // GO:0045892 // GO:0055114 // GO:0070544 // GO:0006355 // GO:0016568	DNA repair // double-strand break repair // chromatin organization // transcription, DNA-templated // negative regulation of autophagy // negative regulation of gene expression // cardiac muscle hypertrophy in response to stress // viral process // histone demethylation // negative regulation of transcription, DNA-templated // oxidation-reduction process // histone H3-K36 demethylation // regulat…	GO:0005634 // GO:0005654 // GO:0005730 // GO:0005737 // GO:0005634	nucleus // nucleoplasm // nucleolus // cytoplasm // nucleus	GO:0005515 // GO:0008270 // GO:0031625 // GO:0035064 // GO:0051864 // GO:0016491 // GO:0032452 // GO:0046872 // GO:0051213	protein binding // zinc ion binding // ubiquitin protein ligase binding // methylated histone binding // histone demethylase activity (H3-K36 specific) // oxidoreductase activity // histone demethylase activity // metal ion binding // dioxygenase activity	---	---
TC0100008075.hg.1	427.873	589.438	ST3GAL3	1p34.1	NM_001270459	RefSeq	Homo sapiens ST3 beta-galactoside alpha-2,3-sialyltransferase 3 (ST3GAL3), transcript variant 11, mRNA.	FALSE	Hs.597915	chr1	+	43705824	43931165	Q11203	GO:0001574 // GO:0005975 // GO:0006488 // GO:0006493 // GO:0009311 // GO:0016266 // GO:0018146 // GO:0018279 // GO:0030203 // GO:0042339 // GO:0043687 // GO:0044267 // GO:0044281 // GO:0097503 // GO:0097503 // GO:0097503 // GO:0001574 // GO:0006486 // GO:0009311 // GO:0097503	ganglioside biosynthetic process // carbohydrate metabolic process // dolichol-linked oligosaccharide biosynthetic process // protein O-linked glycosylation // oligosaccharide metabolic process // O-glycan processing // keratan sulfate biosynthetic process // protein N-linked glycosylation via asparagine // glycosaminoglycan metabolic process // keratan sulfate metabolic process // post-translati…	GO:0000139 // GO:0005576 // GO:0030173 // GO:0032580 // GO:0005794 // GO:0016020 // GO:0016021	Golgi membrane // extracellular region // integral component of Golgi membrane // Golgi cisterna membrane // Golgi apparatus // membrane // integral component of membrane	GO:0003836 // GO:0008118 // GO:0003836 // GO:0003836 // GO:0008118 // GO:0008373 // GO:0016740 // GO:0016757	beta-galactoside (CMP) alpha-2,3-sialyltransferase activity // N-acetyllactosaminide alpha-2,3-sialyltransferase activity // beta-galactoside (CMP) alpha-2,3-sialyltransferase activity // beta-galactoside (CMP) alpha-2,3-sialyltransferase activity // N-acetyllactosaminide alpha-2,3-sialyltransferase activity // sialyltransferase activity // transferase activity // transferase activity, transferri…	---	---
TC0100008078.hg.1	91.0973	82.3682	ARTN	1p34.1	NM_001136215	RefSeq	Homo sapiens artemin (ARTN), transcript variant 5, mRNA.	FALSE	Hs.632404	chr1	+	43933320	43937241	Q5T4W7	GO:0007165 // GO:0007405 // GO:0007411 // GO:0007422 // GO:0050930 // GO:0061146 // GO:0097021 // GO:0007411	signal transduction // neuroblast proliferation // axon guidance // peripheral nervous system development // induction of positive chemotaxis // Peyer's patch morphogenesis // lymphocyte migration into lymphoid organs // axon guidance	GO:0005615 // GO:0005576	extracellular space // extracellular region	GO:0005102 // GO:0008083 // GO:0005102	receptor binding // growth factor activity // receptor binding	---	---
TC0100008079.hg.1	298.8	403.897	IPO13	1p34.1	NM_014652	RefSeq	Homo sapiens importin 13 (IPO13), mRNA.	FALSE	Hs.158497	chr1	+	43946806	43968022	O94829	GO:0006606 // GO:0006810 // GO:0006886 // GO:0015031	protein import into nucleus // transport // intracellular protein transport // protein transport	GO:0005737 // GO:0031965 // GO:0005634 // GO:0005737 // GO:0005737 // GO:0031965 // GO:0005622	cytoplasm // nuclear membrane // nucleus // cytoplasm // cytoplasm // nuclear membrane // intracellular	GO:0005515 // GO:0008139 // GO:0008536 // GO:0008565 // GO:0008139 // GO:0008565	protein binding // nuclear localization sequence binding // Ran GTPase binding // protein transporter activity // nuclear localization sequence binding // protein transporter activity	---	---
TC0100008080.hg.1	862.078	829.051	DPH2	1p34	NM_001039589	RefSeq	Homo sapiens DPH2 homolog (DPH2), transcript variant 2, mRNA.	FALSE	Hs.632398	chr1	+	43969981	43973373	Q9BQC3	GO:0017183 // GO:0017183 // GO:0017183 // GO:0043687 // GO:0044267 // GO:0017183	peptidyl-diphthamide biosynthetic process from peptidyl-histidine // peptidyl-diphthamide biosynthetic process from peptidyl-histidine // peptidyl-diphthamide biosynthetic process from peptidyl-histidine // post-translational protein modification // cellular protein metabolic process // peptidyl-diphthamide biosynthetic process from peptidyl-histidine	GO:0005829	cytosol	GO:0005515 // GO:0090560 // GO:0090560	protein binding // 2-(3-amino-3-carboxypropyl)histidine synthase activity // 2-(3-amino-3-carboxypropyl)histidine synthase activity	---	---
TC0100008081.hg.1	2791.31	3043.45	ATP6V0B	1p32.3	NM_001039457	RefSeq	Homo sapiens ATPase, H+ transporting, lysosomal 21kDa, V0 subunit b (ATP6V0B), transcript variant 2, mRNA.	FALSE	Hs.596514	chr1	+	43974487	43978300	Q99437	GO:0006879 // GO:0007035 // GO:0008286 // GO:0015991 // GO:0015992 // GO:0033572 // GO:0034220 // GO:0055085 // GO:0090382 // GO:0006810 // GO:0006811 // GO:0007035 // GO:0015992	cellular iron ion homeostasis // vacuolar acidification // insulin receptor signaling pathway // ATP hydrolysis coupled proton transport // proton transport // transferrin transport // ion transmembrane transport // transmembrane transport // phagosome maturation // transport // ion transport // vacuolar acidification // proton transport	GO:0000220 // GO:0010008 // GO:0016021 // GO:0030670 // GO:0000220 // GO:0005773 // GO:0005774 // GO:0016020 // GO:0016021 // GO:0033177 // GO:0033179	vacuolar proton-transporting V-type ATPase, V0 domain // endosome membrane // integral component of membrane // phagocytic vesicle membrane // vacuolar proton-transporting V-type ATPase, V0 domain // vacuole // vacuolar membrane // membrane // integral component of membrane // proton-transporting two-sector ATPase complex, proton-transporting domain // proton-transporting V-type ATPase, V0 domain	GO:0005215 // GO:0046961 // GO:0015078 // GO:0046961	transporter activity // proton-transporting ATPase activity, rotational mechanism // hydrogen ion transmembrane transporter activity // proton-transporting ATPase activity, rotational mechanism	---	---
TC0100008082.hg.1	679.313	899.447	B4GALT2	1p34-p33	NM_001005417	RefSeq	Homo sapiens UDP-Gal:betaGlcNAc beta 1,4- galactosyltransferase, polypeptide 2 (B4GALT2), transcript variant 3, mRNA.	FALSE	Hs.632403	chr1	+	43978943	43991171	O60909	GO:0005975 // GO:0018146 // GO:0018279 // GO:0030203 // GO:0042339 // GO:0043687 // GO:0044267 // GO:0044281 // GO:0005975 // GO:0006486	carbohydrate metabolic process // keratan sulfate biosynthetic process // protein N-linked glycosylation via asparagine // glycosaminoglycan metabolic process // keratan sulfate metabolic process // post-translational protein modification // cellular protein metabolic process // small molecule metabolic process // carbohydrate metabolic process // protein glycosylation	GO:0000139 // GO:0016021 // GO:0032580 // GO:0005794 // GO:0016020	Golgi membrane // integral component of membrane // Golgi cisterna membrane // Golgi apparatus // membrane	GO:0003831 // GO:0003945 // GO:0004461 // GO:0008378 // GO:0046872 // GO:0016740 // GO:0016757	beta-N-acetylglucosaminylglycopeptide beta-1,4-galactosyltransferase activity // N-acetyllactosamine synthase activity // lactose synthase activity // galactosyltransferase activity // metal ion binding // transferase activity // transferase activity, transferring glycosyl groups	---	---
TC0100008084.hg.1	60.3438	61.8612	CCDC24	1p34.1	NM_152499	RefSeq	Homo sapiens coiled-coil domain containing 24 (CCDC24), mRNA.	FALSE	Hs.632394	chr1	+	43991359	43996528	Q8N4L8	---	---	---	---	GO:0005515	protein binding	---	---
TC0100008088.hg.1	35.3343	23.0639	KLF17	1p34.1	NM_173484	RefSeq	Homo sapiens Kruppel-like factor 17 (KLF17), mRNA.	FALSE	Hs.567674	chr1	+	44118850	44135140	Q5JT82	GO:0000122 // GO:0006351 // GO:0006357 // GO:0007276 // GO:0006355 // GO:0006357	negative regulation of transcription from RNA polymerase II promoter // transcription, DNA-templated // regulation of transcription from RNA polymerase II promoter // gamete generation // regulation of transcription, DNA-templated // regulation of transcription from RNA polymerase II promoter	GO:0005634	nucleus	GO:0000978 // GO:0001078 // GO:0003700 // GO:0005515 // GO:0044212 // GO:0046872 // GO:0003676 // GO:0003677 // GO:0003700 // GO:0044212	RNA polymerase II core promoter proximal region sequence-specific DNA binding // transcriptional repressor activity, RNA polymerase II core promoter proximal region sequence-specific binding // transcription factor activity, sequence-specific DNA binding // protein binding // transcription regulatory region DNA binding // metal ion binding // nucleic acid binding // DNA binding // transcription f…	---	---
TC0100008090.hg.1	325.702	368.471	DMAP1	1p34	NM_001034023	RefSeq	Homo sapiens DNA methyltransferase 1 associated protein 1 (DMAP1), transcript variant 2, mRNA.	FALSE	Hs.8008	chr1	+	44213453	44220681	Q9NPF5	GO:0000122 // GO:0006281 // GO:0006306 // GO:0006325 // GO:0006338 // GO:0006351 // GO:0040008 // GO:0042993 // GO:0043967 // GO:0043968 // GO:0045471 // GO:0045892 // GO:0006355 // GO:0016568 // GO:0043967 // GO:0043968 // GO:0045892 // GO:0032259	negative regulation of transcription from RNA polymerase II promoter // DNA repair // DNA methylation // chromatin organization // chromatin remodeling // transcription, DNA-templated // regulation of growth // positive regulation of transcription factor import into nucleus // histone H4 acetylation // histone H2A acetylation // response to ethanol // negative regulation of transcription, DNA-tem…	GO:0005634 // GO:0005634 // GO:0005654 // GO:0005657 // GO:0005737 // GO:0035267 // GO:0005634 // GO:0005737 // GO:0035267 // GO:0016020 // GO:0016021	nucleus // nucleus // nucleoplasm // replication fork // cytoplasm // NuA4 histone acetyltransferase complex // nucleus // cytoplasm // NuA4 histone acetyltransferase complex // membrane // integral component of membrane	GO:0001103 // GO:0003714 // GO:0005515 // GO:0003714 // GO:0003714 // GO:0008168 // GO:0016740	RNA polymerase II repressing transcription factor binding // transcription corepressor activity // protein binding // transcription corepressor activity // transcription corepressor activity // methyltransferase activity // transferase activity	---	---
TC0100008094.hg.1	11828.8	12722.2	RNF220	1p34.1	NM_018150	RefSeq	Homo sapiens ring finger protein 220 (RNF220), mRNA.	FALSE	Hs.456557	chr1	+	44405194	44651724	Q5VTB9	GO:0016567 // GO:0051865 // GO:0090263 // GO:0016567 // GO:0051865 // GO:0090263	protein ubiquitination // protein autoubiquitination // positive regulation of canonical Wnt signaling pathway // protein ubiquitination // protein autoubiquitination // positive regulation of canonical Wnt signaling pathway	GO:0005737 // GO:0005737	cytoplasm // cytoplasm	GO:0004842 // GO:0005515 // GO:0008270 // GO:0016874 // GO:0061630 // GO:0004842 // GO:0046872	ubiquitin-protein transferase activity // protein binding // zinc ion binding // ligase activity // ubiquitin protein ligase activity // ubiquitin-protein transferase activity // metal ion binding	---	---
TC0100008100.hg.1	38.5044	47.6137	C1orf228	1p34.1	NM_001145636	RefSeq	Homo sapiens chromosome 1 open reading frame 228 (C1orf228), mRNA.	FALSE	Hs.173679	chr1	+	44674692	44725591	Q6PIY5	---	---	---	---	---	---	---	---
TC0100008101.hg.1	4266.81	3983.53	KIF2C	1p34.1	NM_001297655	RefSeq	Homo sapiens kinesin family member 2C (KIF2C), transcript variant 2, mRNA.	FALSE	Hs.720061	chr1	+	44739818	44767767	Q99661	GO:0000278 // GO:0007018 // GO:0007018 // GO:0007019 // GO:0007019 // GO:0007067 // GO:0007080 // GO:0007264 // GO:0007596 // GO:0008152 // GO:0008283 // GO:0019886 // GO:0030951 // GO:0051301 // GO:0051983 // GO:0007018 // GO:0007018 // GO:0007049 // GO:0007059 // GO:0007067	mitotic cell cycle // microtubule-based movement // microtubule-based movement // microtubule depolymerization // microtubule depolymerization // mitotic nuclear division // mitotic metaphase plate congression // small GTPase mediated signal transduction // blood coagulation // metabolic process // cell proliferation // antigen processing and presentation of exogenous peptide antigen via MHC clas…	GO:0000775 // GO:0000776 // GO:0000777 // GO:0005634 // GO:0005829 // GO:0005871 // GO:0005881 // GO:0015630 // GO:0016020 // GO:0035371 // GO:0000775 // GO:0000776 // GO:0005694 // GO:0005737 // GO:0005856 // GO:0005871 // GO:0005874	chromosome, centromeric region // kinetochore // condensed chromosome kinetochore // nucleus // cytosol // kinesin complex // cytoplasmic microtubule // microtubule cytoskeleton // membrane // microtubule plus-end // chromosome, centromeric region // kinetochore // chromosome // cytoplasm // cytoskeleton // kinesin complex // microtubule	GO:0003777 // GO:0005515 // GO:0005524 // GO:0016887 // GO:0019237 // GO:0051010 // GO:0000166 // GO:0003777 // GO:0008017 // GO:0016887	microtubule motor activity // protein binding // ATP binding // ATPase activity // centromeric DNA binding // microtubule plus-end binding // nucleotide binding // microtubule motor activity // microtubule binding // ATPase activity	---	---
TC0100008102.hg.1	855.834	496.296	KIF2C	---	hsa_circ_0006145	circbase	Jeck2013 ALT_DONOR, coding, INTERNAL, intronic best transcript NM_006845	FALSE	---	chr1	+	44753255	44753690	---	---	---	---	---	---	---	---	---
TC0100008103.hg.1	22473.1	24706.8	RPS8	1p34.1-p32	NM_001012	RefSeq	Homo sapiens ribosomal protein S8 (RPS8), mRNA.	FALSE	Hs.512675	chr1	+	44775251	44778779	P62241	GO:0000184 // GO:0000462 // GO:0006412 // GO:0006412 // GO:0006412 // GO:0006413 // GO:0006414 // GO:0006415 // GO:0006614 // GO:0010467 // GO:0016032 // GO:0019058 // GO:0019083 // GO:0044267 // GO:0000462 // GO:0006412	nuclear-transcribed mRNA catabolic process, nonsense-mediated decay // maturation of SSU-rRNA from tricistronic rRNA transcript (SSU-rRNA, 5.8S rRNA, LSU-rRNA) // translation // translation // translation // translational initiation // translational elongation // translational termination // SRP-dependent cotranslational protein targeting to membrane // gene expression // viral process // viral l…	GO:0005634 // GO:0005737 // GO:0005829 // GO:0005925 // GO:0016020 // GO:0022627 // GO:0022627 // GO:0030529 // GO:0070062 // GO:0005622 // GO:0005737 // GO:0005840 // GO:0016020 // GO:0030529	nucleus // cytoplasm // cytosol // focal adhesion // membrane // cytosolic small ribosomal subunit // cytosolic small ribosomal subunit // ribonucleoprotein complex // extracellular exosome // intracellular // cytoplasm // ribosome // membrane // ribonucleoprotein complex	GO:0003735 // GO:0044822 // GO:0003735 // GO:0003735	structural constituent of ribosome // poly(A) RNA binding // structural constituent of ribosome // structural constituent of ribosome	GenMAPP // GenMAPP // GenMAPP	Ribosomal_Proteins // Ribosomal_Proteins // Ribosomal_Proteins
TC0100008105.hg.1	111.358	129.656	PLK3	1p34.1	NM_004073	RefSeq	Homo sapiens polo-like kinase 3 (PLK3), mRNA.	FALSE	Hs.632415	chr1	+	44800225	44805995	Q9H4B4	GO:0000082 // GO:0000086 // GO:0000122 // GO:0000302 // GO:0006468 // GO:0006915 // GO:0006970 // GO:0006974 // GO:0006974 // GO:0007093 // GO:0007113 // GO:0009314 // GO:0031122 // GO:0032465 // GO:0032465 // GO:0043066 // GO:0043491 // GO:0044819 // GO:0051302 // GO:0090166 // GO:0090316 // GO:2000777 // GO:0006468 // GO:0006915 // GO:0006974 // GO:0007049 // GO:0016310	G1/S transition of mitotic cell cycle // G2/M transition of mitotic cell cycle // negative regulation of transcription from RNA polymerase II promoter // response to reactive oxygen species // protein phosphorylation // apoptotic process // response to osmotic stress // cellular response to DNA damage stimulus // cellular response to DNA damage stimulus // mitotic cell cycle checkpoint // endomit…	GO:0000785 // GO:0005634 // GO:0005730 // GO:0005737 // GO:0005795 // GO:0005813 // GO:0030425 // GO:0043025 // GO:0005634 // GO:0005730 // GO:0005737 // GO:0005794 // GO:0005815 // GO:0005856	chromatin // nucleus // nucleolus // cytoplasm // Golgi stack // centrosome // dendrite // neuronal cell body // nucleus // nucleolus // cytoplasm // Golgi apparatus // microtubule organizing center // cytoskeleton	GO:0002039 // GO:0004674 // GO:0005515 // GO:0005524 // GO:0000166 // GO:0004672 // GO:0004674 // GO:0004674 // GO:0016301 // GO:0016740	p53 binding // protein serine/threonine kinase activity // protein binding // ATP binding // nucleotide binding // protein kinase activity // protein serine/threonine kinase activity // protein serine/threonine kinase activity // kinase activity // transferase activity	---	---
TC0100008106.hg.1	37.0799	39.2849	BTBD19	1p34.1	NM_001136537	RefSeq	Homo sapiens BTB (POZ) domain containing 19 (BTBD19), mRNA.	FALSE	Hs.632400	chr1	+	44808482	44815585	C9JJ37	---	---	---	---	---	---	---	---
TC0100008114.hg.1	2914.73	3278.99	UROD	1p34	NM_000374	RefSeq	Homo sapiens uroporphyrinogen decarboxylase (UROD), transcript variant 1, mRNA.	FALSE	Hs.78601	chr1	+	45012133	45015669	P06132	GO:0001889 // GO:0006778 // GO:0006782 // GO:0006783 // GO:0006783 // GO:0006783 // GO:0010039 // GO:0014075 // GO:0032355 // GO:0044281 // GO:0045471 // GO:0046502 // GO:0046689 // GO:0051597 // GO:0060992 // GO:0071243 // GO:0006779 // GO:0006783 // GO:0006783 // GO:0014070 // GO:0042168	liver development // porphyrin-containing compound metabolic process // protoporphyrinogen IX biosynthetic process // heme biosynthetic process // heme biosynthetic process // heme biosynthetic process // response to iron ion // response to amine // response to estradiol // small molecule metabolic process // response to ethanol // uroporphyrinogen III metabolic process // response to mercury ion…	GO:0005654 // GO:0005737 // GO:0005829 // GO:0005829 // GO:0005737 // GO:0005829 // GO:0005829	nucleoplasm // cytoplasm // cytosol // cytosol // cytoplasm // cytosol // cytosol	GO:0004853 // GO:0004853 // GO:0005515 // GO:0008198 // GO:0004853 // GO:0016829 // GO:0016831	uroporphyrinogen decarboxylase activity // uroporphyrinogen decarboxylase activity // protein binding // ferrous iron binding // uroporphyrinogen decarboxylase activity // lyase activity // carboxy-lyase activity	GenMAPP // HumanCyc	Heme_Biosynthesis // HEME-BIOSYNTHESIS-II
TC0100008120.hg.1	33.9564	19.473	HPDL	1p34.1	NM_032756	RefSeq	Homo sapiens 4-hydroxyphenylpyruvate dioxygenase-like (HPDL), mRNA.	FALSE	Hs.162717	chr1	+	45326873	45328674	Q96IR7	GO:0009072 // GO:0055114	aromatic amino acid family metabolic process // oxidation-reduction process	---	---	GO:0003868 // GO:0046872 // GO:0016491 // GO:0016701 // GO:0051213	4-hydroxyphenylpyruvate dioxygenase activity // metal ion binding // oxidoreductase activity // oxidoreductase activity, acting on single donors with incorporation of molecular oxygen // dioxygenase activity	---	---
TC0100008121.hg.1	1434.06	1362.89	TOE1	1p33	NM_025077	RefSeq	Homo sapiens target of EGR1, member 1 (nuclear) (TOE1), mRNA.	FALSE	Hs.525091	chr1	+	45339670	45343978	Q96GM8	GO:0090503	RNA phosphodiester bond hydrolysis, exonucleolytic	GO:0005634 // GO:0005654 // GO:0005730 // GO:0005737 // GO:0015030 // GO:0016607 // GO:0005634	nucleus // nucleoplasm // nucleolus // cytoplasm // Cajal body // nuclear speck // nucleus	GO:0000175 // GO:0003676 // GO:0004535 // GO:0005515 // GO:0046872	3'-5'-exoribonuclease activity // nucleic acid binding // poly(A)-specific ribonuclease activity // protein binding // metal ion binding	---	---
TC0100008124.hg.1	184.606	157.192	MMACHC	1p34.1	NM_015506	RefSeq	Homo sapiens methylmalonic aciduria (cobalamin deficiency) cblC type, with homocystinuria (MMACHC), mRNA.	FALSE	Hs.13024	chr1	+	45500053	45513382	Q9Y4U1	GO:0006766 // GO:0006767 // GO:0009235 // GO:0009235 // GO:0009236 // GO:0044281	vitamin metabolic process // water-soluble vitamin metabolic process // cobalamin metabolic process // cobalamin metabolic process // cobalamin biosynthetic process // small molecule metabolic process	GO:0005739 // GO:0005829 // GO:0005737	mitochondrion // cytosol // cytoplasm	GO:0005515 // GO:0031419	protein binding // cobalamin binding	---	---
TC0100008126.hg.1	913.861	1172.51	AKR1A1	1p33-p32	NM_001202413	RefSeq	Homo sapiens aldo-keto reductase family 1, member A1 (aldehyde reductase) (AKR1A1), transcript variant 4, mRNA.	FALSE	Hs.474584	chr1	+	45550543	45570051	P14550	GO:0005975 // GO:0006006 // GO:0006081 // GO:0006805 // GO:0019640 // GO:0019853 // GO:0042840 // GO:0044281 // GO:0046185 // GO:0055114 // GO:1901687	carbohydrate metabolic process // glucose metabolic process // cellular aldehyde metabolic process // xenobiotic metabolic process // glucuronate catabolic process to xylulose 5-phosphate // L-ascorbic acid biosynthetic process // D-glucuronate catabolic process // small molecule metabolic process // aldehyde catabolic process // oxidation-reduction process // glutathione derivative biosynthetic …	GO:0005615 // GO:0005829 // GO:0016324 // GO:0070062 // GO:0005829	extracellular space // cytosol // apical plasma membrane // extracellular exosome // cytosol	GO:0004032 // GO:0005515 // GO:0009055 // GO:0047939 // GO:0008106 // GO:0016491	alditol:NADP+ 1-oxidoreductase activity // protein binding // electron carrier activity // L-glucuronate reductase activity // alcohol dehydrogenase (NADP+) activity // oxidoreductase activity	---	---
TC0100008127.hg.1	9261.31	8405.15	NASP	1p34.1	NM_001195193	RefSeq	Homo sapiens nuclear autoantigenic sperm protein (histone-binding) (NASP), transcript variant 4, mRNA.	FALSE	Hs.319334	chr1	+	45583846	45618906	P49321	GO:0001824 // GO:0006260 // GO:0006334 // GO:0006335 // GO:0006336 // GO:0007049 // GO:0008283 // GO:0008584 // GO:0015031 // GO:0033574 // GO:0043486 // GO:0006260 // GO:0006810 // GO:0007049	blastocyst development // DNA replication // nucleosome assembly // DNA replication-dependent nucleosome assembly // DNA replication-independent nucleosome assembly // cell cycle // cell proliferation // male gonad development // protein transport // response to testosterone // histone exchange // DNA replication // transport // cell cycle	GO:0000790 // GO:0005634 // GO:0005654 // GO:0005737 // GO:0043234 // GO:0005634	nuclear chromatin // nucleus // nucleoplasm // cytoplasm // protein complex // nucleus	GO:0005515 // GO:0032403 // GO:0042393 // GO:0051879	protein binding // protein complex binding // histone binding // Hsp90 protein binding	---	---
TC0100008129.hg.1	170.793	97.4465	NASP	---	hsa_circ_0092340	circbase	Zhang2013 ALT_ACCEPTOR, ALT_DONOR, coding, INTERNAL, intronic best transcript NM_002482	FALSE	---	chr1	+	45613509	45613828	---	---	---	---	---	---	---	---	---
TC0100008130.hg.1	155.755	193.911	NASP	---	hsa_circ_0092293	circbase	Zhang2013 ALT_DONOR, coding, INTERNAL, intronic best transcript NM_002482	FALSE	---	chr1	+	45617592	45617791	---	---	---	---	---	---	---	---	---
TC0100008132.hg.1	536.69	625.486	TMEM69	1p34.1	NM_016486	RefSeq	Homo sapiens transmembrane protein 69 (TMEM69), mRNA.	FALSE	Hs.699548	chr1	+	45687214	45694443	Q5SWH9	---	---	GO:0016021 // GO:0016020	integral component of membrane // membrane	---	---	---	---
TC0100008139.hg.1	586.67	539.595	MAST2	1p34.1	NM_015112	RefSeq	Homo sapiens microtubule associated serine/threonine kinase 2 (MAST2), mRNA.	FALSE	Hs.319481	chr1	+	45786987	46036124	Q6P0Q8	GO:0006468 // GO:0007010 // GO:0018105 // GO:0035556 // GO:0045075 // GO:0048515 // GO:0006468 // GO:0007010 // GO:0016310 // GO:0018105 // GO:0035556 // GO:0045075	protein phosphorylation // cytoskeleton organization // peptidyl-serine phosphorylation // intracellular signal transduction // regulation of interleukin-12 biosynthetic process // spermatid differentiation // protein phosphorylation // cytoskeleton organization // phosphorylation // peptidyl-serine phosphorylation // intracellular signal transduction // regulation of interleukin-12 biosynthetic …	GO:0005737 // GO:0005886 // GO:0015630 // GO:0005737 // GO:0005856 // GO:0015630 // GO:0015630 // GO:0016020	cytoplasm // plasma membrane // microtubule cytoskeleton // cytoplasm // cytoskeleton // microtubule cytoskeleton // microtubule cytoskeleton // membrane	GO:0000287 // GO:0004674 // GO:0005515 // GO:0005524 // GO:0008017 // GO:0019902 // GO:0000166 // GO:0000287 // GO:0004672 // GO:0004674 // GO:0004674 // GO:0005524 // GO:0008017 // GO:0008017 // GO:0016301 // GO:0016740 // GO:0046872	magnesium ion binding // protein serine/threonine kinase activity // protein binding // ATP binding // microtubule binding // phosphatase binding // nucleotide binding // magnesium ion binding // protein kinase activity // protein serine/threonine kinase activity // protein serine/threonine kinase activity // ATP binding // microtubule binding // microtubule binding // kinase activity // transfer…	---	---
TC0100008145.hg.1	46.7287	37.9306	TSPAN1	1p34.1	NM_005727	RefSeq	Homo sapiens tetraspanin 1 (TSPAN1), mRNA.	FALSE	Hs.38972	chr1	+	46175073	46185962	O60635	GO:0007166 // GO:0008283 // GO:0016477 // GO:0045807 // GO:0050821 // GO:0007166	cell surface receptor signaling pathway // cell proliferation // cell migration // positive regulation of endocytosis // protein stabilization // cell surface receptor signaling pathway	GO:0005737 // GO:0005765 // GO:0005886 // GO:0005887 // GO:0016020 // GO:0031982 // GO:0048471 // GO:0070062 // GO:0005764 // GO:0005887 // GO:0016020 // GO:0016021	cytoplasm // lysosomal membrane // plasma membrane // integral component of plasma membrane // membrane // vesicle // perinuclear region of cytoplasm // extracellular exosome // lysosome // integral component of plasma membrane // membrane // integral component of membrane	GO:0005515	protein binding	---	---
TC0100008146.hg.1	102.011	64.4876	LURAP1	1p34	NM_001013615	RefSeq	Homo sapiens leucine rich adaptor protein 1 (LURAP1), mRNA.	FALSE	Hs.568642	chr1	+	46203334	46221261	Q96LR2	GO:0001819 // GO:0016477 // GO:0031032 // GO:0043123	positive regulation of cytokine production // cell migration // actomyosin structure organization // positive regulation of I-kappaB kinase/NF-kappaB signaling	GO:0005737 // GO:0042641 // GO:0005737	cytoplasm // actomyosin // cytoplasm	GO:0005515	protein binding	---	---
TC0100008150.hg.1	655.506	559.55	RAD54L	1p32	NM_001142548	RefSeq	Homo sapiens RAD54-like (S. cerevisiae) (RAD54L), transcript variant 2, mRNA.	FALSE	Hs.642042	chr1	+	46247688	46278473	Q92698	GO:0000724 // GO:0000733 // GO:0006281 // GO:0006310 // GO:0007126 // GO:0008340 // GO:0010212 // GO:0042493 // GO:0051276 // GO:0006281 // GO:0006302 // GO:0006974	double-strand break repair via homologous recombination // DNA strand renaturation // DNA repair // DNA recombination // meiotic nuclear division // determination of adult lifespan // response to ionizing radiation // response to drug // chromosome organization // DNA repair // double-strand break repair // cellular response to DNA damage stimulus	GO:0005634 // GO:0005654 // GO:0005634	nucleus // nucleoplasm // nucleus	GO:0003677 // GO:0004386 // GO:0005515 // GO:0005524 // GO:0036310 // GO:0000166 // GO:0016787	DNA binding // helicase activity // protein binding // ATP binding // annealing helicase activity // nucleotide binding // hydrolase activity	---	---
TC0100008151.hg.1	88.2421	126.406	RAD54L	---	RAD54L.iAug10-unspliced	Ace View	Transcript Identified by AceView, Entrez Gene ID(s) 8438	FALSE	---	chr1	+	46280773	46283022	---	---	---	---	---	---	---	---	---
TC0100008152.hg.1	1974.37	2188.46	UQCRH	1p34.1	NM_001297565	RefSeq	Homo sapiens ubiquinol-cytochrome c reductase hinge protein (UQCRH), transcript variant 2, mRNA.	FALSE	Hs.481571	chr1	+	46303613	46316777	P07919	GO:0006119 // GO:0006122 // GO:0009060 // GO:0022904 // GO:0044237 // GO:0044281 // GO:0055114 // GO:1902600 // GO:1902600 // GO:0055114	oxidative phosphorylation // mitochondrial electron transport, ubiquinol to cytochrome c // aerobic respiration // respiratory electron transport chain // cellular metabolic process // small molecule metabolic process // oxidation-reduction process // hydrogen ion transmembrane transport // hydrogen ion transmembrane transport // oxidation-reduction process	GO:0005739 // GO:0005743 // GO:0005746 // GO:0005739 // GO:0005743 // GO:0016020 // GO:0070469	mitochondrion // mitochondrial inner membrane // mitochondrial respiratory chain // mitochondrion // mitochondrial inner membrane // membrane // respiratory chain	GO:0005515 // GO:0008121 // GO:0008121	protein binding // ubiquinol-cytochrome-c reductase activity // ubiquinol-cytochrome-c reductase activity	GenMAPP	Electron_Transport_Chain
TC0100008156.hg.1	1274.4	1260.61	NSUN4	1p34	NM_001256127	RefSeq	Homo sapiens NOP2/Sun domain family, member 4 (NSUN4), transcript variant 2, mRNA.	FALSE	Hs.163424	chr1	+	46340177	46365152	Q96CB9	GO:0031167 // GO:0042256 // GO:0070131 // GO:0006364 // GO:0032259 // GO:0042254	rRNA methylation // mature ribosome assembly // positive regulation of mitochondrial translation // rRNA processing // methylation // ribosome biogenesis	GO:0005762 // GO:0005739	mitochondrial large ribosomal subunit // mitochondrion	GO:0005515 // GO:0008168 // GO:0070181 // GO:0003723 // GO:0008168 // GO:0016740 // GO:0019843	protein binding // methyltransferase activity // small ribosomal subunit rRNA binding // RNA binding // methyltransferase activity // transferase activity // rRNA binding	---	---
TC0100008158.hg.1	38.0299	33.9704	FAAH	1p35-p34	NM_001441	RefSeq	Homo sapiens fatty acid amide hydrolase (FAAH), mRNA.	FALSE	Hs.720143	chr1	+	46394265	46413848	O00519	GO:0009062 // GO:0019369 // GO:0044281 // GO:0009062	fatty acid catabolic process // arachidonic acid metabolic process // small molecule metabolic process // fatty acid catabolic process	GO:0005789 // GO:0005856 // GO:0016021 // GO:0031090 // GO:0005737 // GO:0012505 // GO:0016020	endoplasmic reticulum membrane // cytoskeleton // integral component of membrane // organelle membrane // cytoplasm // endomembrane system // membrane	GO:0005515 // GO:0016884 // GO:0017064 // GO:0047372 // GO:0016787 // GO:0017064	protein binding // carbon-nitrogen ligase activity, with glutamine as amido-N-donor // fatty acid amide hydrolase activity // acylglycerol lipase activity // hydrolase activity // fatty acid amide hydrolase activity	HumanCyc // MetaCyc	PWY6666-1 // PWY6666-1
TC0100008163.hg.1	21.4033	17.3268	DMBX1	1p33	NM_147192	RefSeq	Homo sapiens diencephalon/mesencephalon homeobox 1 (DMBX1), transcript variant 2, mRNA.	FALSE	Hs.375623	chr1	+	46506996	46514226	Q8NFW5	GO:0000122 // GO:0006351 // GO:0007417 // GO:0007420 // GO:0008343 // GO:0008344 // GO:0045892 // GO:0048589 // GO:0006355 // GO:0007275 // GO:0007417 // GO:0007420 // GO:0045892 // GO:0048589	negative regulation of transcription from RNA polymerase II promoter // transcription, DNA-templated // central nervous system development // brain development // adult feeding behavior // adult locomotory behavior // negative regulation of transcription, DNA-templated // developmental growth // regulation of transcription, DNA-templated // multicellular organismal development // central nervous …	GO:0005634 // GO:0005667	nucleus // transcription factor complex	GO:0000977 // GO:0001227 // GO:0003677 // GO:0003700 // GO:0042803 // GO:0043565 // GO:0046982 // GO:0003677 // GO:0003700 // GO:0043565	RNA polymerase II regulatory region sequence-specific DNA binding // transcriptional repressor activity, RNA polymerase II transcription regulatory region sequence-specific binding // DNA binding // transcription factor activity, sequence-specific DNA binding // protein homodimerization activity // sequence-specific DNA binding // protein heterodimerization activity // DNA binding // transcriptio…	---	---
TC0100008170.hg.1	27.2822	21.7262	TEX38	1p33	NM_001145474	RefSeq	Homo sapiens testis expressed 38 (TEX38), transcript variant 1, mRNA.	FALSE	Hs.443299	chr1	+	46668855	46673594	Q6PEX7	GO:0098779	mitophagy in response to mitochondrial depolarization	GO:0016021 // GO:0016020	integral component of membrane // membrane	---	---	---	---
TC0100008182.hg.1	10.5463	9.90456	CYP4X1	1p33|1	NM_178033	RefSeq	Homo sapiens cytochrome P450, family 4, subfamily X, polypeptide 1 (CYP4X1), mRNA.	FALSE	Hs.439760	chr1	+	47023568	47050751	Q8N118	GO:0055114	oxidation-reduction process	GO:0005789 // GO:0016021 // GO:0005783 // GO:0016020 // GO:0031090 // GO:0043231	endoplasmic reticulum membrane // integral component of membrane // endoplasmic reticulum // membrane // organelle membrane // intracellular membrane-bounded organelle	GO:0005506 // GO:0020037 // GO:0070330 // GO:0004497 // GO:0016491 // GO:0016705 // GO:0046872	iron ion binding // heme binding // aromatase activity // monooxygenase activity // oxidoreductase activity // oxidoreductase activity, acting on paired donors, with incorporation or reduction of molecular oxygen // metal ion binding	---	---
TC0100008183.hg.1	16.7312	19.3201	CYP4Z1	1p33	NM_178134	RefSeq	Homo sapiens cytochrome P450, family 4, subfamily Z, polypeptide 1 (CYP4Z1), mRNA.	FALSE	Hs.176588	chr1	+	47067488	47118320	Q86W10	GO:0055114	oxidation-reduction process	GO:0005789 // GO:0016021 // GO:0005783 // GO:0016020 // GO:0031090 // GO:0043231	endoplasmic reticulum membrane // integral component of membrane // endoplasmic reticulum // membrane // organelle membrane // intracellular membrane-bounded organelle	GO:0005506 // GO:0020037 // GO:0070330 // GO:0004497 // GO:0016491 // GO:0016705 // GO:0046872	iron ion binding // heme binding // aromatase activity // monooxygenase activity // oxidoreductase activity // oxidoreductase activity, acting on paired donors, with incorporation or reduction of molecular oxygen // metal ion binding	---	---
TC0100008185.hg.1	11.388	10.0869	CYP4A22	1p33	NM_001010969	RefSeq	Homo sapiens cytochrome P450, family 4, subfamily A, polypeptide 22 (CYP4A22), transcript variant 1, mRNA.	FALSE	Hs.726474	chr1	+	47137425	47149741	Q02928	GO:0055114 // GO:0001676 // GO:0003091 // GO:0003095 // GO:0006631 // GO:0006691 // GO:0006805 // GO:0019369 // GO:0019369 // GO:0019373 // GO:0032305 // GO:0036101 // GO:0044255 // GO:0044281 // GO:0055078 // GO:0055114 // GO:0097267	oxidation-reduction process // long-chain fatty acid metabolic process // renal water homeostasis // pressure natriuresis // fatty acid metabolic process // leukotriene metabolic process // xenobiotic metabolic process // arachidonic acid metabolic process // arachidonic acid metabolic process // epoxygenase P450 pathway // positive regulation of icosanoid secretion // leukotriene B4 catabolic pr…	GO:0005789 // GO:0005737 // GO:0005783 // GO:0005789 // GO:0016020 // GO:0016324 // GO:0031090 // GO:0043231 // GO:0043231 // GO:0070062 // GO:0016021	endoplasmic reticulum membrane // cytoplasm // endoplasmic reticulum // endoplasmic reticulum membrane // membrane // apical plasma membrane // organelle membrane // intracellular membrane-bounded organelle // intracellular membrane-bounded organelle // extracellular exosome // integral component of membrane	GO:0004497 // GO:0005506 // GO:0016705 // GO:0020037 // GO:0008392 // GO:0016491 // GO:0018685 // GO:0018685 // GO:0046872 // GO:0050051	monooxygenase activity // iron ion binding // oxidoreductase activity, acting on paired donors, with incorporation or reduction of molecular oxygen // heme binding // arachidonic acid epoxygenase activity // oxidoreductase activity // alkane 1-monooxygenase activity // alkane 1-monooxygenase activity // metal ion binding // leukotriene-B4 20-monooxygenase activity	---	---
TC0100008190.hg.1	2800.75	2869.07	CMPK1	1p32	NM_001136140	RefSeq	Homo sapiens cytidine monophosphate (UMP-CMP) kinase 1, cytosolic (CMPK1), transcript variant 2, mRNA.	FALSE	Hs.731647	chr1	+	47333797	47378839	P30085	GO:0006165 // GO:0006207 // GO:0006222 // GO:0009142 // GO:0009220 // GO:0015949 // GO:0044281 // GO:0055086 // GO:0006139 // GO:0006221 // GO:0016310 // GO:0046939	nucleoside diphosphate phosphorylation // 'de novo' pyrimidine nucleobase biosynthetic process // UMP biosynthetic process // nucleoside triphosphate biosynthetic process // pyrimidine ribonucleotide biosynthetic process // nucleobase-containing small molecule interconversion // small molecule metabolic process // nucleobase-containing small molecule metabolic process // nucleobase-containing com…	GO:0005634 // GO:0005737 // GO:0005829 // GO:0070062 // GO:0005634 // GO:0005737	nucleus // cytoplasm // cytosol // extracellular exosome // nucleus // cytoplasm	GO:0004127 // GO:0004550 // GO:0004849 // GO:0005524 // GO:0009041 // GO:0000166 // GO:0004550 // GO:0016301 // GO:0016740 // GO:0019205	cytidylate kinase activity // nucleoside diphosphate kinase activity // uridine kinase activity // ATP binding // uridylate kinase activity // nucleotide binding // nucleoside diphosphate kinase activity // kinase activity // transferase activity // nucleobase-containing compound kinase activity	---	---
TC0100008193.hg.1	61.1856	67.6688	FOXE3	1p32	NM_012186	RefSeq	Homo sapiens forkhead box E3 (FOXE3), mRNA.	FALSE	Hs.112968	chr1	+	47416072	47418052	Q13461	GO:0002088 // GO:0002930 // GO:0006357 // GO:0006366 // GO:0009653 // GO:0030154 // GO:0043066 // GO:0048468 // GO:0061072 // GO:0061073 // GO:0061303 // GO:0071157 // GO:1902747 // GO:2001111 // GO:2001111 // GO:0001654 // GO:0002088 // GO:0002930 // GO:0006351 // GO:0006355 // GO:0006357 // GO:0009653 // GO:0030154 // GO:0043010 // GO:0050679 // GO:0061072 // GO:0061073 // GO:0061303 // GO:1902…	lens development in camera-type eye // trabecular meshwork development // regulation of transcription from RNA polymerase II promoter // transcription from RNA polymerase II promoter // anatomical structure morphogenesis // cell differentiation // negative regulation of apoptotic process // cell development // iris morphogenesis // ciliary body morphogenesis // cornea development in camera-type e…	GO:0005634 // GO:0005667 // GO:0005634	nucleus // transcription factor complex // nucleus	GO:0000981 // GO:0003677 // GO:0003700 // GO:0003700 // GO:0043565 // GO:0000981 // GO:0003677 // GO:0003700 // GO:0043565	RNA polymerase II transcription factor activity, sequence-specific DNA binding // DNA binding // transcription factor activity, sequence-specific DNA binding // transcription factor activity, sequence-specific DNA binding // sequence-specific DNA binding // RNA polymerase II transcription factor activity, sequence-specific DNA binding // DNA binding // transcription factor activity, sequence-spec…	---	---
TC0100008194.hg.1	23.8592	34.5552	FOXD2	1p34-p32	NM_004474	RefSeq	Homo sapiens forkhead box D2 (FOXD2), mRNA.	FALSE	Hs.166188	chr1	+	47436017	47440691	O60548	GO:0006351 // GO:0006357 // GO:0009653 // GO:0030154 // GO:0006355 // GO:0006357 // GO:0009653 // GO:0030154	transcription, DNA-templated // regulation of transcription from RNA polymerase II promoter // anatomical structure morphogenesis // cell differentiation // regulation of transcription, DNA-templated // regulation of transcription from RNA polymerase II promoter // anatomical structure morphogenesis // cell differentiation	GO:0005634 // GO:0005634 // GO:0005634	nucleus // nucleus // nucleus	GO:0000981 // GO:0003700 // GO:0043565 // GO:0000981 // GO:0003677 // GO:0003700	RNA polymerase II transcription factor activity, sequence-specific DNA binding // transcription factor activity, sequence-specific DNA binding // sequence-specific DNA binding // RNA polymerase II transcription factor activity, sequence-specific DNA binding // DNA binding // transcription factor activity, sequence-specific DNA binding	---	---
TC0100008216.hg.1	16.0019	14.0888	SLC5A9	1p33	NM_001011547	RefSeq	Homo sapiens solute carrier family 5 (sodium/sugar cotransporter), member 9 (SLC5A9), transcript variant 2, mRNA.	FALSE	Hs.37890	chr1	+	48222685	48248644	Q2M3M2	GO:0006814 // GO:0055085 // GO:0006810 // GO:0006811 // GO:0055085	sodium ion transport // transmembrane transport // transport // ion transport // transmembrane transport	GO:0005886 // GO:0016021 // GO:0070062 // GO:0016020	plasma membrane // integral component of membrane // extracellular exosome // membrane	GO:0005215	transporter activity	---	---
TC0100008243.hg.1	19.9073	13.7065	ELAVL4	1p34	NM_001144774	RefSeq	Homo sapiens ELAV like neuron-specific RNA binding protein 4 (ELAVL4), transcript variant 2, mRNA.	FALSE	Hs.213050	chr1	+	50048014	50203786	P26378	GO:0006396 // GO:0006397	RNA processing // mRNA processing	---	---	GO:0000166 // GO:0003723 // GO:0003730 // GO:0017091 // GO:0003676 // GO:0003723	nucleotide binding // RNA binding // mRNA 3'-UTR binding // AU-rich element binding // nucleic acid binding // RNA binding	---	---
TC0100008260.hg.1	1810.22	1920.2	CDKN2C	1p32	NM_001262	RefSeq	Homo sapiens cyclin-dependent kinase inhibitor 2C (p18, inhibits CDK4) (CDKN2C), transcript variant 1, mRNA.	FALSE	Hs.525324	chr1	+	50960745	50974637	P42773	GO:0000079 // GO:0000082 // GO:0000278 // GO:0007050 // GO:0008285 // GO:0030308 // GO:0042326 // GO:0048709 // GO:0071901 // GO:0007049 // GO:0016310	regulation of cyclin-dependent protein serine/threonine kinase activity // G1/S transition of mitotic cell cycle // mitotic cell cycle // cell cycle arrest // negative regulation of cell proliferation // negative regulation of cell growth // negative regulation of phosphorylation // oligodendrocyte differentiation // negative regulation of protein serine/threonine kinase activity // cell cycle //…	GO:0005634 // GO:0005737 // GO:0005829	nucleus // cytoplasm // cytosol	GO:0004861 // GO:0005515 // GO:0019901 // GO:0016301	cyclin-dependent protein serine/threonine kinase inhibitor activity // protein binding // protein kinase binding // kinase activity	GenMAPP	G1_to_S_cell_cycle_Reactome
TC0100008266.hg.1	27.6444	22.8744	C1orf185	1p32.3	NM_001136508	RefSeq	Homo sapiens chromosome 1 open reading frame 185 (C1orf185), mRNA.	FALSE	Hs.176177	chr1	+	51102234	51148086	Q5T7R7	---	---	GO:0016021 // GO:0016020	integral component of membrane // membrane	---	---	---	---
TC0100008271.hg.1	904.6	1086.08	RNF11	1p32	NM_014372	RefSeq	Homo sapiens ring finger protein 11 (RNF11), mRNA.	FALSE	Hs.309641	chr1	+	51236271	51273455	Q9Y3C5	GO:0042787 // GO:0051865 // GO:0006511	protein ubiquitination involved in ubiquitin-dependent protein catabolic process // protein autoubiquitination // ubiquitin-dependent protein catabolic process	GO:0000151 // GO:0005634 // GO:0005769 // GO:0055037 // GO:0070062 // GO:0005737 // GO:0005768	ubiquitin ligase complex // nucleus // early endosome // recycling endosome // extracellular exosome // cytoplasm // endosome	GO:0003677 // GO:0004842 // GO:0005515 // GO:0008270 // GO:0008270 // GO:0046872	DNA binding // ubiquitin-protein transferase activity // protein binding // zinc ion binding // zinc ion binding // metal ion binding	---	---
TC0100008289.hg.1	6211.22	5717.11	OSBPL9	1p32.3	NM_024586	RefSeq	Homo sapiens oxysterol binding protein-like 9 (OSBPL9), transcript variant 6, mRNA.	FALSE	Hs.21938	chr1	+	51577179	51799154	Q96SU4	GO:0006869 // GO:0006810	lipid transport // transport	GO:0005737 // GO:0005794 // GO:0031902 // GO:0005768 // GO:0005794 // GO:0016020	cytoplasm // Golgi apparatus // late endosome membrane // endosome // Golgi apparatus // membrane	GO:0008289	lipid binding	---	---
TC0100008306.hg.1	5295.66	5189.89	BTF3L4	1p32.3	NM_001136497	RefSeq	Homo sapiens basic transcription factor 3-like 4 (BTF3L4), transcript variant 2, mRNA.	FALSE	Hs.429839	chr1	+	52056125	52090716	Q96K17	---	---	---	---	GO:0005515	protein binding	---	---
TC0100008308.hg.1	25.1211	21.9506	ZFYVE9	1p32.3	NM_004799	RefSeq	Homo sapiens zinc finger, FYVE domain containing 9 (ZFYVE9), transcript variant 3, mRNA.	FALSE	Hs.532345	chr1	+	52142094	52346686	O95405	GO:0006508 // GO:0006897 // GO:0007179 // GO:0007179 // GO:0007179 // GO:0007183 // GO:0007184 // GO:0030512	proteolysis // endocytosis // transforming growth factor beta receptor signaling pathway // transforming growth factor beta receptor signaling pathway // transforming growth factor beta receptor signaling pathway // SMAD protein complex assembly // SMAD protein import into nucleus // negative regulation of transforming growth factor beta receptor signaling pathway	GO:0005769 // GO:0031901 // GO:0031901 // GO:0005737 // GO:0005768 // GO:0016020 // GO:0031901	early endosome // early endosome membrane // early endosome membrane // cytoplasm // endosome // membrane // early endosome membrane	GO:0005515 // GO:0005545 // GO:0008236 // GO:0046872	protein binding // 1-phosphatidylinositol binding // serine-type peptidase activity // metal ion binding	GenMAPP	TGF_Beta_Signaling_Pathway
TC0100008315.hg.1	5295.36	5305.14	PRPF38A	1p32.3	NM_032864	RefSeq	Homo sapiens pre-mRNA processing factor 38A (PRPF38A), mRNA.	FALSE	Hs.5301	chr1	+	52404547	52420839	Q8NAV1	GO:0006397 // GO:0008380	mRNA processing // RNA splicing	GO:0005634 // GO:0031965 // GO:0071011 // GO:0005634 // GO:0005681 // GO:0071011	nucleus // nuclear membrane // precatalytic spliceosome // nucleus // spliceosomal complex // precatalytic spliceosome	GO:0005515 // GO:0044822	protein binding // poly(A) RNA binding	---	---
TC0100008321.hg.1	425.036	554.283	GPX7	1p32	NM_015696	RefSeq	Homo sapiens glutathione peroxidase 7 (GPX7), mRNA.	FALSE	Hs.43728	chr1	+	52602371	52609051	Q96SL4	GO:0000302 // GO:0055114 // GO:0006979	response to reactive oxygen species // oxidation-reduction process // response to oxidative stress	GO:0005576 // GO:0005783 // GO:0005788	extracellular region // endoplasmic reticulum // endoplasmic reticulum lumen	GO:0004096 // GO:0004601 // GO:0004602 // GO:0005515 // GO:0004601 // GO:0004601 // GO:0016491	catalase activity // peroxidase activity // glutathione peroxidase activity // protein binding // peroxidase activity // peroxidase activity // oxidoreductase activity	HumanCyc	PWY-4081
TC0100008326.hg.1	146.243	114.062	FAM159A	1p32.3	NM_001042693	RefSeq	Homo sapiens family with sequence similarity 159, member A (FAM159A), mRNA.	FALSE	Hs.424589	chr1	+	52633344	52669683	Q6UWV7	---	---	GO:0016021 // GO:0016020	integral component of membrane // membrane	---	---	---	---
TC0100008332.hg.1	70.945	73.7926	ZYG11B	1p32.3	NM_024646	RefSeq	Homo sapiens zyg-11 family member B, cell cycle regulator (ZYG11B), mRNA.	FALSE	Hs.476280	chr1	+	52726459	52827342	Q9C0D3	GO:0016567 // GO:0051438 // GO:0016567 // GO:0051438	protein ubiquitination // regulation of ubiquitin-protein transferase activity // protein ubiquitination // regulation of ubiquitin-protein transferase activity	GO:0031462 // GO:0031462	Cul2-RING ubiquitin ligase complex // Cul2-RING ubiquitin ligase complex	GO:0004842 // GO:0004842	ubiquitin-protein transferase activity // ubiquitin-protein transferase activity	---	---
TC0100008334.hg.1	14.7459	10.6213	ZYG11A	1p32.3	NM_001004339	RefSeq	Homo sapiens zyg-11 family member A, cell cycle regulator (ZYG11A), transcript variant 1, mRNA.	FALSE	Hs.658458	chr1	+	52842511	52894998	Q6WRX3	GO:0016567 // GO:0051438 // GO:0016567 // GO:0051438	protein ubiquitination // regulation of ubiquitin-protein transferase activity // protein ubiquitination // regulation of ubiquitin-protein transferase activity	GO:0031462 // GO:0031462	Cul2-RING ubiquitin ligase complex // Cul2-RING ubiquitin ligase complex	GO:0004842 // GO:0004842	ubiquitin-protein transferase activity // ubiquitin-protein transferase activity	---	---
TC0100008336.hg.1	13021.2	12973.7	SCP2	1p32	NM_001007098	RefSeq	Homo sapiens sterol carrier protein 2 (SCP2), transcript variant 2, mRNA.	FALSE	Hs.476365	chr1	+	52927229	53051703	P22307	GO:0006694 // GO:0006699 // GO:0006701 // GO:0007031 // GO:0008206 // GO:0015914 // GO:0015918 // GO:0032385 // GO:0032385 // GO:0032959 // GO:0033540 // GO:0033559 // GO:0036109 // GO:0044255 // GO:0044281 // GO:0045940 // GO:0072659 // GO:1901373 // GO:0006810 // GO:0006869 // GO:0008152 // GO:0015918	steroid biosynthetic process // bile acid biosynthetic process // progesterone biosynthetic process // peroxisome organization // bile acid metabolic process // phospholipid transport // sterol transport // positive regulation of intracellular cholesterol transport // positive regulation of intracellular cholesterol transport // inositol trisphosphate biosynthetic process // fatty acid beta-oxida…	GO:0005654 // GO:0005737 // GO:0005739 // GO:0005777 // GO:0005782 // GO:0016020 // GO:0043231 // GO:0043234 // GO:0070062 // GO:0005737 // GO:0005777	nucleoplasm // cytoplasm // mitochondrion // peroxisome // peroxisomal matrix // membrane // intracellular membrane-bounded organelle // protein complex // extracellular exosome // cytoplasm // peroxisome	GO:0000062 // GO:0005102 // GO:0005515 // GO:0008526 // GO:0015248 // GO:0015485 // GO:0033814 // GO:0036042 // GO:0070538 // GO:0003824 // GO:0008289 // GO:0015248 // GO:0016740 // GO:0016746 // GO:0016747	fatty-acyl-CoA binding // receptor binding // protein binding // phosphatidylinositol transporter activity // sterol transporter activity // cholesterol binding // propanoyl-CoA C-acyltransferase activity // long-chain fatty acyl-CoA binding // oleic acid binding // catalytic activity // lipid binding // sterol transporter activity // transferase activity // transferase activity, transferring acy…	GenMAPP	Mitochondrial_fatty_acid_betaoxidation
TC0100008341.hg.1	29.8921	28.3045	PODN	1p32.3	NM_001199080	RefSeq	Homo sapiens podocan (PODN), transcript variant 2, mRNA.	FALSE	Hs.586141	chr1	+	53062052	53085502	Q7Z5L7	GO:0008285 // GO:0030336	negative regulation of cell proliferation // negative regulation of cell migration	GO:0005578 // GO:0005615 // GO:0005737 // GO:0005576 // GO:0005737	proteinaceous extracellular matrix // extracellular space // cytoplasm // extracellular region // cytoplasm	GO:0005518	collagen binding	---	---
TC0100008342.hg.1	9.34322	12.3607	PODN	---	PODN.kAug10-unspliced	Ace View	Transcript Identified by AceView, Entrez Gene ID(s) 127435	FALSE	---	chr1	+	53086705	53087184	---	---	---	---	---	---	---	---	---
TC0100008347.hg.1	286.296	264.905	CPT2	1p32	NM_000098	RefSeq	Homo sapiens carnitine palmitoyltransferase 2 (CPT2), mRNA.	FALSE	Hs.713535	chr1	+	53196429	53214197	P23786	GO:0006635 // GO:0006853 // GO:0044255 // GO:0044281 // GO:0006629 // GO:0006631 // GO:0006810 // GO:0008152	fatty acid beta-oxidation // carnitine shuttle // cellular lipid metabolic process // small molecule metabolic process // lipid metabolic process // fatty acid metabolic process // transport // metabolic process	GO:0005654 // GO:0005730 // GO:0005739 // GO:0005743 // GO:0005743 // GO:0005739 // GO:0005743 // GO:0016020	nucleoplasm // nucleolus // mitochondrion // mitochondrial inner membrane // mitochondrial inner membrane // mitochondrion // mitochondrial inner membrane // membrane	GO:0004095 // GO:0004095 // GO:0016740 // GO:0016746	carnitine O-palmitoyltransferase activity // carnitine O-palmitoyltransferase activity // transferase activity // transferase activity, transferring acyl groups	GenMAPP // GenMAPP // MetaCyc	Fatty_Acid_Degradation // Mitochondrial_fatty_acid_betaoxidation // PWY-6111
TC0100008358.hg.1	20.7429	23.3135	DMRTB1	1p32.3	NM_033067	RefSeq	Homo sapiens DMRT-like family B with proline-rich C-terminal, 1 (DMRTB1), mRNA.	FALSE	Hs.131654	chr1	+	53459399	53467488	Q96MA1	GO:0006351 // GO:0006355 // GO:0007548 // GO:0007548	transcription, DNA-templated // regulation of transcription, DNA-templated // sex differentiation // sex differentiation	GO:0005634 // GO:0005634 // GO:0005634	nucleus // nucleus // nucleus	GO:0000987 // GO:0003700 // GO:0042803 // GO:0046872 // GO:0000987 // GO:0003677 // GO:0003700 // GO:0042803 // GO:0043565 // GO:0003700 // GO:0005515	core promoter proximal region sequence-specific DNA binding // transcription factor activity, sequence-specific DNA binding // protein homodimerization activity // metal ion binding // core promoter proximal region sequence-specific DNA binding // DNA binding // transcription factor activity, sequence-specific DNA binding // protein homodimerization activity // sequence-specific DNA binding // tr…	---	---
TC0100008366.hg.1	30.1595	19.538	DIO1	1p33-p32	NM_000792	RefSeq	Homo sapiens deiodinase, iodothyronine, type I (DIO1), transcript variant 1, mRNA.	FALSE	Hs.251415	chr1	+	53891239	53911086	P49895	GO:0006590 // GO:0034641 // GO:0042446 // GO:0044281 // GO:0055114	thyroid hormone generation // cellular nitrogen compound metabolic process // hormone biosynthetic process // small molecule metabolic process // oxidation-reduction process	GO:0005789 // GO:0005886 // GO:0016021 // GO:0005783 // GO:0016020	endoplasmic reticulum membrane // plasma membrane // integral component of membrane // endoplasmic reticulum // membrane	GO:0004800 // GO:0008430 // GO:0004800 // GO:0016491	thyroxine 5'-deiodinase activity // selenium binding // thyroxine 5'-deiodinase activity // oxidoreductase activity	---	---
TC0100008369.hg.1	480.649	606.229	LRRC42	1p33-p32.1	NM_001256409	RefSeq	Homo sapiens leucine rich repeat containing 42 (LRRC42), transcript variant 1, mRNA.	FALSE	Hs.40094	chr1	+	53946077	53968168	Q9Y546	---	---	---	---	---	---	---	---
TC0100008375.hg.1	317.69	177.891	TCEANC2	1p32.3	NM_153035	RefSeq	Homo sapiens transcription elongation factor A (SII) N-terminal and central domain containing 2 (TCEANC2), transcript variant 1, mRNA.	FALSE	Hs.558618	chr1	+	54053572	54112519	Q96MN5	GO:0006351	transcription, DNA-templated	GO:0005634	nucleus	GO:0003677 // GO:0005515	DNA binding // protein binding	---	---
TC0100008383.hg.1	5490.57	5727.67	MRPL37	1p32.1	NM_016491	RefSeq	Homo sapiens mitochondrial ribosomal protein L37 (MRPL37), mRNA.	FALSE	Hs.584908	chr1	+	54184041	54225464	Q9BZE1	GO:0006412 // GO:0006996 // GO:0032543 // GO:0070124 // GO:0070125 // GO:0070126 // GO:0006412	translation // organelle organization // mitochondrial translation // mitochondrial translational initiation // mitochondrial translational elongation // mitochondrial translational termination // translation	GO:0005739 // GO:0005743 // GO:0005761 // GO:0005739 // GO:0005840 // GO:0030529	mitochondrion // mitochondrial inner membrane // mitochondrial ribosome // mitochondrion // ribosome // ribonucleoprotein complex	GO:0003735 // GO:0044822 // GO:0003735	structural constituent of ribosome // poly(A) RNA binding // structural constituent of ribosome	---	---
TC0100008398.hg.1	17.0798	15.9869	ACOT11	1p32.3	NM_015547	RefSeq	Homo sapiens acyl-CoA thioesterase 11 (ACOT11), transcript variant 1, mRNA.	FALSE	Hs.745173	chr1	+	54542257	54639192	Q8WXI4	GO:0006631 // GO:0009266 // GO:0009409 // GO:0019432 // GO:0035338 // GO:0035556 // GO:0044255 // GO:0044281 // GO:0009266 // GO:0009409	fatty acid metabolic process // response to temperature stimulus // response to cold // triglyceride biosynthetic process // long-chain fatty-acyl-CoA biosynthetic process // intracellular signal transduction // cellular lipid metabolic process // small molecule metabolic process // response to temperature stimulus // response to cold	GO:0005737 // GO:0005829 // GO:0070062 // GO:0005737	cytoplasm // cytosol // extracellular exosome // cytoplasm	GO:0008289 // GO:0047617 // GO:0052689 // GO:0016787	lipid binding // acyl-CoA hydrolase activity // carboxylic ester hydrolase activity // hydrolase activity	---	---
TC0100008402.hg.1	14.3986	18.0337	MROH7	1p32.3	NM_001039464	RefSeq	Homo sapiens maestro heat-like repeat family member 7 (MROH7), transcript variant 1, mRNA.	FALSE	Hs.412482	chr1	+	54641740	54742657	Q68CQ1	---	---	GO:0005615 // GO:0016021 // GO:0016020	extracellular space // integral component of membrane // membrane	---	---	---	---
TC0100008410.hg.1	58.7035	64.1685	LEXM	1p32.3	NM_001110533	RefSeq	Homo sapiens lymphocyte expansion molecule (LEXM), transcript variant 2, mRNA.	FALSE	Hs.376018	chr1	+	54806063	54842264	Q3ZCV2	GO:0035740 // GO:0043382	CD8-positive, alpha-beta T cell proliferation // positive regulation of memory T cell differentiation	GO:0005739	mitochondrion	---	---	---	---
TC0100008411.hg.1	40.7801	35.8563	RP11-67L3.5	---	ENST00000415336.1	lncRNAWiki	N/A	FALSE	---	chr1	+	54886875	54889273	---	---	---	---	---	---	---	---	---
TC0100008414.hg.1	103.433	97.4848	TMEM61	1p32.3	NM_182532	RefSeq	Homo sapiens transmembrane protein 61 (TMEM61), mRNA.	FALSE	Hs.663950	chr1	+	54980664	54992293	Q8N0U2	---	---	GO:0016021 // GO:0016020	integral component of membrane // membrane	---	---	---	---
TC0100008416.hg.1	26.8552	30.341	BSND	1p32.1	NM_057176	RefSeq	Homo sapiens barttin CLCNK-type chloride channel accessory beta subunit (BSND), mRNA.	FALSE	Hs.151291	chr1	+	54998933	55010883	Q8WZ55	GO:0034220 // GO:0055085 // GO:1902476 // GO:0006821	ion transmembrane transport // transmembrane transport // chloride transmembrane transport // chloride transport	GO:0005737 // GO:0005886 // GO:0005887 // GO:0016323 // GO:0043234 // GO:0005886 // GO:0005887 // GO:0016020 // GO:0016021 // GO:0016323 // GO:0043234	cytoplasm // plasma membrane // integral component of plasma membrane // basolateral plasma membrane // protein complex // plasma membrane // integral component of plasma membrane // membrane // integral component of membrane // basolateral plasma membrane // protein complex	GO:0005254 // GO:0017081 // GO:0005254	chloride channel activity // chloride channel regulator activity // chloride channel activity	---	---
TC0100008417.hg.1	39.0227	36.3517	PCSK9	1p32.3	NM_174936	RefSeq	Homo sapiens proprotein convertase subtilisin/kexin type 9 (PCSK9), transcript variant 1, mRNA.	FALSE	Hs.18844	chr1	+	55039476	55064853	Q8NBP7	GO:0001822 // GO:0001889 // GO:0001920 // GO:0002092 // GO:0006508 // GO:0006641 // GO:0006644 // GO:0006915 // GO:0007041 // GO:0008203 // GO:0009267 // GO:0010469 // GO:0010989 // GO:0016540 // GO:0022008 // GO:0030182 // GO:0032802 // GO:0032805 // GO:0032869 // GO:0042157 // GO:0042632 // GO:0043523 // GO:0043525 // GO:2000272 // GO:2000650 // GO:0001822 // GO:0001889 // GO:0006508 // GO:0006…	kidney development // liver development // negative regulation of receptor recycling // positive regulation of receptor internalization // proteolysis // triglyceride metabolic process // phospholipid metabolic process // apoptotic process // lysosomal transport // cholesterol metabolic process // cellular response to starvation // regulation of receptor activity // negative regulation of low-den…	GO:0005615 // GO:0005737 // GO:0005764 // GO:0005769 // GO:0005770 // GO:0005783 // GO:0005791 // GO:0005794 // GO:0005886 // GO:0009986 // GO:0030134 // GO:0031232 // GO:0048471 // GO:1990666 // GO:1990667 // GO:0005576 // GO:0005737 // GO:0005764 // GO:0005768 // GO:0005783 // GO:0005794 // GO:0009986	extracellular space // cytoplasm // lysosome // early endosome // late endosome // endoplasmic reticulum // rough endoplasmic reticulum // Golgi apparatus // plasma membrane // cell surface // ER to Golgi transport vesicle // extrinsic component of external side of plasma membrane // perinuclear region of cytoplasm // PCSK9-LDLR complex // PCSK9-AnxA2 complex // extracellular region // cytoplasm …	GO:0004252 // GO:0005515 // GO:0019871 // GO:0030169 // GO:0030547 // GO:0034185 // GO:0034189 // GO:0034190 // GO:0043621 // GO:0044822 // GO:0050750 // GO:0050750 // GO:0070326 // GO:0004252 // GO:0008233 // GO:0008236 // GO:0016787 // GO:0030169 // GO:0034185 // GO:0034189	serine-type endopeptidase activity // protein binding // sodium channel inhibitor activity // low-density lipoprotein particle binding // receptor inhibitor activity // apolipoprotein binding // very-low-density lipoprotein particle binding // apolipoprotein receptor binding // protein self-association // poly(A) RNA binding // low-density lipoprotein particle receptor binding // low-density lipo…	---	---
TC0100008450.hg.1	11.4741	9.12775	PRKAA2	1p31	NM_006252	RefSeq	Homo sapiens protein kinase, AMP-activated, alpha 2 catalytic subunit (PRKAA2), mRNA.	FALSE	Hs.437039	chr1	+	56645317	56715335	P54646	GO:0006112 // GO:0006355 // GO:0006367 // GO:0006468 // GO:0006633 // GO:0006695 // GO:0006853 // GO:0006950 // GO:0006996 // GO:0007005 // GO:0007050 // GO:0007165 // GO:0008286 // GO:0008610 // GO:0010467 // GO:0010508 // GO:0014850 // GO:0016055 // GO:0016236 // GO:0016239 // GO:0016241 // GO:0031669 // GO:0032007 // GO:0032007 // GO:0035404 // GO:0035556 // GO:0035690 // GO:0042149 // GO:0042…	energy reserve metabolic process // regulation of transcription, DNA-templated // transcription initiation from RNA polymerase II promoter // protein phosphorylation // fatty acid biosynthetic process // cholesterol biosynthetic process // carnitine shuttle // response to stress // organelle organization // mitochondrion organization // cell cycle arrest // signal transduction // insulin receptor…	GO:0005654 // GO:0005654 // GO:0005737 // GO:0005829 // GO:0031588 // GO:0005634 // GO:0005654 // GO:0005737 // GO:0005737 // GO:0031588 // GO:0016020 // GO:0016021	nucleoplasm // nucleoplasm // cytoplasm // cytosol // nucleotide-activated protein kinase complex // nucleus // nucleoplasm // cytoplasm // cytoplasm // nucleotide-activated protein kinase complex // membrane // integral component of membrane	GO:0003682 // GO:0004672 // GO:0004674 // GO:0004679 // GO:0004712 // GO:0005515 // GO:0005524 // GO:0035174 // GO:0035174 // GO:0046872 // GO:0047322 // GO:0050405 // GO:0000166 // GO:0003682 // GO:0004672 // GO:0004674 // GO:0016301 // GO:0016740 // GO:0035174 // GO:0035174	chromatin binding // protein kinase activity // protein serine/threonine kinase activity // AMP-activated protein kinase activity // protein serine/threonine/tyrosine kinase activity // protein binding // ATP binding // histone serine kinase activity // histone serine kinase activity // metal ion binding // [hydroxymethylglutaryl-CoA reductase (NADPH)] kinase activity // [acetyl-CoA carboxylase] …	GenMAPP	Fatty_Acid_Synthesis
TC0100008454.hg.1	9.86902	8.35752	C8A	1p32	NM_000562	RefSeq	Homo sapiens complement component 8, alpha polypeptide (C8A), mRNA.	FALSE	Hs.93210	chr1	+	56854770	56918221	P07357	GO:0006955 // GO:0006956 // GO:0006957 // GO:0006958 // GO:0019835 // GO:0030449 // GO:0045087 // GO:0002376 // GO:0006955 // GO:0045087	immune response // complement activation // complement activation, alternative pathway // complement activation, classical pathway // cytolysis // regulation of complement activation // innate immune response // immune system process // immune response // innate immune response	GO:0005576 // GO:0005579 // GO:0005615 // GO:0016020 // GO:0070062 // GO:0072562 // GO:0005576 // GO:0005579 // GO:0005615 // GO:0005886 // GO:0016020 // GO:0016021	extracellular region // membrane attack complex // extracellular space // membrane // extracellular exosome // blood microparticle // extracellular region // membrane attack complex // extracellular space // plasma membrane // membrane // integral component of membrane	GO:0001848 // GO:0032403	complement binding // protein complex binding	GenMAPP	Complement_Activation_Classical
TC0100008496.hg.1	84.1815	92.7792	FGGY	1p32.1	NM_001113411	RefSeq	Homo sapiens FGGY carbohydrate kinase domain containing (FGGY), transcript variant 1, mRNA.	FALSE	Hs.444301	chr1	+	59296638	59767675	Q96C11	GO:0046835 // GO:0070050 // GO:0005975 // GO:0016310 // GO:0046835	carbohydrate phosphorylation // neuron cellular homeostasis // carbohydrate metabolic process // phosphorylation // carbohydrate phosphorylation	GO:0005737 // GO:0005575 // GO:0005737	cytoplasm // cellular_component // cytoplasm	GO:0016301 // GO:0016773 // GO:0003674 // GO:0016740 // GO:0016773 // GO:0016773	kinase activity // phosphotransferase activity, alcohol group as acceptor // molecular_function // transferase activity // phosphotransferase activity, alcohol group as acceptor // phosphotransferase activity, alcohol group as acceptor	---	---
TC0100008503.hg.1	77.5915	143.235	HOOK1	1p32.1	NM_015888	RefSeq	Homo sapiens hook microtubule-tethering protein 1 (HOOK1), mRNA.	FALSE	Hs.378836	chr1	+	59814786	59876378	Q9UJC3	GO:0007032 // GO:0007040 // GO:0007275 // GO:0007286 // GO:0008333 // GO:0015031 // GO:0045022 // GO:0006810 // GO:0007283 // GO:0030154	endosome organization // lysosome organization // multicellular organismal development // spermatid development // endosome to lysosome transport // protein transport // early endosome to late endosome transport // transport // spermatogenesis // cell differentiation	GO:0005874 // GO:0030897 // GO:0070695 // GO:0005737 // GO:0005856 // GO:0015630	microtubule // HOPS complex // FHF complex // cytoplasm // cytoskeleton // microtubule cytoskeleton	GO:0003779 // GO:0005515 // GO:0042802	actin binding // protein binding // identical protein binding	---	---
TC0100008517.hg.1	26.3652	19.0473	NFIA	1p31.3-p31.2	NM_001134673	RefSeq	Homo sapiens nuclear factor I/A (NFIA), transcript variant 1, mRNA.	FALSE	Hs.744898	chr1	+	60865259	61462793	Q12857	GO:0000122 // GO:0006260 // GO:0006355 // GO:0006366 // GO:0019079 // GO:0045944 // GO:0060074 // GO:0000122 // GO:0006351 // GO:0006355	negative regulation of transcription from RNA polymerase II promoter // DNA replication // regulation of transcription, DNA-templated // transcription from RNA polymerase II promoter // viral genome replication // positive regulation of transcription from RNA polymerase II promoter // synapse maturation // negative regulation of transcription from RNA polymerase II promoter // transcription, DNA-…	GO:0005634 // GO:0005634 // GO:0005654 // GO:0030054 // GO:0005622 // GO:0005634	nucleus // nucleus // nucleoplasm // cell junction // intracellular // nucleus	GO:0000978 // GO:0001077 // GO:0003682 // GO:0003700 // GO:0008134 // GO:0003677 // GO:0003700	RNA polymerase II core promoter proximal region sequence-specific DNA binding // transcriptional activator activity, RNA polymerase II core promoter proximal region sequence-specific binding // chromatin binding // transcription factor activity, sequence-specific DNA binding // transcription factor binding // DNA binding // transcription factor activity, sequence-specific DNA binding	---	---
TC0100008536.hg.1	150.161	145.219	INADL	1p31.3	NM_176877	RefSeq	Homo sapiens InaD-like (Drosophila) (INADL), mRNA.	FALSE	Hs.478125	chr1	+	61742477	62163920	Q8NI35	GO:0034329 // GO:0035556 // GO:0045216 // GO:0070830	cell junction assembly // intracellular signal transduction // cell-cell junction organization // bicellular tight junction assembly	GO:0005886 // GO:0005923 // GO:0016324 // GO:0048471 // GO:0070062 // GO:0005737 // GO:0005886 // GO:0005923 // GO:0016020 // GO:0030054 // GO:0045177 // GO:0048471	plasma membrane // bicellular tight junction // apical plasma membrane // perinuclear region of cytoplasm // extracellular exosome // cytoplasm // plasma membrane // bicellular tight junction // membrane // cell junction // apical part of cell // perinuclear region of cytoplasm	GO:0005515	protein binding	---	---
TC0100008549.hg.1	8.33968	10.2602	L1TD1	1p31.3	NM_001164835	RefSeq	Homo sapiens LINE-1 type transposase domain containing 1 (L1TD1), transcript variant 1, mRNA.	FALSE	Hs.685462	chr1	+	62194802	62212329	Q5T7N2	---	---	---	---	---	---	---	---
TC0100008554.hg.1	16314.9	16144.9	USP1	1p31.3	NM_001017415	RefSeq	Homo sapiens ubiquitin specific peptidase 1 (USP1), transcript variant 2, mRNA.	FALSE	Hs.35086	chr1	+	62436297	62451804	O94782	GO:0001501 // GO:0006281 // GO:0006282 // GO:0009411 // GO:0016579 // GO:0019985 // GO:0035520 // GO:0036297 // GO:0042769 // GO:0043161 // GO:0061136 // GO:0006281 // GO:0006508 // GO:0006511 // GO:0006974 // GO:0016579 // GO:0043161 // GO:0061136	skeletal system development // DNA repair // regulation of DNA repair // response to UV // protein deubiquitination // translesion synthesis // monoubiquitinated protein deubiquitination // interstrand cross-link repair // DNA damage response, detection of DNA damage // proteasome-mediated ubiquitin-dependent protein catabolic process // regulation of proteasomal protein catabolic process // DNA …	GO:0005634 // GO:0005654 // GO:0005634	nucleus // nucleoplasm // nucleus	GO:0004197 // GO:0004843 // GO:0004843 // GO:0005515 // GO:0004843 // GO:0008233 // GO:0008234 // GO:0016787 // GO:0036459	cysteine-type endopeptidase activity // ubiquitin-specific protease activity // ubiquitin-specific protease activity // protein binding // ubiquitin-specific protease activity // peptidase activity // cysteine-type peptidase activity // hydrolase activity // ubiquitinyl hydrolase activity	---	---
TC0100008559.hg.1	21.5268	19.2858	ANGPTL3	1p31.3	NM_014495	RefSeq	Homo sapiens angiopoietin-like 3 (ANGPTL3), mRNA.	FALSE	Hs.209153	chr1	+	62597487	62606305	Q9Y5C1	GO:0006071 // GO:0006631 // GO:0006644 // GO:0007160 // GO:0007165 // GO:0007229 // GO:0008203 // GO:0009395 // GO:0009725 // GO:0010519 // GO:0019915 // GO:0030335 // GO:0042632 // GO:0045766 // GO:0048844 // GO:0050996 // GO:0051005 // GO:0055088 // GO:0055090 // GO:0055091 // GO:0070328 // GO:0070328 // GO:0048844	glycerol metabolic process // fatty acid metabolic process // phospholipid metabolic process // cell-matrix adhesion // signal transduction // integrin-mediated signaling pathway // cholesterol metabolic process // phospholipid catabolic process // response to hormone // negative regulation of phospholipase activity // lipid storage // positive regulation of cell migration // cholesterol homeosta…	GO:0005615 // GO:0005769 // GO:0005794 // GO:0009986 // GO:0005576	extracellular space // early endosome // Golgi apparatus // cell surface // extracellular region	GO:0004857 // GO:0004859 // GO:0005178 // GO:0008083 // GO:0004857	enzyme inhibitor activity // phospholipase inhibitor activity // integrin binding // growth factor activity // enzyme inhibitor activity	---	---
TC0100008564.hg.1	283.438	237.663	ATG4C	1p31.3	NM_032852	RefSeq	Homo sapiens autophagy related 4C, cysteine peptidase (ATG4C), transcript variant 1, mRNA.	FALSE	Hs.7353	chr1	+	62784106	62865513	Q96DT6	GO:0000045 // GO:0000422 // GO:0006501 // GO:0006508 // GO:0006612 // GO:0006612 // GO:0006914 // GO:0006995 // GO:0016485 // GO:0044804 // GO:0051697 // GO:0000422 // GO:0006501 // GO:0006508 // GO:0006612 // GO:0006810 // GO:0006914 // GO:0006995 // GO:0015031 // GO:0016485 // GO:0044804 // GO:0051697	autophagosome assembly // mitophagy // C-terminal protein lipidation // proteolysis // protein targeting to membrane // protein targeting to membrane // autophagy // cellular response to nitrogen starvation // protein processing // nucleophagy // protein delipidation // mitophagy // C-terminal protein lipidation // proteolysis // protein targeting to membrane // transport // autophagy // cellular…	GO:0005576 // GO:0005737 // GO:0005829 // GO:0005829 // GO:0005737 // GO:0005829	extracellular region // cytoplasm // cytosol // cytosol // cytoplasm // cytosol	GO:0004197 // GO:0008233 // GO:0008233 // GO:0008234 // GO:0016787	cysteine-type endopeptidase activity // peptidase activity // peptidase activity // cysteine-type peptidase activity // hydrolase activity	---	---
TC0100008582.hg.1	17.7754	15.1587	FOXD3	1p31.3	NM_012183	RefSeq	Homo sapiens forkhead box D3 (FOXD3), mRNA.	FALSE	Hs.546573	chr1	+	63323041	63325126	Q9UJU5	GO:0000122 // GO:0000122 // GO:0001701 // GO:0001829 // GO:0001892 // GO:0006351 // GO:0009653 // GO:0030154 // GO:0035019 // GO:0045944 // GO:0006355 // GO:0007275 // GO:0009653 // GO:0030154	negative regulation of transcription from RNA polymerase II promoter // negative regulation of transcription from RNA polymerase II promoter // in utero embryonic development // trophectodermal cell differentiation // embryonic placenta development // transcription, DNA-templated // anatomical structure morphogenesis // cell differentiation // somatic stem cell population maintenance // positive …	GO:0000790 // GO:0005634 // GO:0005654 // GO:0005634 // GO:0005634	nuclear chromatin // nucleus // nucleoplasm // nucleus // nucleus	GO:0000977 // GO:0001227 // GO:0003700 // GO:0005515 // GO:0003677 // GO:0003700 // GO:0043565 // GO:0044212	RNA polymerase II regulatory region sequence-specific DNA binding // transcriptional repressor activity, RNA polymerase II transcription regulatory region sequence-specific binding // transcription factor activity, sequence-specific DNA binding // protein binding // DNA binding // transcription factor activity, sequence-specific DNA binding // sequence-specific DNA binding // transcription regula…	---	---
TC0100008584.hg.1	460.59	447.296	ALG6	1p31.3	NM_013339	RefSeq	Homo sapiens ALG6, alpha-1,3-glucosyltransferase (ALG6), mRNA.	FALSE	Hs.258501	chr1	+	63367590	63438562	Q9Y672	GO:0006487 // GO:0006487 // GO:0006488 // GO:0006490 // GO:0018279 // GO:0043687 // GO:0044267 // GO:0006486 // GO:0006490 // GO:0008152	protein N-linked glycosylation // protein N-linked glycosylation // dolichol-linked oligosaccharide biosynthetic process // oligosaccharide-lipid intermediate biosynthetic process // protein N-linked glycosylation via asparagine // post-translational protein modification // cellular protein metabolic process // protein glycosylation // oligosaccharide-lipid intermediate biosynthetic process // me…	GO:0005789 // GO:0005789 // GO:0016020 // GO:0016021 // GO:0005783 // GO:0005789 // GO:0005789 // GO:0016020	endoplasmic reticulum membrane // endoplasmic reticulum membrane // membrane // integral component of membrane // endoplasmic reticulum // endoplasmic reticulum membrane // endoplasmic reticulum membrane // membrane	GO:0042281 // GO:0046527 // GO:0016740 // GO:0016757 // GO:0016758 // GO:0042281	dolichyl pyrophosphate Man9GlcNAc2 alpha-1,3-glucosyltransferase activity // glucosyltransferase activity // transferase activity // transferase activity, transferring glycosyl groups // transferase activity, transferring hexosyl groups // dolichyl pyrophosphate Man9GlcNAc2 alpha-1,3-glucosyltransferase activity	GenMAPP	GPCRDB_Other
TC0100008588.hg.1	34.523	54.7498	EFCAB7	1p31.3	NM_032437	RefSeq	Homo sapiens EF-hand calcium binding domain 7 (EFCAB7), mRNA.	FALSE	Hs.652324	chr1	+	63523301	63572693	A8K855	---	---	GO:0072372	primary cilium	GO:0005509 // GO:0046872	calcium ion binding // metal ion binding	---	---
TC0100008591.hg.1	1879.05	1587.25	PGM1	1p31	NM_001172818	RefSeq	Homo sapiens phosphoglucomutase 1 (PGM1), transcript variant 2, mRNA.	FALSE	Hs.1869	chr1	+	63593276	63660246	P36871	GO:0005975 // GO:0005978 // GO:0005978 // GO:0005980 // GO:0006006 // GO:0006006 // GO:0006094 // GO:0006096 // GO:0009314 // GO:0019388 // GO:0019388 // GO:0044281 // GO:0005975 // GO:0005978 // GO:0006006 // GO:0019388 // GO:0071704	carbohydrate metabolic process // glycogen biosynthetic process // glycogen biosynthetic process // glycogen catabolic process // glucose metabolic process // glucose metabolic process // gluconeogenesis // glycolytic process // response to radiation // galactose catabolic process // galactose catabolic process // small molecule metabolic process // carbohydrate metabolic process // glycogen bios…	GO:0005737 // GO:0005829 // GO:0005829 // GO:0015629 // GO:0070062 // GO:0005737 // GO:0005829	cytoplasm // cytosol // cytosol // actin cytoskeleton // extracellular exosome // cytoplasm // cytosol	GO:0000287 // GO:0004614 // GO:0004614 // GO:0005515 // GO:0004614 // GO:0016853 // GO:0016868 // GO:0046872	magnesium ion binding // phosphoglucomutase activity // phosphoglucomutase activity // protein binding // phosphoglucomutase activity // isomerase activity // intramolecular transferase activity, phosphotransferases // metal ion binding	GenMAPP	Glycogen_Metabolism
TC0100008594.hg.1	27.4485	25.5515	ROR1	1p31.3	NM_001083592	RefSeq	Homo sapiens receptor tyrosine kinase-like orphan receptor 1 (ROR1), transcript variant 2, mRNA.	FALSE	Hs.128753	chr1	+	63774019	64181498	Q01973	GO:0007169 // GO:0016055 // GO:0018108 // GO:0018108 // GO:0006468 // GO:0007169 // GO:0016310	transmembrane receptor protein tyrosine kinase signaling pathway // Wnt signaling pathway // peptidyl-tyrosine phosphorylation // peptidyl-tyrosine phosphorylation // protein phosphorylation // transmembrane receptor protein tyrosine kinase signaling pathway // phosphorylation	GO:0005737 // GO:0005886 // GO:0005887 // GO:0043235 // GO:0016020 // GO:0016021	cytoplasm // plasma membrane // integral component of plasma membrane // receptor complex // membrane // integral component of membrane	GO:0004714 // GO:0005515 // GO:0005524 // GO:0017147 // GO:0000166 // GO:0004672 // GO:0004713 // GO:0016301 // GO:0016740	transmembrane receptor protein tyrosine kinase activity // protein binding // ATP binding // Wnt-protein binding // nucleotide binding // protein kinase activity // protein tyrosine kinase activity // kinase activity // transferase activity	GenMAPP	Nuclear_Receptors
TC0100008599.hg.1	14.0601	21.8312	UBE2U	1p31.3	NM_152489	RefSeq	Homo sapiens ubiquitin-conjugating enzyme E2U (putative) (UBE2U), mRNA.	FALSE	Hs.388746	chr1	+	64203627	64267368	Q5VVX9	GO:0000209 // GO:0006281 // GO:0016574 // GO:0043161 // GO:0000209 // GO:0006281 // GO:0016567 // GO:0016574 // GO:0043161	protein polyubiquitination // DNA repair // histone ubiquitination // proteasome-mediated ubiquitin-dependent protein catabolic process // protein polyubiquitination // DNA repair // protein ubiquitination // histone ubiquitination // proteasome-mediated ubiquitin-dependent protein catabolic process	GO:0000790 // GO:0005737 // GO:0033503 // GO:0000790 // GO:0005737 // GO:0033503	nuclear chromatin // cytoplasm // HULC complex // nuclear chromatin // cytoplasm // HULC complex	GO:0005515 // GO:0005524 // GO:0031625 // GO:0061630 // GO:0000166 // GO:0016740 // GO:0031625 // GO:0061630	protein binding // ATP binding // ubiquitin protein ligase binding // ubiquitin protein ligase activity // nucleotide binding // transferase activity // ubiquitin protein ligase binding // ubiquitin protein ligase activity	---	---
TC0100008602.hg.1	9.74451	9.49159	CACHD1	1p31.3	NM_001293274	RefSeq	Homo sapiens cache domain containing 1 (CACHD1), transcript variant 2, mRNA.	FALSE	Hs.443891	chr1	+	64470792	64693058	Q5VU97	GO:0006816 // GO:0006810 // GO:0006811	calcium ion transport // transport // ion transport	GO:0016021 // GO:0016020	integral component of membrane // membrane	---	---	---	---
TC0100008607.hg.1	21.0638	25.426	RAVER2	1p31.3	NM_018211	RefSeq	Homo sapiens ribonucleoprotein, PTB-binding 2 (RAVER2), mRNA.	FALSE	Hs.591443	chr1	+	64745095	65202396	Q9HCJ3	GO:0000398 // GO:0000398	mRNA splicing, via spliceosome // mRNA splicing, via spliceosome	GO:0005634 // GO:0005737 // GO:0005634 // GO:0005634 // GO:0019013 // GO:0030529	nucleus // cytoplasm // nucleus // nucleus // viral nucleocapsid // ribonucleoprotein complex	GO:0000166 // GO:0044822 // GO:0003676 // GO:0003723	nucleotide binding // poly(A) RNA binding // nucleic acid binding // RNA binding	---	---
TC0100008618.hg.1	36.3124	37.1951	AK4	1p31.3	NM_001005353	RefSeq	Homo sapiens adenylate kinase 4 (AK4), transcript variant 1, mRNA.	FALSE	Hs.10862	chr1	+	65147549	65232145	P27144	GO:0001889 // GO:0006165 // GO:0006172 // GO:0007420 // GO:0009142 // GO:0042493 // GO:0046033 // GO:0046034 // GO:0046039 // GO:0006139 // GO:0016310 // GO:0046033 // GO:0046034 // GO:0046039	liver development // nucleoside diphosphate phosphorylation // ADP biosynthetic process // brain development // nucleoside triphosphate biosynthetic process // response to drug // AMP metabolic process // ATP metabolic process // GTP metabolic process // nucleobase-containing compound metabolic process // phosphorylation // AMP metabolic process // ATP metabolic process // GTP metabolic process	GO:0005739 // GO:0005759 // GO:0070062 // GO:0005739 // GO:0005759	mitochondrion // mitochondrial matrix // extracellular exosome // mitochondrion // mitochondrial matrix	GO:0004017 // GO:0004550 // GO:0005524 // GO:0005525 // GO:0046899 // GO:0000166 // GO:0004550 // GO:0016301 // GO:0016740 // GO:0016776 // GO:0019205	adenylate kinase activity // nucleoside diphosphate kinase activity // ATP binding // GTP binding // nucleoside triphosphate adenylate kinase activity // nucleotide binding // nucleoside diphosphate kinase activity // kinase activity // transferase activity // phosphotransferase activity, phosphate group as acceptor // nucleobase-containing compound kinase activity	---	---
TC0100008620.hg.1	24.3362	42.9119	DNAJC6	1p31.3	NM_001256864	RefSeq	Homo sapiens DnaJ (Hsp40) homolog, subfamily C, member 6 (DNAJC6), transcript variant 1, mRNA.	FALSE	Hs.647643	chr1	+	65248219	65416006	O75061	GO:0006892 // GO:0035335 // GO:0061024 // GO:0072318 // GO:2000369 // GO:0006470 // GO:0008152	post-Golgi vesicle-mediated transport // peptidyl-tyrosine dephosphorylation // membrane organization // clathrin coat disassembly // regulation of clathrin-mediated endocytosis // protein dephosphorylation // metabolic process	GO:0005829 // GO:0097481 // GO:0045202	cytosol // neuronal postsynaptic density // synapse	GO:0004725 // GO:0017124 // GO:0004721 // GO:0016787	protein tyrosine phosphatase activity // SH3 domain binding // phosphoprotein phosphatase activity // hydrolase activity	---	---
TC0100008621.hg.1	227.348	200.163	LEPR	1p31	NM_001003679	RefSeq	Homo sapiens leptin receptor (LEPR), transcript variant 3, mRNA.	FALSE	Hs.723178	chr1	+	65420448	65641615	P48357	GO:0006112 // GO:0007166 // GO:0007275 // GO:0008203 // GO:0019221 // GO:0045721 // GO:0051346	energy reserve metabolic process // cell surface receptor signaling pathway // multicellular organismal development // cholesterol metabolic process // cytokine-mediated signaling pathway // negative regulation of gluconeogenesis // negative regulation of hydrolase activity	GO:0005576 // GO:0005886 // GO:0016021 // GO:0043235 // GO:0005886 // GO:0016020	extracellular region // plasma membrane // integral component of membrane // receptor complex // plasma membrane // membrane	GO:0004888 // GO:0004896 // GO:0005515 // GO:0042802	transmembrane signaling receptor activity // cytokine receptor activity // protein binding // identical protein binding	---	---
TC0100008622.hg.1	20.0429	19.8955	boyboy	---	boyboy.aAug10	Ace View	Transcript Identified by AceView	FALSE	---	chr1	+	65486391	65498770	---	---	---	---	---	---	---	---	---
TC0100008625.hg.1	415.165	501.18	PDE4B	1p31	NM_001037339	RefSeq	Homo sapiens phosphodiesterase 4B, cAMP-specific (PDE4B), transcript variant b, mRNA.	FALSE	Hs.198072	chr1	+	65792510	66374579	Q07343	GO:0001780 // GO:0006198 // GO:0006198 // GO:0006198 // GO:0030593 // GO:0032729 // GO:0032743 // GO:0035690 // GO:0050852 // GO:0050900 // GO:0071222 // GO:0071872 // GO:0086004 // GO:1901841 // GO:1901898 // GO:0001780 // GO:0007165 // GO:0030593 // GO:0035690 // GO:0050900 // GO:0071222 // GO:0008152	neutrophil homeostasis // cAMP catabolic process // cAMP catabolic process // cAMP catabolic process // neutrophil chemotaxis // positive regulation of interferon-gamma production // positive regulation of interleukin-2 production // cellular response to drug // T cell receptor signaling pathway // leukocyte migration // cellular response to lipopolysaccharide // cellular response to epinephrine …	GO:0000930 // GO:0005813 // GO:0005829 // GO:0005891 // GO:0008021 // GO:0014069 // GO:0030018 // GO:0043197 // GO:0060076 // GO:0005829 // GO:0016020 // GO:0071944	gamma-tubulin complex // centrosome // cytosol // voltage-gated calcium channel complex // synaptic vesicle // postsynaptic density // Z disc // dendritic spine // excitatory synapse // cytosol // membrane // cell periphery	GO:0004115 // GO:0004115 // GO:0004115 // GO:0030552 // GO:0043015 // GO:0044325 // GO:0046872 // GO:0004114 // GO:0004115 // GO:0008081 // GO:0016787	3',5'-cyclic-AMP phosphodiesterase activity // 3',5'-cyclic-AMP phosphodiesterase activity // 3',5'-cyclic-AMP phosphodiesterase activity // cAMP binding // gamma-tubulin binding // ion channel binding // metal ion binding // 3',5'-cyclic-nucleotide phosphodiesterase activity // 3',5'-cyclic-AMP phosphodiesterase activity // phosphoric diester hydrolase activity // hydrolase activity	GenMAPP // GenMAPP	G_Protein_Signaling // Smooth_muscle_contraction
TC0100008631.hg.1	12.0397	10.2391	SGIP1	1p31.3	NM_001308203	RefSeq	Homo sapiens SH3-domain GRB2-like (endophilin) interacting protein 1 (SGIP1), transcript variant 2, mRNA.	FALSE	Hs.132121	chr1	+	66533383	66751139	Q9BQI5	GO:0006897 // GO:0048260 // GO:0097320 // GO:0048260	endocytosis // positive regulation of receptor-mediated endocytosis // membrane tubulation // positive regulation of receptor-mediated endocytosis	GO:0005737 // GO:0005886 // GO:0005905 // GO:0030122 // GO:0030136 // GO:0005905 // GO:0016020 // GO:0030122 // GO:0030136	cytoplasm // plasma membrane // coated pit // AP-2 adaptor complex // clathrin-coated vesicle // coated pit // membrane // AP-2 adaptor complex // clathrin-coated vesicle	GO:0005515 // GO:0005543 // GO:0008017 // GO:0017124 // GO:0005543 // GO:0008017 // GO:0015631	protein binding // phospholipid binding // microtubule binding // SH3 domain binding // phospholipid binding // microtubule binding // tubulin binding	---	---
TC0100008637.hg.1	22.7968	12.0035	TCTEX1D1	1p31.3	NM_152665	RefSeq	Homo sapiens Tctex1 domain containing 1 (TCTEX1D1), mRNA.	FALSE	Hs.479226	chr1	+	66752457	66779047	Q8N7M0	---	---	---	---	GO:0005515	protein binding	---	---
TC0100008641.hg.1	2677.01	2797.97	MIER1	1p31.3	NM_001077700	RefSeq	Homo sapiens mesoderm induction early response 1, transcriptional regulator (MIER1), transcript variant 2, mRNA.	FALSE	Hs.605432	chr1	+	66924895	66988619	Q8N108	GO:0006351 // GO:0007165 // GO:0031937 // GO:0043123 // GO:0006355	transcription, DNA-templated // signal transduction // positive regulation of chromatin silencing // positive regulation of I-kappaB kinase/NF-kappaB signaling // regulation of transcription, DNA-templated	GO:0005654 // GO:0005737 // GO:0017053 // GO:0005634 // GO:0017053	nucleoplasm // cytoplasm // transcriptional repressor complex // nucleus // transcriptional repressor complex	GO:0003677 // GO:0004871 // GO:0005515 // GO:0004871	DNA binding // signal transducer activity // protein binding // signal transducer activity	---	---
TC0100008648.hg.1	48.9538	57.0677	IL23R	1p31.3	NM_144701	RefSeq	Homo sapiens interleukin 23 receptor (IL23R), mRNA.	FALSE	Hs.677426	chr1	+	67166400	67259979	Q5VWK5	GO:0001916 // GO:0002230 // GO:0002230 // GO:0002827 // GO:0002827 // GO:0006954 // GO:0010535 // GO:0032496 // GO:0032693 // GO:0032725 // GO:0032729 // GO:0032729 // GO:0032729 // GO:0032735 // GO:0032740 // GO:0032819 // GO:0034341 // GO:0038155 // GO:0042102 // GO:0042104 // GO:0042510 // GO:0042517 // GO:0042520 // GO:0042523 // GO:0043382 // GO:0045672 // GO:0050829 // GO:0051135 // GO:2000…	positive regulation of T cell mediated cytotoxicity // positive regulation of defense response to virus by host // positive regulation of defense response to virus by host // positive regulation of T-helper 1 type immune response // positive regulation of T-helper 1 type immune response // inflammatory response // positive regulation of activation of JAK2 kinase activity // response to lipopolysa…	GO:0043235 // GO:0072536 // GO:0005886 // GO:0016020 // GO:0016021	receptor complex // interleukin-23 receptor complex // plasma membrane // membrane // integral component of membrane	GO:0005143 // GO:0005515 // GO:0042019 // GO:0042020 // GO:0004896	interleukin-12 receptor binding // protein binding // interleukin-23 binding // interleukin-23 receptor activity // cytokine receptor activity	---	---
TC0100008653.hg.1	33910.7	31998.7	IL12RB2	1p31.3-p31.2	NM_001258214	RefSeq	Homo sapiens interleukin 12 receptor, beta 2 (IL12RB2), transcript variant 2, mRNA.	FALSE	Hs.479347	chr1	+	67307364	67396900	Q99665	GO:0007166 // GO:0008284 // GO:0018108 // GO:0019221 // GO:0019221 // GO:0032496 // GO:0032609 // GO:0032729 // GO:0034097	cell surface receptor signaling pathway // positive regulation of cell proliferation // peptidyl-tyrosine phosphorylation // cytokine-mediated signaling pathway // cytokine-mediated signaling pathway // response to lipopolysaccharide // interferon-gamma production // positive regulation of interferon-gamma production // response to cytokine	GO:0005887 // GO:0009897 // GO:0016020 // GO:0016021	integral component of plasma membrane // external side of plasma membrane // membrane // integral component of membrane	GO:0004896 // GO:0019901 // GO:0004896	cytokine receptor activity // protein kinase binding // cytokine receptor activity	---	---
TC0100008664.hg.1	475.448	588.434	GADD45A	1p31.2	NM_001199741	RefSeq	Homo sapiens growth arrest and DNA-damage-inducible, alpha (GADD45A), transcript variant 2, mRNA.	FALSE	Hs.80409	chr1	+	67685061	67688338	P24522	GO:0000079 // GO:0000086 // GO:0000185 // GO:0006281 // GO:0006469 // GO:0006915 // GO:0007050 // GO:0007098 // GO:0042770 // GO:0043065 // GO:0046330 // GO:0071260 // GO:0071479 // GO:0071850 // GO:1900745 // GO:2000379 // GO:0006950 // GO:0006974 // GO:0007049 // GO:0007050 // GO:0051726	regulation of cyclin-dependent protein serine/threonine kinase activity // G2/M transition of mitotic cell cycle // activation of MAPKKK activity // DNA repair // negative regulation of protein kinase activity // apoptotic process // cell cycle arrest // centrosome cycle // signal transduction in response to DNA damage // positive regulation of apoptotic process // positive regulation of JNK casc…	GO:0005634 // GO:0005654 // GO:0005737 // GO:0005634	nucleus // nucleoplasm // cytoplasm // nucleus	GO:0001047 // GO:0005515	core promoter binding // protein binding	GenMAPP // GenMAPP	Cell_cycle_KEGG // G1_to_S_cell_cycle_Reactome
TC0100008686.hg.1	9.77565	14.8367	LRRC7	1p31.1	NM_020794	RefSeq	Homo sapiens leucine rich repeat containing 7 (LRRC7), mRNA.	FALSE	Hs.479658	chr1	+	69568398	70151945	Q96NW7	---	---	GO:0005737 // GO:0014069 // GO:0030054 // GO:0045211 // GO:0005886 // GO:0016020 // GO:0045202	cytoplasm // postsynaptic density // cell junction // postsynaptic membrane // plasma membrane // membrane // synapse	GO:0005515	protein binding	---	---
TC0100008692.hg.1	6806.68	6008.6	SRSF11	1p31	NM_001190987	RefSeq	Homo sapiens serine/arginine-rich splicing factor 11 (SRSF11), transcript variant 2, mRNA.	FALSE	Hs.479693	chr1	+	70205682	70253052	Q05519	GO:0000398 // GO:0006366 // GO:0006369 // GO:0006397 // GO:0006406 // GO:0008380 // GO:0010467 // GO:0031124 // GO:0006397 // GO:0008380	mRNA splicing, via spliceosome // transcription from RNA polymerase II promoter // termination of RNA polymerase II transcription // mRNA processing // mRNA export from nucleus // RNA splicing // gene expression // mRNA 3'-end processing // mRNA processing // RNA splicing	GO:0005634 // GO:0005654 // GO:0005654 // GO:0005634	nucleus // nucleoplasm // nucleoplasm // nucleus	GO:0000166 // GO:0005515 // GO:0044822 // GO:0003676 // GO:0003723	nucleotide binding // protein binding // poly(A) RNA binding // nucleic acid binding // RNA binding	---	---
TC0100008696.hg.1	57.0636	68.0681	HHLA3	1p31.1	NM_001031693	RefSeq	Homo sapiens HERV-H LTR-associating 3 (HHLA3), transcript variant 1, mRNA.	FALSE	Hs.142245	chr1	+	70354805	70385339	Q9XRX5	---	---	---	---	GO:0005515	protein binding	---	---
TC0100008697.hg.1	84.0793	73.6882	CTH	1p31.1	NM_001190463	RefSeq	Homo sapiens cystathionine gamma-lyase (CTH), transcript variant 3, mRNA.	FALSE	Hs.19904	chr1	+	70411218	70439851	P32929	GO:0000096 // GO:0000098 // GO:0006534 // GO:0018272 // GO:0019343 // GO:0019344 // GO:0019346 // GO:0019346 // GO:0030968 // GO:0034641 // GO:0043123 // GO:0044281 // GO:0044524 // GO:0051092 // GO:0051289 // GO:0070814 // GO:0070814 // GO:2001234 // GO:0008652 // GO:0019344 // GO:0043066	sulfur amino acid metabolic process // sulfur amino acid catabolic process // cysteine metabolic process // protein-pyridoxal-5-phosphate linkage via peptidyl-N6-pyridoxal phosphate-L-lysine // cysteine biosynthetic process via cystathionine // cysteine biosynthetic process // transsulfuration // transsulfuration // endoplasmic reticulum unfolded protein response // cellular nitrogen compound met…	GO:0005634 // GO:0005737 // GO:0005829 // GO:0070062 // GO:0005737	nucleus // cytoplasm // cytosol // extracellular exosome // cytoplasm	GO:0004123 // GO:0004123 // GO:0005515 // GO:0005516 // GO:0016846 // GO:0030170 // GO:0044540 // GO:0047982 // GO:0080146 // GO:0003824 // GO:0004123 // GO:0016829 // GO:0030170 // GO:0044540 // GO:0080146	cystathionine gamma-lyase activity // cystathionine gamma-lyase activity // protein binding // calmodulin binding // carbon-sulfur lyase activity // pyridoxal phosphate binding // L-cystine L-cysteine-lyase (deaminating) // homocysteine desulfhydrase activity // L-cysteine desulfhydrase activity // catalytic activity // cystathionine gamma-lyase activity // lyase activity // pyridoxal phosphate b…	---	---
TC0100008752.hg.1	886.728	946.321	TYW3	1p31.1	NM_001162916	RefSeq	Homo sapiens tRNA-yW synthesizing protein 3 homolog (S. cerevisiae) (TYW3), transcript variant 2, mRNA.	FALSE	Hs.348411	chr1	+	74733152	74766678	Q6IPR3	GO:0006400 // GO:0008033 // GO:0010467 // GO:0032259 // GO:0008033	tRNA modification // tRNA processing // gene expression // methylation // tRNA processing	---	---	GO:0008168 // GO:0016740	methyltransferase activity // transferase activity	---	---
TC0100008757.hg.1	32.092	35.0911	LHX8	1p31.1	NM_001001933	RefSeq	Homo sapiens LIM homeobox 8 (LHX8), transcript variant 1, mRNA.	FALSE	Hs.403934	chr1	+	75128434	75161533	Q68G74	GO:0006351 // GO:0006355 // GO:0007611 // GO:0008585 // GO:0021884 // GO:0042475 // GO:0021879	transcription, DNA-templated // regulation of transcription, DNA-templated // learning or memory // female gonad development // forebrain neuron development // odontogenesis of dentin-containing tooth // forebrain neuron differentiation	GO:0001674 // GO:0005634	female germ cell nucleus // nucleus	GO:0005515 // GO:0008270 // GO:0043565 // GO:0003677 // GO:0046872	protein binding // zinc ion binding // sequence-specific DNA binding // DNA binding // metal ion binding	---	---
TC0100008772.hg.1	456.815	406.87	RABGGTB	---	hsa_circ_0092339	circbase	Zhang2013 ALT_ACCEPTOR, ALT_DONOR, coding, INTERNAL, intronic best transcript NM_004582	FALSE	---	chr1	+	75790758	75790977	---	---	---	---	---	---	---	---	---
TC0100008773.hg.1	10.8223	8.84786	MSH4	1p31	NM_002440	RefSeq	Homo sapiens mutS homolog 4 (MSH4), mRNA.	FALSE	Hs.216639	chr1	+	75795212	75913238	O15457	GO:0000710 // GO:0001541 // GO:0007131 // GO:0007283 // GO:0007292 // GO:0045143 // GO:0051026 // GO:0000710 // GO:0006298 // GO:0007126 // GO:0007129 // GO:0045143 // GO:0051026 // GO:0051321	meiotic mismatch repair // ovarian follicle development // reciprocal meiotic recombination // spermatogenesis // female gamete generation // homologous chromosome segregation // chiasma assembly // meiotic mismatch repair // mismatch repair // meiotic nuclear division // synapsis // homologous chromosome segregation // chiasma assembly // meiotic cell cycle	GO:0000228 // GO:0000795 // GO:0005634 // GO:0032300 // GO:0000228 // GO:0000793 // GO:0000794 // GO:0000795 // GO:0000795 // GO:0005634 // GO:0032300	nuclear chromosome // synaptonemal complex // nucleus // mismatch repair complex // nuclear chromosome // condensed chromosome // condensed nuclear chromosome // synaptonemal complex // synaptonemal complex // nucleus // mismatch repair complex	GO:0003677 // GO:0003684 // GO:0005515 // GO:0005524 // GO:0008094 // GO:0030983 // GO:0000166 // GO:0003677 // GO:0003684 // GO:0008094 // GO:0030983 // GO:0030983	DNA binding // damaged DNA binding // protein binding // ATP binding // DNA-dependent ATPase activity // mismatched DNA binding // nucleotide binding // DNA binding // damaged DNA binding // DNA-dependent ATPase activity // mismatched DNA binding // mismatched DNA binding	---	---
TC0100008779.hg.1	28.9696	15.489	ST6GALNAC3	1p31.1	NM_001160011	RefSeq	Homo sapiens ST6 (alpha-N-acetyl-neuraminyl-2,3-beta-galactosyl-1, 3)-N-acetylgalactosaminide alpha-2,6-sialyltransferase 3 (ST6GALNAC3), transcript variant 2, mRNA.	FALSE	Hs.337040 // Hs.677241 // Hs.679096	chr1	+	76074704	76634601	Q8NDV1	GO:0001574 // GO:0006488 // GO:0006677 // GO:0006687 // GO:0009100 // GO:0009311 // GO:0016266 // GO:0018279 // GO:0043687 // GO:0044267 // GO:0097503 // GO:0097503 // GO:0097503 // GO:0001574 // GO:0006486 // GO:0009311 // GO:0016266 // GO:0097503	ganglioside biosynthetic process // dolichol-linked oligosaccharide biosynthetic process // glycosylceramide metabolic process // glycosphingolipid metabolic process // glycoprotein metabolic process // oligosaccharide metabolic process // O-glycan processing // protein N-linked glycosylation via asparagine // post-translational protein modification // cellular protein metabolic process // sialyl…	GO:0000139 // GO:0016021 // GO:0000139 // GO:0005794 // GO:0016020	Golgi membrane // integral component of membrane // Golgi membrane // Golgi apparatus // membrane	GO:0001665 // GO:0008373 // GO:0001665 // GO:0008373 // GO:0016740 // GO:0016757	alpha-N-acetylgalactosaminide alpha-2,6-sialyltransferase activity // sialyltransferase activity // alpha-N-acetylgalactosaminide alpha-2,6-sialyltransferase activity // sialyltransferase activity // transferase activity // transferase activity, transferring glycosyl groups	---	---
TC0100008787.hg.1	23.2374	28.0661	ST6GALNAC5	1p31.1	NM_030965	RefSeq	Homo sapiens ST6 (alpha-N-acetyl-neuraminyl-2,3-beta-galactosyl-1, 3)-N-acetylgalactosaminide alpha-2,6-sialyltransferase 5 (ST6GALNAC5), mRNA.	FALSE	Hs.303609	chr1	+	76867441	77065711	Q9BVH7	GO:0001574 // GO:0006488 // GO:0006688 // GO:0009311 // GO:0009312 // GO:0016266 // GO:0018279 // GO:0043687 // GO:0044267 // GO:0097503 // GO:0001574 // GO:0006486 // GO:0009311 // GO:0016266 // GO:0097503 // GO:0097503 // GO:0008152	ganglioside biosynthetic process // dolichol-linked oligosaccharide biosynthetic process // glycosphingolipid biosynthetic process // oligosaccharide metabolic process // oligosaccharide biosynthetic process // O-glycan processing // protein N-linked glycosylation via asparagine // post-translational protein modification // cellular protein metabolic process // sialylation // ganglioside biosynth…	GO:0000139 // GO:0016021 // GO:0000139 // GO:0005794 // GO:0016020	Golgi membrane // integral component of membrane // Golgi membrane // Golgi apparatus // membrane	GO:0001665 // GO:0001665 // GO:0008373 // GO:0001665 // GO:0008373 // GO:0016740 // GO:0016757	alpha-N-acetylgalactosaminide alpha-2,6-sialyltransferase activity // alpha-N-acetylgalactosaminide alpha-2,6-sialyltransferase activity // sialyltransferase activity // alpha-N-acetylgalactosaminide alpha-2,6-sialyltransferase activity // sialyltransferase activity // transferase activity // transferase activity, transferring glycosyl groups	---	---
TC0100008797.hg.1	12.8803	14.7685	AK5	1p31	NM_012093	RefSeq	Homo sapiens adenylate kinase 5 (AK5), transcript variant 2, mRNA.	FALSE	Hs.559718	chr1	+	77281977	77559969	Q9Y6K8	GO:0006165 // GO:0006172 // GO:0006173 // GO:0009142 // GO:0009220 // GO:0015949 // GO:0044281 // GO:0046034 // GO:0055086 // GO:0006139 // GO:0016310	nucleoside diphosphate phosphorylation // ADP biosynthetic process // dADP biosynthetic process // nucleoside triphosphate biosynthetic process // pyrimidine ribonucleotide biosynthetic process // nucleobase-containing small molecule interconversion // small molecule metabolic process // ATP metabolic process // nucleobase-containing small molecule metabolic process // nucleobase-containing compo…	GO:0005737 // GO:0005815 // GO:0005829 // GO:0005737	cytoplasm // microtubule organizing center // cytosol // cytoplasm	GO:0004017 // GO:0004550 // GO:0005524 // GO:0000166 // GO:0004017 // GO:0004550 // GO:0016301 // GO:0016740 // GO:0019205	adenylate kinase activity // nucleoside diphosphate kinase activity // ATP binding // nucleotide binding // adenylate kinase activity // nucleoside diphosphate kinase activity // kinase activity // transferase activity // nucleobase-containing compound kinase activity	HumanCyc // HumanCyc // MetaCyc // MetaCyc	P1-PWY // PWY-6126 // PWY-7219 // PWY-7224
TC0100008803.hg.1	335.068	261.616	FAM73A	1p31.1	NM_001270384	RefSeq	Homo sapiens family with sequence similarity 73, member A (FAM73A), transcript variant 2, mRNA.	FALSE	Hs.437755	chr1	+	77779624	77879540	Q8NAN2	---	---	GO:0016021 // GO:0016020	integral component of membrane // membrane	---	---	---	---
TC0100008807.hg.1	50.482	68.4214	NEXN	1p31.1	NM_001172309	RefSeq	Homo sapiens nexilin (F actin binding protein) (NEXN), transcript variant 2, mRNA.	FALSE	Hs.612385	chr1	+	77888513	77943895	Q0ZGT2	GO:0006468 // GO:0030334 // GO:0051493 // GO:0006468	protein phosphorylation // regulation of cell migration // regulation of cytoskeleton organization // protein phosphorylation	GO:0005856 // GO:0005925 // GO:0030018 // GO:0005737 // GO:0005912 // GO:0030018 // GO:0030054	cytoskeleton // focal adhesion // Z disc // cytoplasm // adherens junction // Z disc // cell junction	GO:0008307 // GO:0051015 // GO:0003779	structural constituent of muscle // actin filament binding // actin binding	---	---
TC0100008812.hg.1	13.2092	17.2874	PTGFR	1p31.1	NM_000959	RefSeq	Homo sapiens prostaglandin F receptor (FP) (PTGFR), transcript variant 1, mRNA.	FALSE	Hs.654365	chr1	+	78303884	78540701	P43088	GO:0007186 // GO:0007567 // GO:0008284 // GO:0010628 // GO:0032355 // GO:0032496 // GO:0035584 // GO:0043066 // GO:0071799 // GO:0007165 // GO:0007186	G-protein coupled receptor signaling pathway // parturition // positive regulation of cell proliferation // positive regulation of gene expression // response to estradiol // response to lipopolysaccharide // calcium-mediated signaling using intracellular calcium source // negative regulation of apoptotic process // cellular response to prostaglandin D stimulus // signal transduction // G-protein…	GO:0005576 // GO:0005737 // GO:0005886 // GO:0005886 // GO:0005887 // GO:0005886 // GO:0016020 // GO:0016021	extracellular region // cytoplasm // plasma membrane // plasma membrane // integral component of plasma membrane // plasma membrane // membrane // integral component of membrane	GO:0004958 // GO:0004871 // GO:0004930 // GO:0004958 // GO:0004958	prostaglandin F receptor activity // signal transducer activity // G-protein coupled receptor activity // prostaglandin F receptor activity // prostaglandin F receptor activity	GenMAPP // GenMAPP // GenMAPP // GenMAPP	Prostaglandin_synthesis_regulation // GPCRDB_Class_A_Rhodopsin-like // GPCRDB_Other // Small_ligand_GPCRs
TC0100008815.hg.1	1339.48	714.666	IFI44L	1p31.1	NM_006820	RefSeq	Homo sapiens interferon-induced protein 44-like (IFI44L), mRNA.	FALSE	Hs.744918	chr1	+	78619922	78646145	Q53G44	GO:0006955 // GO:0051607	immune response // defense response to virus	GO:0005654 // GO:0005737	nucleoplasm // cytoplasm	GO:0005525	GTP binding	---	---
TC0100008816.hg.1	748.889	469.174	IFI44	1p31.1	NM_006417	RefSeq	Homo sapiens interferon-induced protein 44 (IFI44), mRNA.	FALSE	Hs.82316	chr1	+	78649792	78664078	Q8TCB0	GO:0009615	response to virus	GO:0005737	cytoplasm	---	---	---	---
TC0100008845.hg.1	55.0303	46.2185	ADGRL2	1p31.1	NM_001297704	RefSeq	Homo sapiens adhesion G protein-coupled receptor L2 (ADGRL2), transcript variant 2, mRNA.	FALSE	Hs.24212 // Hs.649282	chr1	+	81306160	81992738	O95490	GO:0007166 // GO:0007186 // GO:0051965 // GO:0007165 // GO:0007186 // GO:0007186	cell surface receptor signaling pathway // G-protein coupled receptor signaling pathway // positive regulation of synapse assembly // signal transduction // G-protein coupled receptor signaling pathway // G-protein coupled receptor signaling pathway	GO:0016021 // GO:0016020 // GO:0016021 // GO:0016021	integral component of membrane // membrane // integral component of membrane // integral component of membrane	GO:0004930 // GO:0016524 // GO:0030246 // GO:0004871 // GO:0004888 // GO:0004930	G-protein coupled receptor activity // latrotoxin receptor activity // carbohydrate binding // signal transducer activity // transmembrane signaling receptor activity // G-protein coupled receptor activity	GenMAPP // GenMAPP	GPCRDB_Class_B_Secretin-like // GPCRDB_Other
TC0100008874.hg.1	14323.2	12305.1	PRKACB	1p31.1	NM_001242857	RefSeq	Homo sapiens protein kinase, cAMP-dependent, catalytic, beta (PRKACB), transcript variant 4, mRNA.	FALSE	Hs.487325	chr1	+	84077975	84238498	P22694	GO:0001843 // GO:0002223 // GO:0003091 // GO:0005975 // GO:0006006 // GO:0006094 // GO:0006112 // GO:0006468 // GO:0006833 // GO:0007165 // GO:0007173 // GO:0007188 // GO:0007202 // GO:0007268 // GO:0007596 // GO:0008543 // GO:0019433 // GO:0034199 // GO:0035556 // GO:0044281 // GO:0045087 // GO:0048011 // GO:0050796 // GO:0051447 // GO:0055085 // GO:0070613 // GO:0071377 // GO:0097338 // GO:1901…	neural tube closure // stimulatory C-type lectin receptor signaling pathway // renal water homeostasis // carbohydrate metabolic process // glucose metabolic process // gluconeogenesis // energy reserve metabolic process // protein phosphorylation // water transport // signal transduction // epidermal growth factor receptor signaling pathway // adenylate cyclase-modulating G-protein coupled recep…	GO:0005654 // GO:0005813 // GO:0005829 // GO:0005886 // GO:0005952 // GO:0048471 // GO:0070062 // GO:0097546 // GO:0005634 // GO:0005737 // GO:0005829 // GO:0005952 // GO:0016020 // GO:0097546	nucleoplasm // centrosome // cytosol // plasma membrane // cAMP-dependent protein kinase complex // perinuclear region of cytoplasm // extracellular exosome // ciliary base // nucleus // cytoplasm // cytosol // cAMP-dependent protein kinase complex // membrane // ciliary base	GO:0000287 // GO:0004691 // GO:0005515 // GO:0005524 // GO:0031625 // GO:0000166 // GO:0004672 // GO:0004674 // GO:0004691 // GO:0004691 // GO:0005524 // GO:0016301 // GO:0016740	magnesium ion binding // cAMP-dependent protein kinase activity // protein binding // ATP binding // ubiquitin protein ligase binding // nucleotide binding // protein kinase activity // protein serine/threonine kinase activity // cAMP-dependent protein kinase activity // cAMP-dependent protein kinase activity // ATP binding // kinase activity // transferase activity	GenMAPP // GenMAPP // GenMAPP	G_Protein_Signaling // Calcium_regulation_in_cardiac_cells // Smooth_muscle_contraction
TC0100008879.hg.1	44.4572	26.3846	SAMD13	1p31.1	NM_001010971	RefSeq	Homo sapiens sterile alpha motif domain containing 13 (SAMD13), transcript variant 1, mRNA.	FALSE	Hs.591445	chr1	+	84298366	84389957	Q5VXD3	---	---	---	---	---	---	---	---
TC0100008882.hg.1	21.9368	20.0288	DNASE2B	1p22.3	NM_021233	RefSeq	Homo sapiens deoxyribonuclease II beta (DNASE2B), transcript variant 1, mRNA.	FALSE	Hs.129142	chr1	+	84398532	84415018	Q8WZ79	GO:0006309 // GO:0006259 // GO:0006309	apoptotic DNA fragmentation // DNA metabolic process // apoptotic DNA fragmentation	GO:0005576 // GO:0005622 // GO:0005764 // GO:0005622 // GO:0005737	extracellular region // intracellular // lysosome // intracellular // cytoplasm	GO:0004531 // GO:0004518 // GO:0004519 // GO:0004520 // GO:0004531 // GO:0004531 // GO:0016787	deoxyribonuclease II activity // nuclease activity // endonuclease activity // endodeoxyribonuclease activity // deoxyribonuclease II activity // deoxyribonuclease II activity // hydrolase activity	---	---
TC0100008884.hg.1	5618.99	6003.07	RPF1	1p22.3	NM_025065	RefSeq	Homo sapiens ribosome production factor 1 homolog (RPF1), mRNA.	FALSE	Hs.481202	chr1	+	84479237	84498350	Q9H9Y2	GO:0000027 // GO:0000460 // GO:0000470 // GO:0000027 // GO:0000460 // GO:0000470 // GO:0006364 // GO:0042254	ribosomal large subunit assembly // maturation of 5.8S rRNA // maturation of LSU-rRNA // ribosomal large subunit assembly // maturation of 5.8S rRNA // maturation of LSU-rRNA // rRNA processing // ribosome biogenesis	GO:0005730 // GO:0030687 // GO:0005634 // GO:0005730 // GO:0030687	nucleolus // preribosome, large subunit precursor // nucleus // nucleolus // preribosome, large subunit precursor	GO:0003723 // GO:0005515 // GO:0042134 // GO:0044822 // GO:0003723 // GO:0019843 // GO:0042134	RNA binding // protein binding // rRNA primary transcript binding // poly(A) RNA binding // RNA binding // rRNA binding // rRNA primary transcript binding	---	---
TC0100008885.hg.1	28.6339	36.9176	SPATA1	1p22.3	NM_001310156	RefSeq	Homo sapiens spermatogenesis associated 1 (SPATA1), mRNA.	FALSE	Hs.584956	chr1	+	84506291	84567106	Q5VX52	---	---	---	---	---	---	---	---
TC0100008897.hg.1	28.0485	35.3612	WDR63	1p22.3	NM_001288563	RefSeq	Homo sapiens WD repeat domain 63 (WDR63), transcript variant 2, mRNA.	FALSE	Hs.97933	chr1	+	84999147	85133138	Q8IWG1	---	---	---	---	---	---	---	---
TC0100008912.hg.1	26.9249	25.8772	CYR61	1p22.3	NM_001554	RefSeq	Homo sapiens cysteine-rich, angiogenic inducer, 61 (CYR61), mRNA.	FALSE	Hs.8867	chr1	+	85580761	85583965	O00622	GO:0001558 // GO:0001649 // GO:0001934 // GO:0002041 // GO:0003181 // GO:0003278 // GO:0003281 // GO:0006935 // GO:0007155 // GO:0007165 // GO:0007267 // GO:0008283 // GO:0009653 // GO:0010518 // GO:0010811 // GO:0030198 // GO:0030335 // GO:0030513 // GO:0033690 // GO:0043066 // GO:0043280 // GO:0044319 // GO:0045669 // GO:0045860 // GO:0045944 // GO:0060413 // GO:0060548 // GO:0060591 // GO:0060…	regulation of cell growth // osteoblast differentiation // positive regulation of protein phosphorylation // intussusceptive angiogenesis // atrioventricular valve morphogenesis // apoptotic process involved in heart morphogenesis // ventricular septum development // chemotaxis // cell adhesion // signal transduction // cell-cell signaling // cell proliferation // anatomical structure morphogenes…	GO:0005578 // GO:0031012 // GO:0005576 // GO:0005578	proteinaceous extracellular matrix // extracellular matrix // extracellular region // proteinaceous extracellular matrix	GO:0005178 // GO:0005520 // GO:0008201 // GO:0050840 // GO:0005178 // GO:0005178 // GO:0008201 // GO:0008201 // GO:0019838 // GO:0000166	integrin binding // insulin-like growth factor binding // heparin binding // extracellular matrix binding // integrin binding // integrin binding // heparin binding // heparin binding // growth factor binding // nucleotide binding	GenMAPP	Hypertrophy_model
TC0100008921.hg.1	7.38006	8.40127	CLCA2	1p22.3	NM_006536	RefSeq	Homo sapiens chloride channel accessory 2 (CLCA2), mRNA.	FALSE	Hs.241551	chr1	+	86424086	86456558	Q9UQC9	GO:0006508 // GO:0006810 // GO:0007155 // GO:0034220 // GO:0055085 // GO:1902476 // GO:0006810 // GO:0006811 // GO:0006821 // GO:0034220 // GO:1902476	proteolysis // transport // cell adhesion // ion transmembrane transport // transmembrane transport // chloride transmembrane transport // transport // ion transport // chloride transport // ion transmembrane transport // chloride transmembrane transport	GO:0005576 // GO:0005634 // GO:0005886 // GO:0005887 // GO:0009925 // GO:0030054 // GO:0005886 // GO:0016020 // GO:0016021 // GO:0030054	extracellular region // nucleus // plasma membrane // integral component of plasma membrane // basal plasma membrane // cell junction // plasma membrane // membrane // integral component of membrane // cell junction	GO:0005229 // GO:0005254 // GO:0008237 // GO:0015276 // GO:0046872 // GO:0005229 // GO:0005254 // GO:0008233 // GO:0016787	intracellular calcium activated chloride channel activity // chloride channel activity // metallopeptidase activity // ligand-gated ion channel activity // metal ion binding // intracellular calcium activated chloride channel activity // chloride channel activity // peptidase activity // hydrolase activity	---	---
TC0100008922.hg.1	18.8062	33.2569	CLCA1	1p22.3	NM_001285	RefSeq	Homo sapiens chloride channel accessory 1 (CLCA1), mRNA.	FALSE	Hs.194659	chr1	+	86468368	86500291	A8K7I4	GO:0006508 // GO:0006810 // GO:0006816 // GO:0006821 // GO:0006821 // GO:0034220 // GO:0055085 // GO:1902476 // GO:1902476 // GO:0006810 // GO:0006811 // GO:0006821 // GO:1902476	proteolysis // transport // calcium ion transport // chloride transport // chloride transport // ion transmembrane transport // transmembrane transport // chloride transmembrane transport // chloride transmembrane transport // transport // ion transport // chloride transport // chloride transmembrane transport	GO:0005615 // GO:0005886 // GO:0005887 // GO:0005902 // GO:0030141 // GO:0005576 // GO:0005886 // GO:0016020 // GO:0016021	extracellular space // plasma membrane // integral component of plasma membrane // microvillus // secretory granule // extracellular region // plasma membrane // membrane // integral component of membrane	GO:0005229 // GO:0005254 // GO:0008237 // GO:0046872 // GO:0005229 // GO:0008233 // GO:0016787	intracellular calcium activated chloride channel activity // chloride channel activity // metallopeptidase activity // metal ion binding // intracellular calcium activated chloride channel activity // peptidase activity // hydrolase activity	---	---
TC0100008924.hg.1	16.2882	19.2312	CLCA4	1p22.3	NM_012128	RefSeq	Homo sapiens chloride channel accessory 4 (CLCA4), transcript variant 1, mRNA.	FALSE	Hs.567422	chr1	+	86547076	86580754	Q14CN2	GO:0006508 // GO:0006810 // GO:0006821 // GO:0006821 // GO:0034220 // GO:0055085 // GO:1902476 // GO:1902476 // GO:0006810 // GO:0006821 // GO:1902476	proteolysis // transport // chloride transport // chloride transport // ion transmembrane transport // transmembrane transport // chloride transmembrane transport // chloride transmembrane transport // transport // chloride transport // chloride transmembrane transport	GO:0005886 // GO:0005887 // GO:0016324 // GO:0070062 // GO:0005576 // GO:0005886 // GO:0016020 // GO:0016021	plasma membrane // integral component of plasma membrane // apical plasma membrane // extracellular exosome // extracellular region // plasma membrane // membrane // integral component of membrane	GO:0005229 // GO:0005254 // GO:0008237 // GO:0046872 // GO:0005229 // GO:0008233 // GO:0016787	intracellular calcium activated chloride channel activity // chloride channel activity // metallopeptidase activity // metal ion binding // intracellular calcium activated chloride channel activity // peptidase activity // hydrolase activity	---	---
TC0100008927.hg.1	2272.31	2957.12	SH3GLB1	1p22	NM_001206651	RefSeq	Homo sapiens SH3-domain GRB2-like endophilin B1 (SH3GLB1), transcript variant 2, mRNA.	FALSE	Hs.136309	chr1	+	86704570	86748184	Q9Y371	GO:0006914 // GO:0006915 // GO:0010508 // GO:0031647 // GO:0032461 // GO:0032465 // GO:0032801 // GO:0034198 // GO:0042149 // GO:0048102 // GO:0051259 // GO:0090148 // GO:1903527 // GO:1903778 // GO:1903955 // GO:2000786 // GO:0006654 // GO:0007005 // GO:0008654 // GO:0043552 // GO:0051084 // GO:1900740 // GO:1902254 // GO:1902255	autophagy // apoptotic process // positive regulation of autophagy // regulation of protein stability // positive regulation of protein oligomerization // regulation of cytokinesis // receptor catabolic process // cellular response to amino acid starvation // cellular response to glucose starvation // autophagic cell death // protein oligomerization // membrane fission // positive regulation of m…	GO:0000139 // GO:0000421 // GO:0005737 // GO:0005741 // GO:0030496 // GO:0031410 // GO:0070062 // GO:0000421 // GO:0005737 // GO:0005739 // GO:0005794 // GO:0016020 // GO:0030496 // GO:0043234	Golgi membrane // autophagosome membrane // cytoplasm // mitochondrial outer membrane // midbody // cytoplasmic vesicle // extracellular exosome // autophagosome membrane // cytoplasm // mitochondrion // Golgi apparatus // membrane // midbody // protein complex	GO:0005515 // GO:0008289 // GO:0042802 // GO:0042803 // GO:0005504 // GO:0042171	protein binding // lipid binding // identical protein binding // protein homodimerization activity // fatty acid binding // lysophosphatidic acid acyltransferase activity	---	---
TC0100008937.hg.1	29.0231	28.7018	LOC101927844	---	NM_001290053	RefSeq	Homo sapiens uncharacterized LOC101927844 (LOC101927844), mRNA.	FALSE	---	chr1	+	87212669	87251331	---	---	---	---	---	---	---	---	---
TC0100008938.hg.1	3448.17	3379.09	LMO4	1p22.3	NM_006769	RefSeq	Homo sapiens LIM domain only 4 (LMO4), mRNA.	FALSE	Hs.436792	chr1	+	87328468	87348923	P61968	GO:0001843 // GO:0003281 // GO:0006366 // GO:0021514 // GO:0021522 // GO:0021527 // GO:0031333 // GO:0042659 // GO:0045944 // GO:0048538 // GO:0050865 // GO:0001843 // GO:0006351 // GO:0006355 // GO:0006366	neural tube closure // ventricular septum development // transcription from RNA polymerase II promoter // ventral spinal cord interneuron differentiation // spinal cord motor neuron differentiation // spinal cord association neuron differentiation // negative regulation of protein complex assembly // regulation of cell fate specification // positive regulation of transcription from RNA polymerase…	GO:0005667 // GO:0005667	transcription factor complex // transcription factor complex	GO:0001158 // GO:0003700 // GO:0005515 // GO:0008134 // GO:0008270 // GO:0008134 // GO:0046872	enhancer sequence-specific DNA binding // transcription factor activity, sequence-specific DNA binding // protein binding // transcription factor binding // zinc ion binding // transcription factor binding // metal ion binding	---	---
TC0100008955.hg.1	1811.81	1805.66	PKN2	1p22.2	NM_006256	RefSeq	Homo sapiens protein kinase N2 (PKN2), mRNA.	FALSE	Hs.440833	chr1	+	88684222	88836255	Q16513	GO:0006351 // GO:0006355 // GO:0006468 // GO:0006915 // GO:0007049 // GO:0007155 // GO:0007165 // GO:0007264 // GO:0010631 // GO:0032467 // GO:0043297 // GO:0045070 // GO:0045931 // GO:0051301 // GO:2000145 // GO:0006468 // GO:0006468 // GO:0007165 // GO:0016310	transcription, DNA-templated // regulation of transcription, DNA-templated // protein phosphorylation // apoptotic process // cell cycle // cell adhesion // signal transduction // small GTPase mediated signal transduction // epithelial cell migration // positive regulation of cytokinesis // apical junction assembly // positive regulation of viral genome replication // positive regulation of mitot…	GO:0005634 // GO:0005654 // GO:0005737 // GO:0005813 // GO:0005829 // GO:0005886 // GO:0030027 // GO:0030054 // GO:0030496 // GO:0032154 // GO:0043234 // GO:0043296 // GO:0045111 // GO:0048471 // GO:0005634 // GO:0005737 // GO:0005856 // GO:0016020 // GO:0030027 // GO:0030054 // GO:0030496 // GO:0032154 // GO:0042995	nucleus // nucleoplasm // cytoplasm // centrosome // cytosol // plasma membrane // lamellipodium // cell junction // midbody // cleavage furrow // protein complex // apical junction complex // intermediate filament cytoskeleton // perinuclear region of cytoplasm // nucleus // cytoplasm // cytoskeleton // membrane // lamellipodium // cell junction // midbody // cleavage furrow // cell projection	GO:0004672 // GO:0004674 // GO:0004697 // GO:0005515 // GO:0005524 // GO:0016301 // GO:0042826 // GO:0044822 // GO:0070063 // GO:0000166 // GO:0004672 // GO:0004674 // GO:0016301 // GO:0016740	protein kinase activity // protein serine/threonine kinase activity // protein kinase C activity // protein binding // ATP binding // kinase activity // histone deacetylase binding // poly(A) RNA binding // RNA polymerase binding // nucleotide binding // protein kinase activity // protein serine/threonine kinase activity // kinase activity // transferase activity	---	---
TC0100008965.hg.1	39.2593	51.2001	flawmawbo	---	flawmawbo.aAug10	Ace View	Transcript Identified by AceView	FALSE	---	chr1	+	89012127	89050043	---	---	---	---	---	---	---	---	---
TC0100008975.hg.1	62.8133	68.4055	GBP6	1p22.2	NM_198460	RefSeq	Homo sapiens guanylate binding protein family, member 6 (GBP6), mRNA.	FALSE	Hs.254338	chr1	+	89363877	89388160	Q6ZN66	GO:0006955 // GO:0008152 // GO:0042742 // GO:0071346	immune response // metabolic process // defense response to bacterium // cellular response to interferon-gamma	GO:0070062	extracellular exosome	GO:0003924 // GO:0005525 // GO:0000166	GTPase activity // GTP binding // nucleotide binding	---	---
TC0100008978.hg.1	180.283	139.578	LRRC8B	1p22.2	NM_001134476	RefSeq	Homo sapiens leucine rich repeat containing 8 family, member B (LRRC8B), transcript variant 2, mRNA.	FALSE	Hs.482017 // Hs.741594	chr1	+	89524836	89597864	Q6P9F7	GO:0006811 // GO:0006810	ion transport // transport	GO:0005886 // GO:0016021 // GO:0016020	plasma membrane // integral component of membrane // membrane	GO:0005515	protein binding	---	---
TC0100008996.hg.1	1999.41	1621.63	ZNF326	1p22.2	NM_182975	RefSeq	Homo sapiens zinc finger protein 326 (ZNF326), transcript variant 3, mRNA.	FALSE	Hs.306221	chr1	+	89995112	90035531	Q5BKZ1	GO:0006351 // GO:0006397 // GO:0008380 // GO:0032784 // GO:0006355 // GO:0008380	transcription, DNA-templated // mRNA processing // RNA splicing // regulation of DNA-templated transcription, elongation // regulation of transcription, DNA-templated // RNA splicing	GO:0005654 // GO:0005681 // GO:0016363 // GO:0043231 // GO:0044609 // GO:0005634	nucleoplasm // spliceosomal complex // nuclear matrix // intracellular membrane-bounded organelle // DBIRD complex // nucleus	GO:0000993 // GO:0003677 // GO:0005515 // GO:0044822 // GO:0046872	RNA polymerase II core binding // DNA binding // protein binding // poly(A) RNA binding // metal ion binding	---	---
TC0100009020.hg.1	1562.87	1279.68	CDC7	1p22	NM_001134419	RefSeq	Homo sapiens cell division cycle 7 (CDC7), transcript variant 2, mRNA.	FALSE	Hs.533573	chr1	+	91500847	91525764	O00311	GO:0000082 // GO:0000278 // GO:0000727 // GO:0006260 // GO:0006270 // GO:0006909 // GO:0008284 // GO:0008360 // GO:0010571 // GO:0010971 // GO:0018105 // GO:0044770 // GO:0051301 // GO:0000727 // GO:0006270 // GO:0006468 // GO:0006909 // GO:0007049 // GO:0008360 // GO:0016310 // GO:0018105	G1/S transition of mitotic cell cycle // mitotic cell cycle // double-strand break repair via break-induced replication // DNA replication // DNA replication initiation // phagocytosis // positive regulation of cell proliferation // regulation of cell shape // positive regulation of nuclear cell cycle DNA replication // positive regulation of G2/M transition of mitotic cell cycle // peptidyl-seri…	GO:0005634 // GO:0005654 // GO:0005654 // GO:0005737 // GO:0015630 // GO:0045171 // GO:0005634	nucleus // nucleoplasm // nucleoplasm // cytoplasm // microtubule cytoskeleton // intercellular bridge // nucleus	GO:0004672 // GO:0004674 // GO:0005515 // GO:0005524 // GO:0016301 // GO:0046872 // GO:0000166 // GO:0004672 // GO:0004674 // GO:0004674 // GO:0016301 // GO:0016740	protein kinase activity // protein serine/threonine kinase activity // protein binding // ATP binding // kinase activity // metal ion binding // nucleotide binding // protein kinase activity // protein serine/threonine kinase activity // protein serine/threonine kinase activity // kinase activity // transferase activity	GenMAPP // GenMAPP	Cell_cycle_KEGG // DNA_replication_Reactome
TC0100009029.hg.1	955.377	977.887	BRDT	1p22.1	NM_001242805	RefSeq	Homo sapiens bromodomain, testis-specific (BRDT), transcript variant 3, mRNA.	FALSE	Hs.482520	chr1	+	91949371	92014428	Q58F21	GO:0001207 // GO:0006338 // GO:0006351 // GO:0006397 // GO:0007140 // GO:0007141 // GO:0007283 // GO:0008380 // GO:0030154 // GO:0043484 // GO:0051039 // GO:0001207 // GO:0006338 // GO:0006355 // GO:0007140 // GO:0007141 // GO:0007283 // GO:0016568 // GO:0043484 // GO:0051039 // GO:0051321	histone displacement // chromatin remodeling // transcription, DNA-templated // mRNA processing // male meiosis // male meiosis I // spermatogenesis // RNA splicing // cell differentiation // regulation of RNA splicing // positive regulation of transcription during meiosis // histone displacement // chromatin remodeling // regulation of transcription, DNA-templated // male meiosis // male meiosis…	GO:0005634 // GO:0005634	nucleus // nucleus	GO:0003713 // GO:0042393 // GO:0070577 // GO:0070577	transcription coactivator activity // histone binding // lysine-acetylated histone binding // lysine-acetylated histone binding	---	---
TC0100009030.hg.1	57.3049	69.049	EPHX4	1p22.1	NM_173567	RefSeq	Homo sapiens epoxide hydrolase 4 (EPHX4), mRNA.	FALSE	Hs.201555	chr1	+	92029976	92063536	Q8IUS5	GO:0044255 // GO:0044255	cellular lipid metabolic process // cellular lipid metabolic process	GO:0016021 // GO:0016020	integral component of membrane // membrane	GO:0004301 // GO:0003824 // GO:0004301 // GO:0016787	epoxide hydrolase activity // catalytic activity // epoxide hydrolase activity // hydrolase activity	---	---
TC0100009032.hg.1	77.2471	70.0954	BTBD8	1p22.1	NM_183242	RefSeq	Homo sapiens BTB (POZ) domain containing 8 (BTBD8), mRNA.	FALSE	Hs.676102	chr1	+	92080305	92147841	Q5XKL5	GO:0006357 // GO:0045893 // GO:0006357 // GO:0045893	regulation of transcription from RNA polymerase II promoter // positive regulation of transcription, DNA-templated // regulation of transcription from RNA polymerase II promoter // positive regulation of transcription, DNA-templated	GO:0005654 // GO:0005737 // GO:0005634 // GO:0005737	nucleoplasm // cytoplasm // nucleus // cytoplasm	GO:0000976 // GO:0003700 // GO:0000976 // GO:0003700	transcription regulatory region sequence-specific DNA binding // transcription factor activity, sequence-specific DNA binding // transcription regulatory region sequence-specific DNA binding // transcription factor activity, sequence-specific DNA binding	---	---
TC0100009035.hg.1	20.9413	25.0915	KIAA1107	1p22.1	NM_015237	RefSeq	Homo sapiens KIAA1107 (KIAA1107), mRNA.	FALSE	Hs.21554	chr1	+	92167052	92184723	Q9UPP5	---	---	---	---	---	---	---	---
TC0100009038.hg.1	12.5305	10.5718	C1orf146	1p22.1	NM_001012425	RefSeq	Homo sapiens chromosome 1 open reading frame 146 (C1orf146), mRNA.	FALSE	Hs.558823	chr1	+	92217940	92245813	Q5VVC0	---	---	---	---	---	---	---	---
TC0100009040.hg.1	649.989	710.966	RPAP2	1p22.1	NM_024813	RefSeq	Homo sapiens RNA polymerase II associated protein 2 (RPAP2), mRNA.	FALSE	Hs.444421	chr1	+	92298965	92402057	Q8IXW5	GO:0009301 // GO:0070940 // GO:0006351 // GO:0006355	snRNA transcription // dephosphorylation of RNA polymerase II C-terminal domain // transcription, DNA-templated // regulation of transcription, DNA-templated	GO:0005634 // GO:0005730 // GO:0005737 // GO:0016591 // GO:0005634 // GO:0005737	nucleus // nucleolus // cytoplasm // DNA-directed RNA polymerase II, holoenzyme // nucleus // cytoplasm	GO:0008420 // GO:0046872 // GO:0004721 // GO:0016787	CTD phosphatase activity // metal ion binding // phosphoprotein phosphatase activity // hydrolase activity	---	---
TC0100009046.hg.1	59207.1	64782.9	RPL5	1p22.1	NM_000969	RefSeq	Homo sapiens ribosomal protein L5 (RPL5), mRNA.	FALSE	Hs.532359	chr1	+	92832025	92841924	P46777	GO:0000027 // GO:0000184 // GO:0006364 // GO:0006412 // GO:0006412 // GO:0006413 // GO:0006414 // GO:0006415 // GO:0006614 // GO:0010467 // GO:0016032 // GO:0019058 // GO:0019083 // GO:0042273 // GO:0044267 // GO:0000027 // GO:0006412	ribosomal large subunit assembly // nuclear-transcribed mRNA catabolic process, nonsense-mediated decay // rRNA processing // translation // translation // translational initiation // translational elongation // translational termination // SRP-dependent cotranslational protein targeting to membrane // gene expression // viral process // viral life cycle // viral transcription // ribosomal large …	GO:0005634 // GO:0005730 // GO:0005737 // GO:0005829 // GO:0005925 // GO:0016020 // GO:0022625 // GO:0030529 // GO:0070062 // GO:0005622 // GO:0005634 // GO:0005730 // GO:0005737 // GO:0005840 // GO:0022625 // GO:0030529	nucleus // nucleolus // cytoplasm // cytosol // focal adhesion // membrane // cytosolic large ribosomal subunit // ribonucleoprotein complex // extracellular exosome // intracellular // nucleus // nucleolus // cytoplasm // ribosome // cytosolic large ribosomal subunit // ribonucleoprotein complex	GO:0003723 // GO:0003735 // GO:0005515 // GO:0008097 // GO:0044822 // GO:0003723 // GO:0003735 // GO:0003735 // GO:0008097 // GO:0008097 // GO:0019843	RNA binding // structural constituent of ribosome // protein binding // 5S rRNA binding // poly(A) RNA binding // RNA binding // structural constituent of ribosome // structural constituent of ribosome // 5S rRNA binding // 5S rRNA binding // rRNA binding	GenMAPP	Ribosomal_Proteins
TC0100009048.hg.1	320.933	254.377	RPL5	---	hsa_circ_0000092	circbase	Memczak2013 ALT_ACCEPTOR, ALT_DONOR, coding, INTERNAL, intronic best transcript NM_000969	FALSE	---	chr1	+	92839497	92839610	---	---	---	---	---	---	---	---	---
TC0100009054.hg.1	2296.01	2176.14	MTF2	1p22.1	NM_001164391	RefSeq	Homo sapiens metal response element binding transcription factor 2 (MTF2), transcript variant 3, mRNA.	FALSE	Hs.31016	chr1	+	93079235	93139081	Q9Y483	GO:0000122 // GO:0007379 // GO:0010467 // GO:0016568 // GO:0019827 // GO:0040029 // GO:0045814 // GO:0045944 // GO:0048863 // GO:0061086 // GO:0061087 // GO:0000122 // GO:0007379 // GO:0019827 // GO:0045944 // GO:0048863 // GO:0061086 // GO:0061087	negative regulation of transcription from RNA polymerase II promoter // segment specification // gene expression // chromatin modification // stem cell population maintenance // regulation of gene expression, epigenetic // negative regulation of gene expression, epigenetic // positive regulation of transcription from RNA polymerase II promoter // stem cell differentiation // negative regulation o…	GO:0005634 // GO:0005654 // GO:0005737 // GO:0035098 // GO:0005634 // GO:0035098	nucleus // nucleoplasm // cytoplasm // ESC/E(Z) complex // nucleus // ESC/E(Z) complex	GO:0003677 // GO:0008270 // GO:0035064 // GO:0046872	DNA binding // zinc ion binding // methylated histone binding // metal ion binding	---	---
TC0100009056.hg.1	455.981	342.163	CCDC18	1p22.1	NM_001306076	RefSeq	Homo sapiens coiled-coil domain containing 18 (CCDC18), transcript variant 1, mRNA.	FALSE	Hs.745125	chr1	+	93179919	93278730	Q5T9S5	GO:0007099 // GO:0098535 // GO:0007099 // GO:0098535	centriole replication // de novo centriole assembly // centriole replication // de novo centriole assembly	GO:0005814 // GO:0005814	centriole // centriole	---	---	---	---
TC0100009061.hg.1	9240.88	9718.67	DR1	1p22.1	NM_001938	RefSeq	Homo sapiens down-regulator of transcription 1 (DR1), mRNA.	FALSE	Hs.348418	chr1	+	93345888	93369498	Q01658	GO:0000122 // GO:0006325 // GO:0006351 // GO:0043966 // GO:0006355	negative regulation of transcription from RNA polymerase II promoter // chromatin organization // transcription, DNA-templated // histone H3 acetylation // regulation of transcription, DNA-templated	GO:0005634 // GO:0005671 // GO:0005634	nucleus // Ada2/Gcn5/Ada3 transcription activator complex // nucleus	GO:0003677 // GO:0003714 // GO:0005515 // GO:0008134 // GO:0017025 // GO:0046982 // GO:0003677	DNA binding // transcription corepressor activity // protein binding // transcription factor binding // TBP-class protein binding // protein heterodimerization activity // DNA binding	---	---
TC0100009064.hg.1	10.2202	9.84223	FNBP1L	1p22.1	NM_001024948	RefSeq	Homo sapiens formin binding protein 1-like (FNBP1L), transcript variant 1, mRNA.	FALSE	Hs.134060	chr1	+	93448131	93554661	Q5T0N5	GO:0006900 // GO:0006914 // GO:0010324 // GO:0016050 // GO:0030050 // GO:0042384 // GO:0051491 // GO:0072583 // GO:0097320 // GO:0006897	membrane budding // autophagy // membrane invagination // vesicle organization // vesicle transport along actin filament // cilium assembly // positive regulation of filopodium assembly // clathrin-mediated endocytosis // membrane tubulation // endocytosis	GO:0005737 // GO:0005856 // GO:0005886 // GO:0005938 // GO:0016023 // GO:0070062 // GO:0005737 // GO:0016020 // GO:0016023 // GO:0031410	cytoplasm // cytoskeleton // plasma membrane // cell cortex // cytoplasmic membrane-bounded vesicle // extracellular exosome // cytoplasm // membrane // cytoplasmic membrane-bounded vesicle // cytoplasmic vesicle	GO:0005515 // GO:0008289	protein binding // lipid binding	---	---
TC0100009067.hg.1	961.65	993.388	FNBP1L	---	FNBP1L.gAug10-unspliced	Ace View	Transcript Identified by AceView, Entrez Gene ID(s) 54874	FALSE	---	chr1	+	93541765	93568183	---	---	---	---	---	---	---	---	---
TC0100009097.hg.1	2311.19	2197.21	ABCD3	1p21.3	NM_001122674	RefSeq	Homo sapiens ATP-binding cassette, sub-family D (ALD), member 3 (ABCD3), transcript variant 2, mRNA.	FALSE	Hs.700576	chr1	+	94418377	94518666	P28288	GO:0006633 // GO:0006635 // GO:0007031 // GO:0007031 // GO:0014070 // GO:0015910 // GO:0042493 // GO:0042760 // GO:0055085 // GO:0006810 // GO:0055085 // GO:0008152	fatty acid biosynthetic process // fatty acid beta-oxidation // peroxisome organization // peroxisome organization // response to organic cyclic compound // peroxisomal long-chain fatty acid import // response to drug // very long-chain fatty acid catabolic process // transmembrane transport // transport // transmembrane transport // metabolic process	GO:0005743 // GO:0005777 // GO:0005778 // GO:0005778 // GO:0005782 // GO:0005829 // GO:0016020 // GO:0016021 // GO:0043231 // GO:0005739 // GO:0005777 // GO:0005778 // GO:0016020	mitochondrial inner membrane // peroxisome // peroxisomal membrane // peroxisomal membrane // peroxisomal matrix // cytosol // membrane // integral component of membrane // intracellular membrane-bounded organelle // mitochondrion // peroxisome // peroxisomal membrane // membrane	GO:0005324 // GO:0005515 // GO:0005524 // GO:0016887 // GO:0042626 // GO:0042803 // GO:0043621 // GO:0000166 // GO:0005524 // GO:0016887 // GO:0042803	long-chain fatty acid transporter activity // protein binding // ATP binding // ATPase activity // ATPase activity, coupled to transmembrane movement of substances // protein homodimerization activity // protein self-association // nucleotide binding // ATP binding // ATPase activity // protein homodimerization activity	---	---
TC0100009101.hg.1	22.4377	34.7537	ABCD3	---	ABCD3.rAug10-unspliced	Ace View	Transcript Identified by AceView, Entrez Gene ID(s) 5825	FALSE	---	chr1	+	94500423	94501322	---	---	---	---	---	---	---	---	---
TC0100009102.hg.1	7.35156	9.6865	ABCD3	---	ABCD3.vaAug10-unspliced	Ace View	Transcript Identified by AceView, Entrez Gene ID(s) 5825	FALSE	---	chr1	+	94521491	94522026	---	---	---	---	---	---	---	---	---
TC0100009109.hg.1	16.7612	17.8168	SLC44A3	1p21.3	NM_001114106	RefSeq	Homo sapiens solute carrier family 44, member 3 (SLC44A3), transcript variant 1, mRNA.	FALSE	Hs.483423	chr1	+	94820342	94895247	Q8N4M1	GO:0006644 // GO:0006656 // GO:0044281 // GO:0046474 // GO:0055085	phospholipid metabolic process // phosphatidylcholine biosynthetic process // small molecule metabolic process // glycerophospholipid biosynthetic process // transmembrane transport	GO:0005886 // GO:0016021 // GO:0016020	plasma membrane // integral component of membrane // membrane	GO:0005515	protein binding	---	---
TC0100009112.hg.1	52.857	38.9453	LOC729970	1p21.3	NR_033998	RefSeq	Homo sapiens hCG2028352-like (LOC729970), long non-coding RNA.	FALSE	Hs.297988	chr1	+	94927298	94967461	---	---	---	---	---	---	---	---	---
TC0100009116.hg.1	74.8023	80.8389	RWDD3	1p21.3	NM_001128142	RefSeq	Homo sapiens RWD domain containing 3 (RWDD3), transcript variant 2, mRNA.	FALSE	Hs.709591	chr1	+	95092517	95247225	Q9Y3V2	GO:0032088 // GO:0033235 // GO:1902073	negative regulation of NF-kappaB transcription factor activity // positive regulation of protein sumoylation // positive regulation of hypoxia-inducible factor-1alpha signaling pathway	GO:0005634 // GO:0005737	nucleus // cytoplasm	GO:0005515	protein binding	---	---
TC0100009142.hg.1	548.179	448.126	PTBP2	1p21.3	NM_001300985	RefSeq	Homo sapiens polypyrimidine tract binding protein 2 (PTBP2), transcript variant 1, mRNA.	FALSE	Hs.743449	chr1	+	96721605	96823738	Q9UKA9	GO:0006376 // GO:0033119 // GO:2000177 // GO:0006397 // GO:0008380	mRNA splice site selection // negative regulation of RNA splicing // regulation of neural precursor cell proliferation // mRNA processing // RNA splicing	GO:0005681 // GO:0005634	spliceosomal complex // nucleus	GO:0000166 // GO:0003729 // GO:0044822 // GO:0003676 // GO:0003723	nucleotide binding // mRNA binding // poly(A) RNA binding // nucleic acid binding // RNA binding	GenMAPP	mRNA_processing_Reactome
TC0100009149.hg.1	511.899	310.376	PTBP2	---	PTBP2.oAug10-unspliced	Ace View	Transcript Identified by AceView, Entrez Gene ID(s) 58155	FALSE	---	chr1	+	96801934	96804763	---	---	---	---	---	---	---	---	---
TC0100009176.hg.1	24.7412	25.8054	SNX7	1p21.3	NM_015976	RefSeq	Homo sapiens sorting nexin 7 (SNX7), transcript variant 1, mRNA.	FALSE	Hs.197015	chr1	+	98661680	98760500	Q9UNH6	GO:0006897 // GO:0015031 // GO:0016050 // GO:0006810 // GO:0006897 // GO:0016050	endocytosis // protein transport // vesicle organization // transport // endocytosis // vesicle organization	GO:0005768 // GO:0019898 // GO:0030659 // GO:0005768 // GO:0016020 // GO:0019898 // GO:0031410	endosome // extrinsic component of membrane // cytoplasmic vesicle membrane // endosome // membrane // extrinsic component of membrane // cytoplasmic vesicle	GO:0005515 // GO:0035091 // GO:0008289 // GO:0035091 // GO:0035091	protein binding // phosphatidylinositol binding // lipid binding // phosphatidylinositol binding // phosphatidylinositol binding	---	---
TC0100009181.hg.1	21.0081	13.8396	PLPPR4	1p21.2	NM_001166252	RefSeq	Homo sapiens phospholipid phosphatase related 4 (PLPPR4), transcript variant 2, mRNA.	FALSE	Hs.13245	chr1	+	99263953	99309590	Q7Z2D5	GO:0006644 // GO:0007165 // GO:0007409 // GO:0046839 // GO:0048839 // GO:0006644 // GO:0007165 // GO:0007409 // GO:0007409 // GO:0046839 // GO:0046839	phospholipid metabolic process // signal transduction // axonogenesis // phospholipid dephosphorylation // inner ear development // phospholipid metabolic process // signal transduction // axonogenesis // axonogenesis // phospholipid dephosphorylation // phospholipid dephosphorylation	GO:0005887 // GO:0009897 // GO:0005887 // GO:0005887 // GO:0016020 // GO:0016021	integral component of plasma membrane // external side of plasma membrane // integral component of plasma membrane // integral component of plasma membrane // membrane // integral component of membrane	GO:0008195 // GO:0042577 // GO:0016787 // GO:0042577 // GO:0042577	phosphatidate phosphatase activity // lipid phosphatase activity // hydrolase activity // lipid phosphatase activity // lipid phosphatase activity	---	---
TC0100009183.hg.1	75.9813	52.5185	PALMD	1p21.2	NM_017734	RefSeq	Homo sapiens palmdelphin (PALMD), mRNA.	FALSE	Hs.483993	chr1	+	99645875	99694541	Q9NP74	GO:0008360	regulation of cell shape	GO:0005737 // GO:0016020 // GO:0043197 // GO:0030425 // GO:0042995	cytoplasm // membrane // dendritic spine // dendrite // cell projection	---	---	---	---
TC0100009191.hg.1	422.439	456.278	AGL	1p21	NM_000028	RefSeq	Homo sapiens amylo-alpha-1, 6-glucosidase, 4-alpha-glucanotransferase (AGL), transcript variant 4, mRNA.	FALSE	Hs.904	chr1	+	99850084	99924023	P35573	GO:0005975 // GO:0005978 // GO:0005980 // GO:0005980 // GO:0006006 // GO:0007584 // GO:0044281 // GO:0051384 // GO:0005975 // GO:0005977 // GO:0005980 // GO:0005980 // GO:0008152 // GO:0009725	carbohydrate metabolic process // glycogen biosynthetic process // glycogen catabolic process // glycogen catabolic process // glucose metabolic process // response to nutrient // small molecule metabolic process // response to glucocorticoid // carbohydrate metabolic process // glycogen metabolic process // glycogen catabolic process // glycogen catabolic process // metabolic process // response…	GO:0005634 // GO:0005737 // GO:0005829 // GO:0016234 // GO:0016529 // GO:0043033 // GO:0005737	nucleus // cytoplasm // cytosol // inclusion body // sarcoplasmic reticulum // isoamylase complex // cytoplasm	GO:0004133 // GO:0004134 // GO:0004135 // GO:0005515 // GO:0030247 // GO:0031593 // GO:0003824 // GO:0004133 // GO:0004134 // GO:0004134 // GO:0004135 // GO:0004135 // GO:0016740 // GO:0016757 // GO:0016787 // GO:0016798 // GO:0030246	glycogen debranching enzyme activity // 4-alpha-glucanotransferase activity // amylo-alpha-1,6-glucosidase activity // protein binding // polysaccharide binding // polyubiquitin binding // catalytic activity // glycogen debranching enzyme activity // 4-alpha-glucanotransferase activity // 4-alpha-glucanotransferase activity // amylo-alpha-1,6-glucosidase activity // amylo-alpha-1,6-glucosidase ac…	GenMAPP // HumanCyc // HumanCyc // MetaCyc // MetaCyc	Glycogen_Metabolism // PWY-5941 // GLYCOCAT-PWY // PWY-5941 // GLYCOCAT-PWY
[truncated: 23,901 more rows]

## Sheet: Fig. S2
NAME	GS<br> follow link to MSigDB	GS DETAILS	SIZE	ES	NES	NOM p-val	FDR q-val	FWER p-val	RANK AT MAX	LEADING EDGE
[truncated: 3,806 more rows]

[truncated: 1 more sheets: Fig. S3]
